# Supplementary material for: Fluid, pH and electrolyte imbalance associated with COVID-19 mortality
Source: Research Square preprint supplement (doi:10.21203/rs.3.rs-145823/v1), 2021-03-08
Supplement: Supplementary file 1 [file 25e0d45286e07652afadc30b.xlsx]

## Sheet: FPEI ICD codes
	Univariate analysis of individual ICD codes in the Fluid, pH and Electrolyte Imbalance (FPEI) comorbidity group
Variable	P	HR_2SD	LCL_2SD	UCL_2SD	Transformation	N	mean	sd	HR	LCL	UCL
Acidosis E87.2	2.56e-81	1.34	1.3	1.39	0	122250	0.0479	0.214	2	1.86	2.15
Hyperkalemia E87.5	2.29e-43	1.24	1.21	1.28	0	122250	0.046	0.209	1.68	1.56	1.81
Hypo-osmolality and hyponatremia E87.1	5.65e-43	1.26	1.22	1.3	0	122250	0.058	0.234	1.63	1.52	1.75
Fluid overload E87.7	3.33e-35	1.19	1.16	1.22	0	122250	0.0168	0.128	1.97	1.77	2.2
Hypokalemia E87.6	5.83e-34	1.26	1.22	1.31	0	122250	0.0965	0.295	1.48	1.39	1.58
Hyperosmolality and hypernatremia E87.0	1.04e-33	1.18	1.15	1.21	0	122250	0.0179	0.133	1.86	1.68	2.06
Dehydration E86.0	2.64e-32	1.23	1.19	1.27	0	122250	0.0675	0.251	1.51	1.41	1.61
Mixed disorder of acid-base balance E87.4	3.88e-22	1.13	1.1	1.16	0	122250	0.00393	0.0625	2.67	2.19	3.26
Alkalosis E87.3	2.94e-20	1.14	1.11	1.17	0	122250	0.00693	0.0829	2.15	1.83	2.53
Hypovolemia E86.1	1.4e-12	1.11	1.08	1.14	0	122250	0.0131	0.114	1.59	1.4	1.8
Other fluid overload E87.79	9.04e-12	1.09	1.07	1.12	0	122250	0.00348	0.0589	2.16	1.73	2.69
