# Supplementary material for: Fluid, pH and electrolyte imbalance associated with COVID-19 mortality
Source: Research Square preprint supplement (doi:10.21203/rs.3.rs-145823/v1), 2021-03-08
Supplement: Supplementary file 7 [file d9e950c4388cee7bdc42090a.xlsx]

## Sheet: MainTableCox
	Combined multivariate model				Comorbidity model				Labs/vitals model				Univariate analysis
Variable	P	HR_2SD	LCL_2SD	UCL_2SD	P	HR_2SD	LCL_2SD	UCL_2SD	P	HR_2SD	LCL_2SD	UCL_2SD	P	HR_2SD	LCL_2SD	UCL_2SD	Transformation	N	mean	sd	HR	LCL	UCL
Age	2.54e-191	6.95	6.11	7.91	3.47e-284	8.89	7.9	10	1.52e-227	7.59	6.71	8.59	0	17.8	16.3	19.5	0	122250	52.7	19.8	1.08	1.07	1.08
Male gender	7.31e-41	1.82	1.66	1.98	9.76e-43	1.61	1.5	1.72	2.5e-43	1.85	1.7	2.02	2.39e-100	1.76	1.67	1.86	0	122250	0.447	0.497	1.77	1.68	1.87
Albumin	1.56e-18	0.731	0.682	0.784					1.18e-22	0.695	0.647	0.748	5.1e-112	0.471	0.442	0.503	0	46191	4	0.555	0.508	0.479	0.539
Red cell distribution width	7.29e-17	1.34	1.25	1.44					1.8e-22	1.41	1.31	1.51	4.86e-82	1.84	1.73	1.96	1	50295	2.63	0.113	14.7	11.2	19.4
Insurance status Uninsured	1.14e-16	1.26	1.19	1.33	1.9e-12	1.21	1.15	1.28	6.85e-16	1.25	1.18	1.32	2.69e-17	1.21	1.16	1.26	0	122250	0.0164	0.127	2.11	1.77	2.5
Blood urea nitrogen	5.21e-14	1.33	1.23	1.43					1.72e-15	1.35	1.26	1.46	2.58e-67	1.9	1.77	2.04	1	53846	2.75	0.441	2.07	1.91	2.25
Respiratory rate	6.43e-13	1.46	1.32	1.62					3.07e-14	1.48	1.34	1.64	5e-43	2.21	1.97	2.47	1	51169	2.83	0.156	12.6	8.81	18.2
Fluid, pH and electrolyte disorders (FPEI)	9.67e-12	1.3	1.21	1.41	1.71e-14	1.37	1.27	1.49					3.97e-76	1.51	1.45	1.58	0	122250	0.189	0.391	1.69	1.6	1.79
African-American race	1.3e-11	1.29	1.2	1.38					1.07e-07	1.22	1.14	1.32	3.27e-14	1.22	1.16	1.29	0	122250	0.21	0.407	1.28	1.2	1.37
Dementia	1.23e-08	1.15	1.09	1.2	1.76e-05	1.12	1.06	1.18					8.84e-22	1.17	1.13	1.21	0	122250	0.0622	0.242	1.38	1.29	1.48
Hemoglobin A1C	1.44e-08	1.23	1.15	1.33									4.28e-15	1.48	1.35	1.64	1	27169	1.84	0.204	2.64	2.07	3.36
Metastatic carcinoma	1.49e-08	1.15	1.09	1.2	5.84e-07	1.13	1.08	1.18					5.02e-11	1.11	1.08	1.15	0	122250	0.0178	0.132	1.5	1.33	1.7
INSURANCE status Medicare	2.96e-08	1.23	1.14	1.32					2.7e-09	1.25	1.16	1.34	4.14e-10	1.16	1.11	1.22	0	122250	0.197	0.398	1.21	1.14	1.28
Oxygen_saturation	1.41e-07	0.838	0.785	0.895					2.91e-09	0.819	0.767	0.875	7.99e-10	0.818	0.767	0.872	0	64154	97.5	1.66	0.941	0.923	0.959
Height	2.09e-07	0.79	0.723	0.864					8.08e-08	0.785	0.719	0.858	0.000689	0.832	0.748	0.925	0	61694	167	10.6	0.991	0.986	0.996
Moderate or severe liver disease	1.46e-06	1.11	1.07	1.16	3.05e-08	1.13	1.08	1.18					7.77e-27	1.17	1.14	1.21	0	122250	0.00685	0.0825	2.66	2.22	3.18
Triglycerides	8.04e-06	1.21	1.11	1.31					3.92e-08	1.26	1.16	1.36	4.78e-09	1.38	1.24	1.53	1	31566	4.71	0.509	1.37	1.23	1.52
Total carbon dioxide	8.7e-06	0.867	0.814	0.923									5.43e-15	0.763	0.713	0.817	0	51259	25.6	2.92	0.955	0.944	0.966
Congestive heart failure	1.08e-05	1.14	1.08	1.21	5.65e-12	1.23	1.16	1.31					1.97e-58	1.34	1.29	1.38	0	122250	0.101	0.301	1.62	1.53	1.72
Boostrix DTP vaccine	1.77e-05	0.843	0.78	0.912									8.91e-15	0.784	0.737	0.833	0	122250	0.266	0.442	0.759	0.708	0.814
Acidosis (E87.2)					3.01e-08	1.16	1.1	1.22					2.56e-81	1.34	1.3	1.39	0	122250	0.0479	0.214	2	1.86	2.15
Insurance status Commercial					4.09e-08	0.764	0.694	0.841					1.03e-20	0.709	0.66	0.762	0	122250	0.338	0.473	0.696	0.645	0.751
Renal disease					9.27e-08	1.18	1.11	1.26					1.27e-48	1.31	1.26	1.36	0	122250	0.105	0.307	1.55	1.46	1.64
Other neurological disorders					5.81e-06	1.18	1.1	1.26					5.3e-38	1.31	1.26	1.37	0	122250	0.144	0.351	1.47	1.39	1.56
Diabetes without complications					1.12e-05	1.16	1.09	1.24					3.05e-26	1.26	1.21	1.32	0	122250	0.193	0.395	1.34	1.27	1.42
Mixed disorder of acid-base balance (E87.4)					1.33e-05	1.08	1.05	1.12					3.88e-22	1.13	1.1	1.16	0	122250	0.00393	0.0625	2.67	2.19	3.26
Lymphoma					1.77e-05	1.1	1.05	1.15					1.62e-07	1.08	1.05	1.12	0	122250	0.00873	0.093	1.54	1.31	1.81
Herpes zoster					2.16e-05	0.875	0.822	0.93					0.0016	0.931	0.891	0.973	0	122250	0.0246	0.155	0.795	0.689	0.917
Glucose random									8.85e-14	1.31	1.22	1.4	6.52e-44	1.57	1.47	1.67	1	54036	4.7	0.295	2.14	1.92	2.38
Aspartate aminotransferase									5.26e-07	1.2	1.12	1.29	0.000101	1.16	1.08	1.25	1	46162	3.05	0.386	1.21	1.1	1.34
AST ALT ratio									1.16e-06	1.21	1.12	1.3	8.26e-09	1.15	1.1	1.2	1	122250	0.0908	0.249	1.32	1.2	1.45
Red blood cell count									1.94e-06	0.833	0.773	0.898	4.07e-60	0.567	0.53	0.607	0	50543	4.4	0.645	0.645	0.612	0.68
High sodium									1.64e-05	1.09	1.05	1.14

## Sheet: with_regions
	complete model				comorbidity model				lab vitals model				Univariate analysis
Variable	P	HR_2SD	LCL_2SD	UCL_2SD	P	HR_2SD	LCL_2SD	UCL_2SD	P	HR_2SD	LCL_2SD	UCL_2SD	P	HR_2SD	LCL_2SD	UCL_2SD	Transformation	N	mean	sd	HR	LCL	UCL
age	5.53e-181	6.71	5.89	7.64	4.31e-273	8.36	7.43	9.41	1.83e-218	7.45	6.58	8.44	0	17.8	16.3	19.5	0	122250	52.7	19.8	1.08	1.07	1.08
GENDER	1.55e-44	1.87	1.71	2.04	8.39e-44	1.62	1.51	1.73	1.72e-41	1.84	1.68	2.01	2.39e-100	1.76	1.67	1.86	0	122250	0.447	0.497	1.77	1.68	1.87
Blood_urea_nitrogen_.BUN.__mg_dl	2.37e-16	1.43	1.32	1.56					5e-18	1.46	1.34	1.59	2.58e-67	1.9	1.77	2.04	1	53846	2.75	0.441	2.07	1.91	2.25
Albumin__g_dl	4.64e-16	0.745	0.694	0.8					4e-27	0.687	0.642	0.735	5.1e-112	0.471	0.442	0.503	0	46191	4	0.555	0.508	0.479	0.539
South_South_Atl_West_South_Crl	3.99e-15	0.698	0.639	0.764	0.000158	0.843	0.771	0.921	7.14e-12	0.735	0.673	0.802	1.3e-18	0.728	0.678	0.781	0	122250	0.08	0.267	0.552	0.484	0.63
INSURANCE_Uninsured	5.73e-15	1.24	1.18	1.31	1.82e-13	1.22	1.16	1.29	9.63e-15	1.24	1.17	1.31	2.69e-17	1.21	1.16	1.26	0	122250	0.0164	0.127	2.11	1.77	2.5
Red_cell_distribution_width.CV_.RDW.CV.__.	1.59e-14	1.36	1.26	1.47					3.63e-18	1.4	1.3	1.52	4.86e-82	1.84	1.73	1.96	1	50295	2.63	0.113	14.7	11.2	19.4
FluidsLytes	5.37e-13	1.32	1.22	1.42	5.03e-21	1.45	1.34	1.57					3.97e-76	1.51	1.45	1.58	0	122250	0.189	0.391	1.69	1.6	1.79
RESP__breaths_min	7.38e-13	1.45	1.31	1.61					1.31e-13	1.47	1.33	1.63	5e-43	2.21	1.97	2.47	1	51169	2.83	0.156	12.6	8.81	18.2
Mean_corpuscular_hemoglobin_concentration_.MCHC.__g_dl	1.63e-12	0.732	0.671	0.798					5.47e-13	0.729	0.669	0.794	4.95e-35	0.639	0.595	0.686	0	49606	32.9	1.27	0.838	0.815	0.862
Hemoglobin_A1C__.	9.87e-12	1.29	1.2	1.39									4.28e-15	1.48	1.35	1.64	1	27169	1.84	0.204	2.64	2.07	3.36
Northeast_Middle_Atlantic	3.21e-11	0.749	0.687	0.815					3.32e-07	0.813	0.751	0.881	1.22e-06	0.868	0.82	0.919	0	122250	0.315	0.457	0.857	0.805	0.912
Midwest_West_North_Central	4.19e-11	0.768	0.71	0.831					3.61e-08	0.807	0.748	0.871	2.02e-06	0.864	0.813	0.918	0	122250	0.0927	0.285	0.774	0.696	0.86
Dementia	5.41e-09	1.15	1.1	1.21	6.7e-06	1.13	1.07	1.19					8.84e-22	1.17	1.13	1.21	0	122250	0.0622	0.242	1.38	1.29	1.48
Mets	1.69e-08	1.15	1.09	1.2	6.55e-07	1.13	1.08	1.18					5.02e-11	1.11	1.08	1.15	0	122250	0.0178	0.132	1.5	1.33	1.7
INSURANCE_Medicare	6.06e-08	1.22	1.14	1.32					6.4e-09	1.24	1.15	1.34	4.14e-10	1.16	1.11	1.22	0	122250	0.197	0.398	1.21	1.14	1.28
HT__cm	6.46e-08	0.782	0.715	0.855					1.43e-07	0.788	0.721	0.861	0.000689	0.832	0.748	0.925	0	61694	167	10.6	0.991	0.986	0.996
Mean_corpuscular_hemoglobin_.MCH.__pg	8.58e-08	1.26	1.16	1.37					4.14e-08	1.26	1.16	1.37	1.57e-08	0.814	0.758	0.874	0	49410	29.4	2.49	0.959	0.946	0.973
African	1.35e-07	1.22	1.14	1.32					1.72e-11	1.29	1.19	1.38	3.27e-14	1.22	1.16	1.29	0	122250	0.21	0.407	1.28	1.2	1.37
Oxygen_saturation_.SpO2..pulse_oximetry__.	2.28e-07	0.839	0.785	0.897					2.06e-07	0.839	0.785	0.897	7.99e-10	0.818	0.767	0.872	0	64154	97.5	1.66	0.941	0.923	0.959
Triglycerides_.TG.__mg_dl	6.41e-07	1.24	1.14	1.34					1.49e-07	1.25	1.15	1.35	4.78e-09	1.38	1.24	1.53	1	31566	4.71	0.509	1.37	1.23	1.52
LiverSevere	2.55e-06	1.11	1.06	1.16	1.82e-10	1.15	1.1	1.2					7.77e-27	1.17	1.14	1.21	0	122250	0.00685	0.0825	2.66	2.22	3.18
Carbon_dioxide.total_.CO2.__mmol_l	2.62e-06	0.86	0.808	0.916					4.4e-07	0.851	0.799	0.906	5.43e-15	0.763	0.713	0.817	0	51259	25.6	2.92	0.955	0.944	0.966
Potassium_.K.__mmol_l	4.49e-06	0.844	0.786	0.908					3.5e-06	0.842	0.783	0.906	1.65e-05	0.859	0.802	0.921	1	53811	1.42	0.0981	0.461	0.324	0.656
West_Mountain	1.85e-05	0.797	0.718	0.884					6.16e-05	0.809	0.73	0.898	0.000247	0.876	0.816	0.94	0	122250	0.0143	0.117	0.568	0.42	0.769
Northeast_New_England	2.06e-05	0.856	0.797	0.92									0.00113	1.09	1.03	1.14	0	122250	0.13	0.331	1.13	1.05	1.22
IMM_58160084252	2.4e-05	0.845	0.782	0.914									8.91e-15	0.784	0.737	0.833	0	122250	0.266	0.442	0.759	0.708	0.814
South_East_South_Central	5.07e-05	0.856	0.794	0.923									0.504	0.983	0.934	1.03	0	122250	0.0189	0.134	0.937	0.774	1.13
Midwest_East_North_Central					2.22e-26	1.43	1.34	1.53					4.38e-32	1.36	1.29	1.43	0	122250	0.304	0.453	1.41	1.33	1.49
CHF					4.02e-11	1.22	1.15	1.3					1.97e-58	1.34	1.29	1.38	0	122250	0.101	0.301	1.62	1.53	1.72
Renal					1.06e-09	1.21	1.14	1.28					1.27e-48	1.31	1.26	1.36	0	122250	0.105	0.307	1.55	1.46	1.64
INSURANCE_Commercial					7.56e-08	0.768	0.698	0.846					1.03e-20	0.709	0.66	0.762	0	122250	0.338	0.473	0.696	0.645	0.751
NeuroOther					7.01e-07	1.19	1.11	1.28					5.3e-38	1.31	1.26	1.37	0	122250	0.144	0.351	1.47	1.39	1.56
DM					4.71e-06	1.17	1.09	1.25					3.05e-26	1.26	1.21	1.32	0	122250	0.193	0.395	1.34	1.27	1.42
Herpes_Zoster					9.57e-06	0.87	0.817	0.925					0.0016	0.931	0.891	0.973	0	122250	0.0246	0.155	0.795	0.689	0.917
COPD					1.12e-05	1.13	1.07	1.19					2.4e-30	1.23	1.18	1.27	0	122250	0.0876	0.283	1.44	1.35	1.53
Lymphoma					1.73e-05	1.1	1.05	1.15					1.62e-07	1.08	1.05	1.12	0	122250	0.00873	0.093	1.54	1.31	1.81
Glucose.random__mg_dl									1.2e-15	1.33	1.24	1.43	6.52e-44	1.57	1.47	1.67	1	54036	4.7	0.295	2.14	1.92	2.38
AST_ALT									4.9e-06	1.2	1.11	1.29	8.26e-09	1.15	1.1	1.2	1	122250	0.0908	0.249	1.32	1.2	1.45
Aspartate_aminotransferase_.AST.__u_l									7.08e-06	1.18	1.1	1.27	0.000101	1.16	1.08	1.25	1	46162	3.05	0.386	1.21	1.1	1.34
PACK_YEARS__NA									6.47e-05	1.1	1.05	1.16	2.81e-08	1.85	1.49	2.29	1	9554	2.4	1.36	1.25	1.16	1.36
N_comorb													0	22.1	19.7	24.8	1	122250	1.11	1.28	3.34	3.19	3.49
charlson_score													0	3.62	3.38	3.86	1	122250	0.233	1.01	1.89	1.83	1.95
Hemoglobin_.HGB.__g_dl													2.9e-89	0.502	0.469	0.537	0	50984	12.9	1.93	0.836	0.822	0.851
ePVS													4.71e-84	1.49	1.43	1.55	1	122250	1.58	0.158	3.51	3.09	3.98
E872													2.56e-81	1.34	1.3	1.39	0	122250	0.0479	0.214	2	1.86	2.15
AcidBaseBalance													3.42e-77	1.45	1.4	1.51	0	122250	0.141	0.348	1.71	1.62	1.81
Hematocrit_.HCT.__.													2.57e-75	0.541	0.507	0.578	0	50883	39.2	5.36	0.944	0.939	0.95
Red_blood_cell_count_.RBC.__x10.6_ul													4.07e-60	0.567	0.53	0.607	0	50543	4.4	0.645	0.645	0.612	0.68
LLR													1.78e-59	0.678	0.647	0.711	0	122250	0.259	0.0627	0.0452	0.0311	0.0656
Calcium.total__mg_dl													8.85e-58	0.588	0.551	0.627	0	53348	9.28	0.523	0.602	0.565	0.64
VolumeUp													8.85e-57	1.31	1.26	1.35	0	122250	0.0675	0.251	1.7	1.59	1.81
VolumeDown													3.72e-50	1.3	1.26	1.35	0	122250	0.0839	0.277	1.61	1.51	1.72
NLR													3.41e-46	1.37	1.31	1.43	1	122250	1.11	0.411	1.47	1.39	1.55
E875													2.29e-43	1.24	1.21	1.28	0	122250	0.046	0.209	1.68	1.56	1.81
WithoutComorb													2.29e-43	0.0608	0.0408	0.0904	0	122250	0.222	0.416	0.0345	0.0214	0.0556
Lymphocyte.percent__.													2.45e-43	0.558	0.514	0.606	0	45361	26.2	10.6	0.973	0.969	0.977
E871													5.65e-43	1.26	1.22	1.3	0	122250	0.058	0.234	1.63	1.52	1.75
DMcx													1.21e-38	1.27	1.23	1.32	0	122250	0.0977	0.297	1.5	1.41	1.59
E8770													3.33e-35	1.19	1.16	1.22	0	122250	0.0168	0.128	1.97	1.77	2.2
E876													5.83e-34	1.26	1.22	1.31	0	122250	0.0965	0.295	1.48	1.39	1.58
E870													1.04e-33	1.18	1.15	1.21	0	122250	0.0179	0.133	1.86	1.68	2.06
Neutrophil.percent__.													1.3e-33	1.6	1.48	1.72	0	45373	62.1	11.6	1.02	1.02	1.02
E860													2.64e-32	1.23	1.19	1.27	0	122250	0.0675	0.251	1.51	1.41	1.61
Cholesterol.HDL__mg_dl													2.8e-32	0.6	0.552	0.653	1	31677	3.89	0.302	0.43	0.374	0.494
Creatinine__mg_dl													1.12e-31	1.51	1.41	1.61	1	53226	-0.107	0.326	1.88	1.69	2.09
Coagulopathy													3.63e-30	1.22	1.18	1.26	0	122250	0.0611	0.24	1.51	1.4	1.62
Anemia													1.29e-29	1.3	1.24	1.36	0	122250	0.206	0.404	1.38	1.3	1.46
Neutrophil.absolute__x10.3_ul													7.74e-29	1.53	1.42	1.65	1	45203	1.47	0.464	1.59	1.46	1.72
White_blood_cell_count_.WBC.__x10.3_ul													8.81e-27	1.48	1.37	1.59	1	50568	1.96	0.333	1.79	1.61	2
Alkaline_phosphatase.total_.ALP.__u_l													2.67e-26	1.51	1.4	1.62	1	45297	4.33	0.332	1.85	1.65	2.07
MI													2.49e-25	1.19	1.15	1.23	0	122250	0.0638	0.244	1.42	1.33	1.52
Hypotension													8.47e-24	1.18	1.14	1.22	0	122250	0.0571	0.232	1.43	1.34	1.54
WeightLoss													1.88e-22	1.19	1.15	1.23	0	122250	0.0741	0.262	1.39	1.3	1.49
E874													3.88e-22	1.13	1.1	1.16	0	122250	0.00393	0.0625	2.67	2.19	3.26
Arrhythmia													3.62e-21	1.26	1.2	1.32	0	122250	0.234	0.424	1.31	1.24	1.39
E873													2.94e-20	1.14	1.11	1.17	0	122250	0.00693	0.0829	2.15	1.83	2.53
Psychoses													6.51e-17	1.19	1.14	1.24	0	122250	0.0812	0.273	1.37	1.27	1.47
DBP__mm_Hg													1.43e-16	0.711	0.655	0.771	0	66712	75	9.39	0.982	0.978	0.986
Lymphocyte.absolute__x10.3_ul													3.56e-16	0.701	0.643	0.763	0	44870	1.83	0.747	0.788	0.745	0.835
PVD													1.24e-15	1.17	1.12	1.21	0	122250	0.116	0.32	1.27	1.2	1.35
Valvular													3.23e-15	1.16	1.12	1.21	0	122250	0.111	0.314	1.27	1.2	1.35
Cholesterol.total__mg_dl													1.05e-14	0.642	0.573	0.718	0	31818	177	42.1	0.995	0.993	0.996
Obesity													2.61e-14	1.22	1.16	1.29	0	122250	0.283	0.451	1.25	1.18	1.32
Pulmonary													4.3e-14	1.2	1.15	1.26	0	122250	0.25	0.433	1.24	1.17	1.31
PULSE__bpm													4.65e-14	1.36	1.26	1.48	1	64073	4.35	0.159	2.66	2.06	3.43
IMM_70461031903													1.19e-13	0.816	0.773	0.861	0	122250	0.385	0.487	0.811	0.768	0.857
Erythrocyte_sedimentation_rate_.ESR.__mm_hr													1.2e-13	2.42	1.92	3.06	1	6360	2.85	1.12	1.48	1.34	1.65
Stroke													1.99e-13	1.15	1.11	1.19	0	122250	0.107	0.309	1.25	1.18	1.33
Globulin__g_dl													2.16e-13	1.52	1.36	1.7	1	20619	1.07	0.194	2.97	2.22	3.96
Protein.total__g_dl													5.45e-13	0.768	0.714	0.825	0	45641	7.11	0.619	0.808	0.762	0.856
PHTN													7.94e-13	1.12	1.09	1.16	0	122250	0.0237	0.152	1.47	1.32	1.63
E861													1.4e-12	1.11	1.08	1.14	0	122250	0.0131	0.114	1.59	1.4	1.8
IMM_ZOSTER													1.66e-12	0.856	0.82	0.894	0	122250	0.0551	0.228	0.711	0.647	0.782
Iron_binding_capacity.total_.TIBC.__ug_dl													2.72e-12	0.527	0.44	0.63	0	7064	307	85.4	0.996	0.995	0.997
C.reactive_protein_.CRP.__mg_l													4.26e-12	1.95	1.61	2.36	1	6659	2.13	1.63	1.23	1.16	1.3
Glomerular_filtration_rate1.73_sq_M.predicted.black__NA													5.9e-12	0.227	0.149	0.346	0	2239	79.6	36.6	0.98	0.974	0.986
E8779													9.04e-12	1.09	1.07	1.12	0	122250	0.00348	0.0589	2.16	1.73	2.69
Cholesterol.LDL__mg_dl													3.29e-11	0.679	0.605	0.761	0	31695	99.9	35.4	0.995	0.993	0.996
Paralysis													4.08e-11	1.11	1.08	1.15	0	122250	0.0233	0.151	1.42	1.28	1.58
HTN													1.33e-09	1.21	1.14	1.29	0	122250	0.396	0.489	1.22	1.14	1.3
Depression													1.87e-09	1.16	1.1	1.21	0	122250	0.197	0.398	1.2	1.13	1.28
Glomerular_filtration_rate1.73_sq_M.predicted__NA													3.83e-09	0.385	0.28	0.529	0	6694	95	27.2	0.983	0.977	0.988
Monocyte.absolute__x10.3_ul													3.94e-09	1.25	1.16	1.35	1	44748	-0.572	0.374	1.35	1.22	1.5
LiverMild													6.24e-09	1.14	1.09	1.19	0	122250	0.0869	0.282	1.26	1.17	1.36
IMM_00005197105													9.39e-09	0.886	0.85	0.923	0	122250	0.105	0.306	0.821	0.768	0.878
ELR													1.16e-08	0.882	0.845	0.921	1	122250	-3.75	0.415	0.86	0.816	0.905
Ferritin__ng_ml													1.21e-08	1.66	1.39	1.97	1	7593	4.46	1.41	1.2	1.12	1.27
E869													2.72e-07	1.08	1.05	1.11	0	122250	0.00663	0.0812	1.59	1.33	1.9
Bilirubin.direct__mg_dl													3.58e-07	1.38	1.22	1.56	1	10110	-1.79	0.534	1.35	1.2	1.52
AlbuminGlobulin__calc													3.96e-07	0.278	0.169	0.456	0	1709	1.58	0.289	0.11	0.0466	0.257
Erythrocyte_distribution_width__fl													4.06e-07	1.69	1.38	2.08	1	4902	3.81	0.119	9.13	3.88	21.5
Troponin.I_.TNI.__ng_ml													4.2e-07	1.34	1.2	1.5	1	8159	-3.9	0.855	1.19	1.11	1.27
Iron__ug_dl													4.54e-07	0.681	0.587	0.791	1	7829	3.99	0.625	0.736	0.653	0.829
Natriuretic_peptide.B_.BNP.__pg_ml													6.36e-07	1.62	1.34	1.96	1	4425	4.63	1.36	1.19	1.11	1.28
Hypertension													8.78e-07	1.17	1.1	1.25	0	122250	0.402	0.49	1.17	1.1	1.25
Natriuretic_peptide.proBNP_.NT.proBNP.__pg_ml													2.16e-06	1.76	1.39	2.23	1	2897	6.16	1.7	1.18	1.1	1.27
INSURANCE_Medicaid													2.53e-06	1.16	1.09	1.23	0	122250	0.0769	0.266	1.32	1.18	1.48
ALCOHOL__NA													2.98e-06	0.768	0.685	0.845	0	39092	6220	2100	1	1	1
Glomerular_filtration_rate1.73_sq_M.predicted__ml_min_1.73m2													6.58e-06	0.469	0.337	0.652	0	6048	84.7	23.4	0.984	0.977	0.991
IMM_00006489700													1.91e-05	1.16	1.08	1.24	0	122250	0.00303	0.055	3.88	2.08	7.21
Caucasian													2.24e-05	0.886	0.838	0.937	0	122250	0.533	0.499	0.886	0.838	0.937
Sodium_.Na.__mmol_l													2.45e-05	0.874	0.821	0.93	0	53717	139	2.67	0.975	0.964	0.987
IMM_49281054505													4.4e-05	1.2	1.1	1.32	0	122250	0.00669	0.0815	3.12	1.81	5.38
Osmolality__mOsm_kg													5.32e-05	1.45	1.21	1.73	1	5102	5.65	0.0383	126	12.1	1320
Vitamin_D._25.OH.total_.VIT_D.__ng_ml													7.04e-05	0.73	0.625	0.853	1	13033	3.31	0.491	0.726	0.62	0.85
Drugs													8.19e-05	1.11	1.05	1.16	0	122250	0.0373	0.19	1.31	1.14	1.5
Protein.urine.concentration__mg_dl													9.06e-05	1.73	1.32	2.28	1	2032	3.2	1.18	1.26	1.12	1.42
BloodLoss													9.85e-05	1.09	1.04	1.13	0	122250	0.0383	0.192	1.24	1.11	1.38
Eosinophil.percent__.													0.000105	0.868	0.808	0.932	1	43363	0.672	0.732	0.908	0.865	0.953
Estimated_average_glucose__mg_dl													0.000138	1.82	1.34	2.47	1	2334	4.83	0.246	3.35	1.8	6.24
Urobilinogen.urine.dipstick__mg_dl													0.00021	1.45	1.19	1.77	1	5531	-1.11	0.856	1.24	1.11	1.4
Asian													0.000243	1.11	1.05	1.17	0	122250	0.0304	0.172	1.35	1.15	1.59
Albumin.urine.concentration__mg_dl													0.000252	1.51	1.21	1.89	1	6159	0.43	1.1	1.21	1.09	1.34
Troponin.T_.TNT.__ng_ml													0.000284	1.48	1.2	1.82	1	2068	-3.83	0.668	1.34	1.14	1.57
Pertussis													0.000303	1.05	1.02	1.08	0	122250	0.000204	0.0143	6.1	2.29	16.3
Glomerular_filtration_rate1.73_sq_M.predicted.non_black__ml_min_1.73m2													0.00036	0.448	0.288	0.696	0	1829	52.3	25.7	0.984	0.976	0.993
Thyroxine.free_.FT4.__ng_dl													0.000436	0.734	0.618	0.872	0	8760	1.11	0.257	0.548	0.392	0.766
Glomerular_filtration_rate1.73_sq_M.predicted.black__ml_min_1.73m2													0.000481	0.373	0.215	0.649	0	1586	67.9	35	0.986	0.978	0.994
HR__bpm													0.000561	1.27	1.11	1.46	1	15552	4.35	0.17	2.02	1.36	3.01
Albumincreatinine_ratio.urine__mg_g													0.000703	1.53	1.2	1.95	1	5329	2.65	1.27	1.18	1.07	1.3
WT__kg													0.00095	1.17	1.07	1.28	0	65427	85.5	24.5	1	1	1.01
Triiodothyronine.total_.T3.__ng_dl													0.00106	0.376	0.209	0.676	0	1147	100	28.7	0.983	0.973	0.993
Fibrin_D.Dimer__NA													0.00148	1.77	1.24	2.52	1	1688	2.65	3.29	1.09	1.03	1.15
BMI__NA													0.00169	1.15	1.05	1.25	1	64941	3.39	0.244	1.33	1.11	1.59
Partial_thromboplastin_time_.PTT.__sec													0.00178	1.18	1.06	1.3	1	9135	3.47	0.233	1.41	1.14	1.76
Monocyte.percent__.													0.00235	0.897	0.837	0.962	0	45076	8.25	2.45	0.978	0.964	0.992
Ethanol.concentration__mg_dl													0.00258	0.502	0.32	0.786	1	1650	2.87	1.39	0.78	0.664	0.917
Creatinine.urine.concentration__mg_dl													0.0029	0.8	0.691	0.927	1	10377	4.55	0.69	0.851	0.765	0.946
IMM_00006494300													0.00482	0.94	0.901	0.981	0	122250	0.13	0.336	0.912	0.856	0.972
Cholesterol.totalHDL_ratio__no_units													0.00518	1.2	1.06	1.37	1	23392	1.25	0.305	1.35	1.09	1.67
Procalcitonin_.PCT.__ng_ml													0.00739	1.29	1.07	1.55	1	2481	-1.87	1.23	1.11	1.03	1.2
Testosterone.total__ng_dl													0.00765	0.24	0.0839	0.684	0	1496	286	238	0.997	0.995	0.999
Prothrombin_time_.PT.__sec													0.00788	1.13	1.03	1.24	1	12448	2.62	0.263	1.26	1.06	1.5
Platelet_count_.PLT.__x10.3_ul													0.0082	0.903	0.837	0.974	0	50511	247	73.6	0.999	0.999	1
Parathyroid_hormone_.PTH.__pg_ml													0.00931	1.38	1.08	1.77	1	2659	4.42	0.928	1.19	1.04	1.36
Cancer													0.00935	1.05	1.01	1.09	0	122250	0.0891	0.285	1.09	1.02	1.17
Cholesterol.in_VLDL__mg_dl													0.0127	1.67	1.12	2.49	1	4665	3.08	0.49	1.68	1.12	2.54
Transferrin_saturation__.													0.0149	0.815	0.691	0.961	1	6870	2.89	0.639	0.852	0.749	0.969
Chloride_.Cl.__mmol_l													0.0174	1.08	1.01	1.15	0	53593	103	3.56	1.01	1	1.02
Self_Monitored_Blood_Glucose_.SMBG.__NA													0.0175	1.7	1.1	2.64	0	1370	3.29	1.01	1.3	1.05	1.61
Granulocytes.immature100_leukocytes__.													0.0187	1.4	1.06	1.85	1	1965	0.0263	0.254	1.94	1.12	3.37
Oxygen_saturation_.SO2..other.performed__.													0.0202	1.22	1.03	1.44	0	4205	67.8	23.9	1	1	1.01
Granulocytes.immature__x10.3_ul													0.0209	1.37	1.05	1.8	0	1631	0.105	0.0398	53.5	1.83	1570
Basophil.absolute__x10.3_ul													0.0235	1.1	1.01	1.19	1	33620	-2.98	0.637	1.08	1.01	1.15
UROUT__ml													0.0247	0.86	0.753	0.981	0	9340	288	194	1	0.999	1
Alcohol													0.0248	1.05	1.01	1.1	0	122250	0.0314	0.174	1.16	1.02	1.32
Metamyelocyte.percent__.													0.0261	0.731	0.555	0.963	1	1579	0.426	0.514	0.738	0.564	0.964
Reticulocyte.percent__.													0.0265	1.38	1.04	1.84	1	1470	0.59	0.599	1.31	1.03	1.67
Lactic_acid__mmol_l													0.0319	1.14	1.01	1.28	1	8392	0.341	0.408	1.17	1.01	1.35
LVEF__.													0.0443	0.879	0.775	0.997	0	7948	55.4	12.8	0.995	0.99	1
Anion_gap__mmol_l													0.0459	1.09	1	1.18	0	40495	9.85	3.26	1.01	1	1.03
Protein.urine.dipstick__mg_dl													0.0476	1.17	1	1.38	1	4783	3.83	0.622	1.14	1	1.29
Immunoglobulin_M_.IgM..quantitative__mg_dl													0.0555	0.727	0.525	1.01	1	1022	4.16	0.803	0.82	0.669	1
Phosphorus_.PO4.__mg_dl													0.0621	1.11	0.995	1.25	1	9158	1.23	0.247	1.24	0.989	1.56
Oxygen_saturation_.SO2..other.performed__mm_Hg													0.0622	1.18	0.992	1.4	1	3742	3.72	0.376	1.25	0.989	1.57
Glucose.urine.dipstick__mg_dl													0.0625	1.33	0.985	1.81	1	1484	5.09	0.86	1.18	0.991	1.41
Hepatitis_C_antibody_sco_ratio_.HCV..quantitative__no_units													0.0631	1.82	0.968	3.44	1	1190	-3.35	0.979	1.36	0.983	1.88
Vancomycin.trough__ug_ml													0.0678	1.27	0.983	1.65	0	1380	15.4	6.15	1.02	0.999	1.04
Gamma.glutamyl_transferase_.GGT.__u_l													0.0699	1.35	0.976	1.86	1	1574	3.52	0.964	1.17	0.987	1.38
Triiodothyronine.free_.FT3.__pg_ml													0.0755	0.658	0.415	1.04	0	1772	2.9	0.568	0.692	0.461	1.04
Sodium_.Na..urine.concentration__mmol_l													0.0768	0.806	0.635	1.02	1	1507	3.84	0.71	0.859	0.727	1.02
Carbon_dioxide__mm_Hg													0.0788	0.757	0.556	1.03	1	1180	3.7	0.192	0.486	0.217	1.09
Epithelial_cells.urine.microscopic__NA													0.0812	1.51	0.95	2.39	1	1161	0.936	0.994	1.23	0.975	1.55
Human_chorionic_gonadotropin_.HCG..quantitative__u_l													0.0902	0.0981	0.00669	1.44	1	1912	3.17	3.78	0.736	0.516	1.05
Red_blood_cells_.RBC..urine.microscopic__NA													0.0939	1.3	0.957	1.75	1	1399	0.957	0.873	1.16	0.975	1.38
Magnesium_.Mg.__mg_dl													0.104	1.08	0.984	1.19	0	13910	1.97	0.252	1.17	0.969	1.4
Acetaminophen__ug_ml													0.107	0.646	0.38	1.1	1	1037	1.49	0.791	0.759	0.542	1.06
Bands.percent__.													0.12	1.16	0.963	1.39	1	2881	1.06	0.862	1.09	0.978	1.21
pH__no_units													0.123	1.27	0.936	1.73	0	1103	7.4	0.0601	7.42	0.579	95.2
Hypothyroid													0.124	1.03	0.991	1.08	0	122250	0.123	0.328	1.05	0.986	1.13
Transferrin.direct__mg_dl													0.129	0.769	0.548	1.07	0	1649	237	71.7	0.998	0.996	1
Ketones.urine.dipstick__mg_dl													0.134	0.769	0.546	1.08	1	1501	2.77	0.792	0.847	0.682	1.05
Immunoglobulin_A_.IgA..quantitative__mg_dl													0.137	0.784	0.568	1.09	0	1599	223	136	0.999	0.998	1
Cholesterol.non.HDL__mg_dl													0.14	0.894	0.77	1.04	1	15193	4.79	0.329	0.843	0.672	1.06
PUD													0.143	1.03	0.991	1.07	0	122250	0.0263	0.16	1.09	0.971	1.23
Rheumatoid_factor_.RF..quantitative__u_ml													0.144	1.44	0.883	2.36	1	1478	2.52	0.342	1.71	0.833	3.5
Thyroxine.total_.T4.__ug_dl													0.153	0.661	0.375	1.17	0	1611	7.42	1.94	0.899	0.776	1.04
PH.arterial_blood__no_units													0.156	0.876	0.73	1.05	0	2682	7.39	0.0693	0.386	0.103	1.44
Immunoglobulin_G_.IgG..quantitative__mg_dl													0.165	0.821	0.622	1.08	1	1228	6.93	0.462	0.808	0.598	1.09
FEV1_FVC_RATIO__.													0.178	0.732	0.465	1.15	0	1004	67.7	18.6	0.992	0.98	1
Uric_acid__mg_dl													0.184	1.18	0.926	1.49	1	3859	1.72	0.351	1.26	0.896	1.77
Platelet_mean_volume_.MPV.__fl													0.189	0.945	0.869	1.03	0	36567	9.78	1.34	0.979	0.949	1.01
Oxygen_saturation_.SO2..arterial_blood__.													0.231	0.887	0.729	1.08	0	2239	95.6	3.12	0.981	0.951	1.01
Hispanic													0.242	0.956	0.886	1.03	0	122250	0.138	0.345	0.937	0.839	1.05
Basophil.percent__.													0.25	0.956	0.885	1.03	0	40458	0.737	0.344	0.937	0.838	1.05
Casts.urine.microscopic___lpf													0.25	0.857	0.66	1.11	1	1847	1.01	0.818	0.91	0.776	1.07
Rheumatic													0.253	1.02	0.983	1.07	0	122250	0.0309	0.173	1.07	0.951	1.21
Lymphocyte.atypical.percent__.													0.267	0.842	0.622	1.14	1	1296	0.621	0.637	0.874	0.689	1.11
Rubella.performed__other_unit													0.268	0.392	0.075	2.05	1	1175	1.66	1.03	0.636	0.285	1.42
Prothrombin.INR__no_units													0.28	1.05	0.961	1.15	1	13421	0.179	0.286	1.09	0.933	1.27
PH.urine.dipstick__no_units													0.283	1.05	0.962	1.14	1	30296	1.79	0.131	1.19	0.864	1.65
Red_blood_cells_.RBC..urine.microscopic___hpf													0.288	1.09	0.93	1.28	1	6593	0.973	0.905	1.05	0.961	1.15
Glucose.fasting__mg_dl													0.29	1.23	0.839	1.8	1	2514	4.61	0.23	1.57	0.682	3.59
Epithelial_cells.urine.microscopic___hpf													0.294	0.873	0.678	1.12	1	4127	0.668	0.784	0.917	0.781	1.08
Varicella													0.304	0.959	0.887	1.04	0	122250	0.00122	0.0349	0.553	0.178	1.71
White_blood_cells_.WBC..urine.microscopic__NA													0.33	1.17	0.851	1.62	1	1467	1.46	1.22	1.07	0.936	1.22
Carbon_dioxide.partial_pressure_.PCO2..arterial_blood__mm_Hg													0.345	1.1	0.905	1.33	1	2632	3.72	0.253	1.2	0.822	1.75
Specific_gravity.urine.dipstick__no_units													0.366	0.957	0.869	1.05	1	29803	0.0177	0.00732	0.049	7.07e-05	33.9
West_Pacific													0.366	0.965	0.894	1.04	0	122250	0.0451	0.204	0.918	0.761	1.11
Lactate_dehydrogenase.total_.LDH.__u_l													0.387	1.09	0.893	1.34	1	3116	5.44	0.428	1.11	0.876	1.41
Asthma													0.399	1.02	0.97	1.08	0	122250	0.0799	0.271	1.04	0.946	1.15
Alanine_aminotransferase_.ALT.__u_l													0.403	0.967	0.893	1.05	1	46339	3.01	0.531	0.969	0.899	1.04
Oxygen.partial_pressure_.PO2..arterial_blood__mm_Hg													0.411	0.918	0.748	1.13	1	2551	4.48	0.428	0.905	0.712	1.15
Amylase.total__u_l													0.416	1.16	0.81	1.66	1	1471	4.02	0.527	1.15	0.819	1.62
Creatine_kinase.total_.CK.__u_l													0.427	1.07	0.908	1.26	1	4995	4.64	0.811	1.04	0.942	1.15
ABO_A													0.501	0.967	0.876	1.07	0	16593	0.357	0.479	0.965	0.87	1.07
Ammonia_.NH3.__umol_l													0.504	1.1	0.838	1.43	1	1429	3.48	0.555	1.09	0.853	1.38
Folate__ng_ml													0.511	0.942	0.787	1.13	1	5204	2.57	0.473	0.938	0.776	1.13
Prostate_specific_antigen.total_.PSA.__ng_ml													0.516	0.94	0.78	1.13	1	5984	-0.106	1.14	0.973	0.897	1.06
ESTIMATED_AVERAGE_GLUCOSE__mg_dl													0.556	0.895	0.619	1.29	1	1976	4.93	0.236	0.79	0.361	1.73
PAIN__out_of_10													0.59	0.972	0.877	1.08	0	33513	2.83	3.09	0.995	0.979	1.01
Mean_corpuscular_volume_.MCV.__fl													0.591	0.981	0.913	1.05	0	50454	89.4	6.42	0.998	0.993	1
HIV													0.613	1.01	0.961	1.07	0	122250	0.00496	0.0702	1.1	0.755	1.61
SBP__mm_Hg													0.615	1.02	0.945	1.1	1	66718	4.83	0.12	1.08	0.79	1.49
Vitamin_B12__pg_ml													0.623	1.03	0.903	1.19	1	9614	6.3	0.52	1.03	0.907	1.18
Blood_urea_nitrogencreatinine_ratio_.BUNCREA.__no_units													0.644	0.971	0.859	1.1	1	15513	2.79	0.392	0.964	0.823	1.13
White_blood_cells_.WBC..urine.microscopic___hpf													0.653	0.965	0.827	1.13	1	7491	1.38	1.2	0.985	0.924	1.05
Myelocyte.percent__.													0.659	1.07	0.8	1.42	1	1319	0.405	0.514	1.07	0.805	1.41
Bicarbonate_.HCO3..arterial_blood__mmol_l													0.702	1.04	0.865	1.24	0	2898	25.2	5.49	1	0.987	1.02
Thyroid_stimulating_hormone_.TSH.__uu_ml													0.716	0.982	0.893	1.08	1	27817	0.466	0.76	0.988	0.928	1.05
Lipase__u_l													0.741	1.03	0.882	1.19	1	8517	3.59	0.85	1.02	0.929	1.11
Bilirubin.total__mg_dl													0.753	0.987	0.912	1.07	1	45332	-0.759	0.49	0.987	0.911	1.07
Hepatitis_B_surface_antibody_.HBsAb.__mu_ml													0.773	1.07	0.665	1.73	1	1400	3.35	2.21	1.02	0.912	1.13
Calcium.ionized__mg_dl													0.794	0.976	0.81	1.17	0	3659	4.67	0.394	0.969	0.765	1.23
Eosinophil.absolute__x10.3_ul													0.872	0.994	0.923	1.07	1	41886	-1.93	0.667	0.995	0.942	1.05
Base_excessdeficit.arterial_blood__mmol_l													0.883	0.985	0.808	1.2	1	2273	1.08	0.853	0.991	0.883	1.11
Bicarbonate_.HCO3.__mmol_l													0.883	0.989	0.85	1.15	0	6260	25.5	4.03	0.999	0.98	1.02
TEMP__deg_c													0.938	0.997	0.916	1.08	1	57223	3.6	0.00779	0.806	0.00359	181
Reticulocyte.absolute__x10.3_ul													0.98	1	0.698	1.45	0	1052	73.1	43	1	0.996	1

## Sheet: just_regions
	Univariate analysis											complete model				comorbidity model				lab vitals model				Univariate analysis
Variable	P	HR_2SD	LCL_2SD	UCL_2SD	Transformation	N	mean	sd	HR	LCL	UCL	P	HR_2SD	LCL_2SD	UCL_2SD	P	HR_2SD	LCL_2SD	UCL_2SD	P	HR_2SD	LCL_2SD	UCL_2SD	P	HR_2SD	LCL_2SD	UCL_2SD	Transformation	N	mean	sd	HR	LCL	UCL
South_South_Atl_West_South_Crl	1.3e-18	0.728	0.678	0.781	0	122250	0.08	0.267	0.552	0.484	0.63	3.99e-15	0.698	0.639	0.764	0.000158	0.843	0.771	0.921	7.14e-12	0.735	0.673	0.802	1.3e-18	0.728	0.678	0.781	0	122250	0.08	0.267	0.552	0.484	0.63
Northeast_Middle_Atlantic	1.22e-06	0.868	0.82	0.919	0	122250	0.315	0.457	0.857	0.805	0.912	3.21e-11	0.749	0.687	0.815					3.32e-07	0.813	0.751	0.881	1.22e-06	0.868	0.82	0.919	0	122250	0.315	0.457	0.857	0.805	0.912
Midwest_West_North_Central	2.02e-06	0.864	0.813	0.918	0	122250	0.0927	0.285	0.774	0.696	0.86	4.19e-11	0.768	0.71	0.831					3.61e-08	0.807	0.748	0.871	2.02e-06	0.864	0.813	0.918	0	122250	0.0927	0.285	0.774	0.696	0.86
West_Mountain	0.000247	0.876	0.816	0.94	0	122250	0.0143	0.117	0.568	0.42	0.769	1.85e-05	0.797	0.718	0.884					6.16e-05	0.809	0.73	0.898	0.000247	0.876	0.816	0.94	0	122250	0.0143	0.117	0.568	0.42	0.769
Northeast_New_England	0.00113	1.09	1.03	1.14	0	122250	0.13	0.331	1.13	1.05	1.22	2.06e-05	0.856	0.797	0.92									0.00113	1.09	1.03	1.14	0	122250	0.13	0.331	1.13	1.05	1.22
South_East_South_Central	0.504	0.983	0.934	1.03	0	122250	0.0189	0.134	0.937	0.774	1.13	5.07e-05	0.856	0.794	0.923									0.504	0.983	0.934	1.03	0	122250	0.0189	0.134	0.937	0.774	1.13
Midwest_East_North_Central	4.38e-32	1.36	1.29	1.43	0	122250	0.304	0.453	1.41	1.33	1.49					2.22e-26	1.43	1.34	1.53					4.38e-32	1.36	1.29	1.43	0	122250	0.304	0.453	1.41	1.33	1.49
West_Pacific	0.366	0.965	0.894	1.04	0	122250	0.0451	0.204	0.918	0.761	1.11
