# Supplementary material for: Fluid, pH and electrolyte imbalance associated with COVID-19 mortality
Source: Research Square preprint supplement (doi:10.21203/rs.3.rs-145823/v1), 2021-03-08
Supplement: Supplementary file 9 [file 34ad40259c7818a638e92cc1.xlsx]

## Sheet: SuppTable
	all patients					age <=50					age 50 to 70					age 70 to 80					age 80 to 90
variable	N	P	OR_2SD	LCL_2D	UCL_2D	N	P	OR_2SD	LCL_2D	UCL_2D	N	P	OR_2SD	LCL_2D	UCL_2D	N	P	OR_2SD	LCL_2D	UCL_2D	N	P	OR_2SD	LCL_2D	UCL_2D	minP
N_comorb	122250	0	22.1377	19.7395	24.8278	52954	9.07e-96	87.7819	57.5384	133.921	42915	4.01e-276	32.9231	27.1476	39.9278	13658	1.07e-148	11.2067	9.33847	13.449	12723	1.09e-81	3.45304	3.04148	3.92025	0
age	122250	0	17.8452	16.3361	19.4935	52954	1.7e-21	5.45905	3.84762	7.74573	42915	3.64e-45	2.29494	2.04562	2.5767	13658	8.57e-13	1.43658	1.30082	1.5865	12723	2.45e-10	1.30738	1.20318	1.42086	0
charlson_score	122250	9.07e-314	3.61568	3.38301	3.86456	52954	7.95e-71	4.77231	4.01762	5.66883	42915	2.07e-161	4.82306	4.30372	5.40512	13658	1.22e-74	3.1865	2.81407	3.60824	12723	8.09e-38	1.87287	1.70207	2.06102	2.07e-161
Albumin__g_dl	46191	5.1e-112	0.471429	0.441528	0.503353	14407	7.34e-25	0.260169	0.201342	0.336182	18425	9.26e-70	0.371798	0.33312	0.414968	6971	2.37e-41	0.423009	0.373232	0.479422	6388	3.8e-09	0.722852	0.648879	0.805255	5.1e-112
GENDER	122250	2.39e-100	1.76499	1.67493	1.85986	52954	5.12e-11	2.33929	1.81519	3.01467	42915	1.17e-47	2.23522	2.00498	2.4919	13658	1.59e-15	1.5118	1.36572	1.67353	12723	6.98e-25	1.51246	1.39798	1.6363	2.39e-100
Hemoglobin_.HGB.__g_dl	50984	2.9e-89	0.501949	0.469204	0.53696	17319	4.71e-18	0.253513	0.185827	0.345844	18927	9.44e-59	0.368923	0.326902	0.416349	7376	1.35e-30	0.46971	0.412951	0.53428	7362	1e-08	0.740498	0.668186	0.820644	2.9e-89
ePVS	122250	4.71e-84	1.48652	1.42824	1.54719	52954	8.8e-18	2.11827	1.7848	2.51405	42915	1.03e-60	1.87371	1.73854	2.01939	13658	3.28e-31	1.67577	1.536	1.82824	12723	1.13e-08	1.24645	1.15568	1.34436	4.71e-84
Red_cell_distribution_width.CV_.RDW.CV.__.	50295	4.86e-82	1.83758	1.72684	1.95544	16989	1.2e-09	2.42195	1.82108	3.22109	18714	3.77e-55	2.44824	2.18842	2.7389	7303	1.9e-23	1.82968	1.62494	2.06022	7289	1.26e-11	1.39759	1.26856	1.53975	4.86e-82
Acidosis	122250	2.56e-81	1.34401	1.30384	1.38542	52954	5.65e-25	1.64532	1.49687	1.80849	42915	5.23e-50	1.59606	1.50066	1.69753	13658	1.51e-27	1.53618	1.42179	1.65973	12723	6.62e-08	1.21386	1.13144	1.30231	2.56e-81
AcidBaseBalance	122250	3.42e-77	1.4518	1.39587	1.50999	52954	6.28e-22	2.00299	1.73877	2.30734	42915	1.98e-46	1.81324	1.67129	1.96724	13658	3.12e-25	1.63493	1.48998	1.79401	12723	8.98e-09	1.26061	1.16486	1.3642	3.42e-77
Fluid, pH and electrolyte disorders (FPEI)	122250	3.97e-76	1.51115	1.44637	1.57884	52954	5.74e-20	2.11823	1.8036	2.48774	42915	1.53e-51	1.95771	1.7943	2.13604	13658	5.39e-25	1.67706	1.5203	1.84995	12723	2.14e-07	1.2442	1.14557	1.35125	3.97e-76
Hematocrit_.HCT.__.	50883	2.57e-75	0.54135	0.50705	0.578004	17237	1.86e-18	0.263289	0.195371	0.354826	18917	2.19e-52	0.398213	0.35371	0.448286	7371	6.91e-28	0.490007	0.431244	0.556787	7358	5.11e-06	0.788049	0.711351	0.872963	2.57e-75
Blood_urea_nitrogen_.BUN.__mg_dl	53846	2.58e-67	1.89946	1.76655	2.0424	16891	3.04e-18	3.56984	2.68092	4.75348	21231	9.56e-39	2.2086	1.96024	2.48844	8072	6.88e-15	1.64911	1.45399	1.87037	7652	3.19e-11	1.4165	1.27809	1.56988	2.58e-67
Red_blood_cell_count_.RBC.__x10.6_ul	50543	4.07e-60	0.56747	0.530222	0.607337	17103	4.98e-18	0.274697	0.205001	0.368084	18791	1.43e-41	0.428945	0.379363	0.485005	7332	1.37e-22	0.523937	0.460275	0.596399	7317	0.000179	0.821896	0.741737	0.910713	4.07e-60
Leukocyte_lymphocyte_ratio	122250	1.78e-59	0.678069	0.647053	0.71057	52954	1.49e-13	0.429589	0.343322	0.537531	42915	9.26e-47	0.491325	0.445907	0.541371	13658	2.73e-18	0.642372	0.58156	0.709546	12723	1.9e-06	0.822261	0.758651	0.891208	1.78e-59
Congestive heart failure	122250	1.97e-58	1.33569	1.28948	1.38354	52954	3.78e-15	1.48939	1.34858	1.64491	42915	9.15e-43	1.64351	1.53081	1.76453	13658	1.38e-23	1.58005	1.44466	1.72816	12723	5.71e-08	1.24433	1.14985	1.34652	1.97e-58
Calcium.total__mg_dl	53348	8.85e-58	0.587942	0.550959	0.627407	16648	2.64e-12	0.336467	0.247972	0.456542	21053	1.86e-38	0.434298	0.382864	0.49264	8018	4.42e-21	0.536493	0.471309	0.610691	7629	2.73e-07	0.759252	0.683581	0.843305	8.85e-58
VolumeUp	122250	8.85e-57	1.30504	1.26284	1.34863	52954	1.5e-27	1.70973	1.55222	1.88324	42915	7.21e-48	1.63203	1.52773	1.74347	13658	1.03e-21	1.50499	1.38417	1.63635	12723	0.00552	1.11609	1.03277	1.20611	8.85e-57
VolumeDown	122250	3.72e-50	1.30368	1.25894	1.34998	52954	2.69e-09	1.54674	1.33974	1.78575	42915	1.39e-27	1.48241	1.38095	1.59131	13658	1.9e-21	1.51504	1.3907	1.65045	12723	9.86e-09	1.2499	1.15809	1.34894	3.72e-50
Renal disease	122250	1.27e-48	1.30753	1.26145	1.35526	52954	9.04e-20	1.57997	1.43173	1.74356	42915	2.85e-45	1.68219	1.56504	1.80812	13658	1.48e-15	1.45309	1.32565	1.59281	12723	2.61e-05	1.18586	1.09524	1.28388	1.27e-48
Neutrophil_lymphocyte_ratio	122250	3.41e-46	1.37105	1.31288	1.43177	52954	1.98e-09	1.91715	1.5499	2.37136	42915	9.6e-41	1.79984	1.65121	1.96185	13658	4.09e-16	1.47425	1.34267	1.6188	12723	0.000144	1.16205	1.07544	1.25557	3.41e-46
Glucose.random__mg_dl	54036	6.52e-44	1.56545	1.46956	1.66757	17139	5.18e-11	2.21186	1.74518	2.80333	21136	1.11e-17	1.68672	1.49645	1.90115	8091	6.75e-18	1.6663	1.48364	1.87147	7670	2.03e-05	1.23811	1.12226	1.36591	6.52e-44
Hyperkalemia (E875)	122250	2.29e-43	1.24282	1.20505	1.28175	52954	7.98e-17	1.44906	1.32797	1.58117	42915	2.98e-34	1.47482	1.3856	1.56979	13658	1.59e-14	1.38028	1.2713	1.49861	12723	0.00199	1.12582	1.04434	1.21366	2.29e-43
WithoutComorb	122250	2.29e-43	0.0607558	0.0408249	0.0904185	52954	1.27e-10	0.026418	0.00872808	0.0799617	42915	1.13e-16	0.0718732	0.0385686	0.133935	13658	6.3e-09	0.28054	0.182696	0.430791	12723	4e-09	0.391473	0.286443	0.535021	2.29e-43
Lymphocyte.percent__.	45361	2.45e-43	0.557976	0.513586	0.606121	15080	7.37e-11	0.255986	0.169873	0.385741	16826	7.25e-37	0.343625	0.291327	0.405265	6692	6.47e-13	0.56943	0.488364	0.663912	6763	0.00287	0.840351	0.74954	0.94215	2.45e-43
RESP__breaths_min	51169	5e-43	2.20993	1.97376	2.47437	20162	0.000942	2.8344	1.52867	5.25542	18245	1.12e-24	2.76564	2.27699	3.35915	6569	3.65e-21	2.79522	2.25814	3.46006	6193	1.32e-05	1.32747	1.16867	1.50787	5e-43
Hypo-osmolality and hyponatremia	122250	5.65e-43	1.25659	1.21632	1.29822	52954	4.79e-19	1.55958	1.41444	1.71962	42915	8.25e-43	1.57052	1.47241	1.67517	13658	2.22e-17	1.4341	1.31946	1.55873	12723	0.0612	1.07765	0.996504	1.16543	5.65e-43
Diabetes with complications	122250	1.21e-38	1.27008	1.22512	1.31671	52954	3.86e-13	1.4806	1.33176	1.64607	42915	2.04e-29	1.55817	1.44241	1.68321	13658	8.09e-11	1.35864	1.2387	1.49024	12723	0.0117	1.10511	1.02251	1.19437	1.21e-38
Other neurological disorders	122250	5.3e-38	1.31014	1.25741	1.36506	52954	3.5e-09	1.60953	1.37438	1.88493	42915	7.64e-29	1.57707	1.45564	1.70863	13658	8.36e-15	1.45748	1.3252	1.60296	12723	7.26e-06	1.21089	1.11373	1.31649	5.3e-38
Fluid overload	122250	3.33e-35	1.1908	1.15833	1.22418	52954	2.27e-25	1.38739	1.30443	1.47563	42915	7.22e-24	1.32247	1.25247	1.39638	13658	4.41e-09	1.25435	1.1629	1.35298	12723	0.00306	1.11138	1.03637	1.1918	3.33e-35
Mean_corpuscular_hemoglobin_concentration_.MCHC.__g_dl	49606	4.95e-35	0.638506	0.594613	0.685628	16846	0.00504	0.609607	0.431345	0.861522	18405	8.81e-20	0.536571	0.469255	0.613535	7206	1.61e-08	0.677406	0.591772	0.775425	7149	1.54e-09	0.725561	0.653831	0.805163	4.95e-35
Hypokalemia (E876)	122250	5.83e-34	1.26255	1.21595	1.31094	52954	8.67e-12	1.62907	1.41611	1.87408	42915	5.09e-24	1.49914	1.38594	1.62156	13658	1.88e-11	1.36328	1.24536	1.49232	12723	0.000973	1.14116	1.05506	1.2343	5.83e-34
Hyperosmolality and hypernatremia	122250	1.04e-33	1.17903	1.148	1.2109	52954	3.82e-11	1.26574	1.18033	1.35734	42915	5.7e-17	1.26652	1.19836	1.33856	13658	1.05e-12	1.30548	1.21316	1.40482	12723	5.57e-07	1.19123	1.11235	1.27572	1.04e-33
Neutrophil.percent__.	45373	1.3e-33	1.59784	1.47953	1.72342	15078	5.82e-08	2.99264	2.01387	4.44684	16829	7.04e-31	2.43889	2.09587	2.83518	6697	2.14e-10	1.60318	1.38728	1.85617	6769	0.00833	1.16022	1.03778	1.29481	1.3e-33
Lymphocyte.absolute__x10.3_ul	44870	5.79e-25	0.701567	0.655885	0.750423	14909	8.54e-09	0.457346	0.350419	0.596908	16654	9.27e-33	0.494018	0.439931	0.554752	6630	1.45e-06	0.72359	0.634358	0.825374	6677	0.317	0.946487	0.849861	1.05413	9.27e-33
Dehydration	122250	2.64e-32	1.22917	1.18788	1.27189	52954	8.28e-05	1.36747	1.17012	1.59808	42915	4.58e-17	1.35356	1.2612	1.45268	13658	1.45e-15	1.41011	1.29597	1.53429	12723	1.31e-06	1.20431	1.11697	1.29848	2.64e-32
Cholesterol.HDL__mg_dl	31677	2.8e-32	0.600332	0.551659	0.653303	8951	0.000402	0.406406	0.246814	0.669193	14383	4.84e-24	0.407555	0.342483	0.484997	4860	2.07e-10	0.628566	0.544715	0.725326	3483	0.00907	0.800515	0.677314	0.946121	2.8e-32
Midwest_East_North_Central	122250	4.38e-32	1.36289	1.29456	1.43488	52954	0.356	1.12561	0.875653	1.44689	42915	8.09e-05	1.22935	1.10935	1.36226	13658	2.71e-08	1.3328	1.20445	1.47482	12723	2.22e-24	1.50686	1.39255	1.63051	4.38e-32
Creatinine__mg_dl	53226	1.12e-31	1.50746	1.40738	1.61467	16838	0.000313	2.06637	1.39249	3.06636	20911	2.5e-18	1.79518	1.57425	2.04711	7884	1.44e-07	1.4405	1.25732	1.65036	7593	1.88e-09	1.38209	1.24361	1.53596	1.12e-31
Deficiency anemias	122250	1.29e-29	1.29654	1.23943	1.35628	52954	5.96e-14	2.09158	1.72515	2.53585	42915	1.48e-30	1.68313	1.54008	1.83943	13658	1.77e-12	1.42277	1.28992	1.56926	12723	0.226	1.05187	0.969223	1.14153	1.48e-30
COPD	122250	2.4e-30	1.22679	1.18459	1.2705	52954	1.06e-06	1.29577	1.16771	1.43789	42915	7.71e-19	1.42139	1.31504	1.53629	13658	1.51e-15	1.44758	1.32183	1.58536	12723	0.0126	1.10412	1.02149	1.19343	2.4e-30
Coagulopathy	122250	3.63e-30	1.21673	1.17643	1.25842	52954	9.66e-10	1.48647	1.30911	1.68787	42915	2.51e-23	1.41719	1.32312	1.51793	13658	1.62e-07	1.26144	1.15647	1.37596	12723	5.08e-06	1.18652	1.10246	1.27698	3.63e-30
Neutrophil.absolute__x10.3_ul	45203	7.74e-29	1.53448	1.42313	1.65451	15009	7.33e-05	2.26288	1.51132	3.38818	16766	1.23e-13	1.75428	1.51208	2.0353	6681	1.96e-12	1.66703	1.44582	1.92201	6747	6.59e-05	1.25362	1.12186	1.40082	7.74e-29
Moderate or severe liver disease	122250	7.77e-27	1.17491	1.1408	1.21003	52954	3.25e-14	1.25034	1.18022	1.32462	42915	1.82e-12	1.22734	1.15937	1.29929	13658	7.29e-05	1.16533	1.08047	1.25683	12723	0.00196	1.10383	1.03691	1.17508	7.77e-27
White_blood_cell_count_.WBC.__x10.3_ul	50568	8.81e-27	1.47611	1.37461	1.58512	17112	0.00218	1.81305	1.23919	2.65261	18813	1.83e-06	1.41394	1.22639	1.63018	7331	8.4e-13	1.64293	1.43397	1.8823	7312	5.51e-08	1.34251	1.20719	1.493	8.81e-27
Alkaline_phosphatase.total_.ALP.__u_l	45297	2.67e-26	1.50539	1.39585	1.62356	14186	4.23e-09	3.10494	2.12762	4.53116	18086	8.84e-21	2.00758	1.73466	2.32343	6806	4.57e-10	1.57479	1.36523	1.81651	6219	0.0642	1.11201	0.993753	1.24433	2.67e-26
Diabetes without complications	122250	3.05e-26	1.26335	1.20991	1.31919	52954	2.02e-12	1.73106	1.48559	2.01708	42915	2.33e-16	1.47476	1.34406	1.6182	13658	2.46e-07	1.29842	1.17581	1.43375	12723	0.0724	1.07597	0.993361	1.16544	3.05e-26
Low total CO2	122250	9.87e-26	1.23661	1.18847	1.28668	52954	0.000106	1.4247	1.19123	1.70393	42915	3.14e-10	1.27859	1.18437	1.38034	13658	2.34e-08	1.26708	1.16605	1.37685	12723	6.57e-08	1.20813	1.12802	1.29391	9.87e-26
INSURANCE_Medicare	122250	4.14e-10	1.16305	1.10919	1.21947	52954	7.8e-14	1.48124	1.33622	1.64199	42915	2.47e-25	1.57143	1.44313	1.71116	13658	0.842	0.989586	0.893011	1.09656	12723	0.327	0.959845	0.88434	1.04176	2.47e-25
Myocardial infarction	122250	2.49e-25	1.18867	1.15059	1.22801	52954	1.9e-05	1.23871	1.12294	1.36642	42915	7.75e-20	1.38288	1.2898	1.48271	13658	2.25e-09	1.30598	1.19652	1.42545	12723	0.000403	1.146	1.06267	1.23585	2.49e-25
Hypotension	122250	8.47e-24	1.18204	1.14412	1.2212	52954	3.93e-09	1.40211	1.25289	1.56909	42915	3.92e-18	1.35412	1.26454	1.45004	13658	2.8e-12	1.3538	1.24354	1.47386	12723	0.00984	1.10604	1.02452	1.19396	8.47e-24
Weight loss	122250	1.88e-22	1.19043	1.14943	1.23291	52954	1.43e-05	1.38237	1.19432	1.60006	42915	1.45e-21	1.41047	1.31423	1.51374	13658	6.23e-06	1.2285	1.12356	1.34321	12723	0.000268	1.15525	1.06898	1.24846	1.88e-22
INSURANCE_Commercial	122250	1.03e-20	0.709408	0.660062	0.762438	52954	3.11e-05	0.551451	0.416735	0.729712	42915	1.91e-22	0.546168	0.483618	0.616812	13658	0.519	0.967029	0.873352	1.07073	12723	0.547	0.975555	0.900056	1.0574	1.91e-22
Mixed disorder of acid-base balance	122250	3.88e-22	1.13092	1.10308	1.15946	52954	1.91e-12	1.19597	1.13785	1.25705	42915	1.4e-10	1.16745	1.11352	1.22399	13658	3.02e-05	1.15938	1.08156	1.24279	12723	0.00163	1.1068	1.03907	1.17894	3.88e-22
Dementia	122250	8.84e-22	1.1688	1.13212	1.20665	52954	0.0168	1.11366	1.01959	1.21642	42915	2.8e-19	1.29471	1.22371	1.36982	13658	1.32e-20	1.49387	1.37278	1.62566	12723	9.11e-06	1.20501	1.10973	1.30844	8.84e-22
Arrhythmia	122250	3.62e-21	1.25736	1.199	1.31856	52954	7.13e-09	1.7244	1.43385	2.07381	42915	2.02e-17	1.49379	1.36164	1.63873	13658	0.00014	1.21795	1.10043	1.34799	12723	0.00168	1.14451	1.05204	1.24506	3.62e-21
Alkalosis	122250	2.94e-20	1.13537	1.10514	1.16642	52954	1.11e-11	1.24123	1.16619	1.32111	42915	5.18e-16	1.22813	1.1686	1.29068	13658	0.00711	1.1151	1.03006	1.20717	12723	0.00248	1.10632	1.03623	1.18117	2.94e-20
South_South_Atl_West_South_Crl	122250	1.3e-18	0.727955	0.678285	0.781263	52954	0.227	0.822572	0.599078	1.12947	42915	0.00156	0.818066	0.722381	0.926425	13658	5.96e-06	0.739055	0.64838	0.842415	12723	2.16e-12	0.655011	0.582071	0.737092	1.3e-18
INSURANCE_Uninsured	122250	2.69e-17	1.20827	1.15644	1.26241	52954	0.00229	1.30686	1.10037	1.5521	42915	4.46e-05	1.17304	1.08651	1.26645	13658	6.04e-06	1.16443	1.09012	1.2438	12723	4.62e-08	1.15436	1.09644	1.21534	2.69e-17
Psychoses	122250	6.51e-17	1.18753	1.14058	1.23641	52954	0.000541	1.3699	1.14615	1.63731	42915	6.16e-07	1.23897	1.13889	1.34784	13658	2.4e-11	1.35002	1.23619	1.47429	12723	0.0812	1.07436	0.991145	1.16455	6.51e-17
Globulin__g_dl	20619	2.16e-13	1.52309	1.3612	1.70424	6081	1.85e-05	3.24995	1.89505	5.5736	8868	1.22e-16	2.65105	2.10475	3.33913	3102	0.00145	1.45777	1.15599	1.83836	2568	0.191	1.12411	0.943209	1.33971	1.22e-16
DBP__mm_Hg	66712	1.43e-16	0.710624	0.655307	0.770562	26870	0.151	1.31598	0.904364	1.91377	24392	8.42e-11	0.602797	0.517356	0.702318	8196	1.15e-08	0.659288	0.571366	0.760696	7254	0.000298	0.816551	0.731654	0.911405	1.43e-16
Cerebrovascular disease	122250	1.99e-13	1.14859	1.10695	1.19179	52954	1.19e-06	1.3331	1.18709	1.49708	42915	1.19e-15	1.37298	1.27045	1.48377	13658	0.00025	1.19663	1.08702	1.31734	12723	0.087	1.0722	0.989914	1.1613	1.19e-15
Periphral vascular disease	122250	1.24e-15	1.16679	1.12351	1.21173	52954	0.00451	1.19428	1.05654	1.34997	42915	1.82e-15	1.37875	1.27381	1.49235	13658	1.08e-06	1.27184	1.15471	1.40084	12723	0.0986	1.07086	0.987312	1.16148	1.24e-15
Paraplegia and hemiplegia	122250	4.08e-11	1.11184	1.07739	1.14739	52954	0.000482	1.20144	1.0838	1.33184	42915	1.44e-15	1.27812	1.20338	1.35751	13658	0.0886	1.08108	0.988304	1.18257	12723	0.333	1.03746	0.963017	1.11766	1.44e-15
Cholesterol.total__mg_dl	31818	1.05e-14	0.641552	0.573258	0.717931	8999	0.448	0.814619	0.479731	1.38696	14444	2.48e-15	0.413238	0.332074	0.514402	4880	0.00216	0.717644	0.580412	0.887063	3495	0.0757	0.855703	0.720708	1.01664	2.48e-15
Valvular disease	122250	3.23e-15	1.16458	1.12127	1.20956	52954	2.33e-09	1.46575	1.29292	1.6617	42915	1.21e-11	1.3242	1.22093	1.43621	13658	0.00224	1.16396	1.05602	1.28295	12723	0.000372	1.156	1.06734	1.25207	3.23e-15
Pneumococcal 13 vaccine	122250	9.39e-09	0.886153	0.850334	0.923483	52954	0.0168	1.28738	1.04666	1.58345	42915	0.118	0.929836	0.848708	1.01872	13658	3.87e-15	0.633034	0.564811	0.709499	12723	0.0116	0.897752	0.825607	0.976199	3.87e-15
Hemoglobin_A1C__.	27169	4.28e-15	1.48494	1.34529	1.63908	7336	0.000331	2.10925	1.40329	3.17043	12071	7.76e-09	1.66538	1.4006	1.9802	4499	1.14e-05	1.44553	1.22623	1.70408	3263	0.0767	1.14901	0.985209	1.34006	4.28e-15
Carbon_dioxide.total_.CO2.__mmol_l	51259	5.43e-15	0.76313	0.713099	0.816672	15914	0.000183	0.499302	0.346999	0.718432	20286	0.00296	0.811297	0.706757	0.931261	7699	3.24e-07	0.701738	0.612581	0.803889	7360	5.79e-06	0.781864	0.702971	0.869635	5.43e-15
Boostrix DTP vaccine	122250	8.91e-15	0.783547	0.736696	0.833382	52954	0.000342	0.574323	0.42397	0.778008	42915	5.71e-12	0.657988	0.584092	0.741235	13658	5.87e-07	0.752076	0.672527	0.841032	12723	0.62	0.980248	0.905958	1.06064	8.91e-15
Obesity	122250	2.61e-14	1.22133	1.16006	1.28586	52954	2.93e-05	1.63509	1.2983	2.05921	42915	0.000142	1.22155	1.10192	1.35421	13658	9.02e-05	1.22285	1.10566	1.3524	12723	0.05	1.08274	0.999992	1.17235	2.61e-14
African	122250	3.27e-14	1.22428	1.16196	1.29001	52954	3.94e-05	1.5841	1.2721	1.97257	42915	1.17e-05	1.24279	1.1277	1.3697	13658	0.00202	1.16614	1.05774	1.28569	12723	0.00605	1.11383	1.0313	1.20296	3.27e-14
Chronic pulmonary disease	122250	4.3e-14	1.20108	1.1453	1.25958	52954	0.0129	1.32933	1.06206	1.66379	42915	4.03e-09	1.34041	1.21578	1.47783	13658	1.19e-05	1.24973	1.13104	1.38081	12723	0.0957	1.07094	0.987982	1.16087	4.3e-14
PULSE__bpm	64073	4.65e-14	1.36495	1.25892	1.47989	25702	1.93e-08	3.22508	2.14343	4.85256	23426	1.19e-07	1.49181	1.28649	1.72989	7905	0.000386	1.29553	1.12293	1.49466	7040	0.00681	1.16437	1.04285	1.30005	4.65e-14
Flucelvax Quad vaccine	122250	1.19e-13	0.815726	0.772984	0.86083	52954	0.468	0.907484	0.698148	1.17958	42915	3.09e-10	0.703407	0.63042	0.784851	13658	6.45e-07	0.764258	0.687479	0.849606	12723	0.0165	0.903426	0.831482	0.981597	1.19e-13
Erythrocyte_sedimentation_rate_.ESR.__mm_hr	6360	1.2e-13	2.4245	1.91846	3.06361	1883	0.000496	7.67177	2.43741	24.1484	2632	1.7e-06	2.91949	1.88264	4.52767	1044	9.3e-05	2.37232	1.53824	3.65868	801	NA	NA	NA	NA	1.2e-13
Metastatic carcinoma	122250	5.02e-11	1.11403	1.0787	1.1505	52954	0.0002	1.22606	1.10119	1.36509	42915	1.38e-13	1.27618	1.19634	1.36135	13658	8.68e-06	1.20505	1.10995	1.30828	12723	0.9	1.00507	0.929057	1.08731	1.38e-13
Hypochloremia	122250	4.01e-06	1.08975	1.05066	1.13029	52954	0.00225	1.19408	1.06563	1.33801	42915	2.79e-13	1.27729	1.19611	1.36399	13658	0.829	1.01121	0.914038	1.11873	12723	0.412	0.965394	0.887434	1.05021	2.79e-13
Cholesterol.LDL__mg_dl	31695	3.29e-11	0.678914	0.605456	0.76149	8872	0.295	0.741736	0.424347	1.29475	14403	5.35e-13	0.445127	0.357308	0.554486	4905	0.00829	0.757314	0.616007	0.931033	3515	0.311	0.91724	0.776213	1.08284	5.35e-13
Protein.total__g_dl	45641	5.45e-13	0.767623	0.714394	0.824809	14320	2.02e-07	0.422725	0.305518	0.584901	18211	1.89e-06	0.716445	0.624611	0.821789	6837	2.19e-07	0.689033	0.598488	0.793273	6273	0.0553	0.895516	0.79993	1.00255	5.45e-13
Sodium_.Na.__mmol_l	53717	2.45e-05	0.873986	0.820994	0.930426	16831	4.12e-05	0.51497	0.37499	0.707209	21181	6.56e-13	0.626324	0.551315	0.71154	8065	0.0543	0.87934	0.771428	1.00226	7640	0.0963	1.09262	0.984287	1.21299	6.56e-13
Peripheral vascular disorders	122250	7.94e-13	1.12368	1.0884	1.16012	52954	0.00793	1.17658	1.04348	1.32665	42915	2.12e-08	1.21413	1.13444	1.29943	13658	6.84e-06	1.20696	1.11197	1.31003	12723	0.0185	1.09211	1.01489	1.17524	7.94e-13
Hypovolemia	122250	1.4e-12	1.11037	1.07867	1.14301	52954	0.0207	1.12966	1.01882	1.25257	42915	5.01e-12	1.2235	1.15542	1.29559	13658	7.73e-05	1.17096	1.08283	1.26629	12723	0.0773	1.06684	0.992942	1.14622	1.4e-12
Low natrium	122250	1.21e-08	1.11803	1.07594	1.16177	52954	7.36e-05	1.33669	1.15803	1.5429	42915	1.61e-12	1.28536	1.19888	1.37807	13658	0.074	1.08606	0.992008	1.18904	12723	0.929	0.996374	0.920346	1.07868	1.61e-12
Herpes Zoster vaccine, various	122250	1.66e-12	0.856058	0.819906	0.893803	52954	0.989	0.62815	0	NA	42915	2.64e-09	0.681744	0.600949	0.773395	13658	1.96e-09	0.688438	0.609413	0.777711	12723	0.0176	0.901805	0.828059	0.982116	1.66e-12
Iron_binding_capacity.total_.TIBC.__ug_dl	7064	2.72e-12	0.52681	0.440381	0.630152	2096	4.67e-08	0.111399	0.0506672	0.244653	2536	4.34e-10	0.346853	0.248835	0.48368	1231	0.00167	0.595626	0.430824	0.822251	1201	0.575	0.930535	0.72363	1.18822	2.72e-12
C.reactive_protein_.CRP.__mg_l	6659	4.26e-12	1.9502	1.61428	2.35609	2025	0.000999	4.43327	1.82622	10.7631	2618	7.03e-07	2.46562	1.72603	3.52199	1071	0.00191	1.77909	1.23638	2.55966	945	NA	NA	NA	NA	4.26e-12
Glomerular_filtration_rate1.73_sq_M.predicted.black__NA	2239	5.9e-12	0.226802	0.14859	0.346081	519	NA	NA	NA	NA	993	NA	NA	NA	NA	371	NA	NA	NA	NA	356	NA	NA	NA	NA	5.9e-12
Other fluid overload	122250	9.04e-12	1.09487	1.06672	1.12376	52954	2.57e-06	1.13576	1.07707	1.19764	42915	2.59e-05	1.1208	1.06281	1.18196	13658	0.000288	1.13236	1.05878	1.21107	12723	0.0299	1.07434	1.007	1.14618	9.04e-12
Hypertension, combined	122250	1.33e-09	1.2113	1.1385	1.2887	52954	2.5e-11	1.96503	1.61142	2.39624	42915	5.78e-06	1.29697	1.15909	1.45128	13658	0.0317	1.12856	1.01063	1.26017	12723	0.549	0.974022	0.893686	1.06159	2.5e-11
Other volume depletion	122250	2.72e-07	1.07813	1.04766	1.1095	52954	4.56e-08	1.23008	1.14208	1.32486	42915	7.01e-11	1.18202	1.12407	1.24295	13658	0.0662	1.08192	0.994756	1.17673	12723	0.454	1.0292	0.954538	1.10969	7.01e-11
Lymphoma	122250	1.62e-07	1.0837	1.05159	1.11679	52954	4.99e-06	1.19967	1.10948	1.2972	42915	2.51e-10	1.20221	1.13554	1.2728	13658	0.00269	1.133	1.04428	1.22926	12723	0.672	1.01708	0.940374	1.10005	2.51e-10
Oxygen_saturation_.SpO2..pulse_oximetry__.	64154	7.99e-10	0.817912	0.767109	0.872052	24840	2.86e-10	0.433507	0.334334	0.562102	23469	0.0214	0.857246	0.751852	0.9774	8324	0.00018	0.783465	0.689557	0.890181	7521	0.0236	0.885897	0.797683	0.983847	2.86e-10
AST_ALT	122250	8.26e-09	1.14853	1.09567	1.20392	52954	0.255	1.1487	0.904776	1.45838	42915	2.92e-10	1.37091	1.2428	1.51221	13658	0.00285	1.16128	1.05262	1.28117	12723	0.0848	1.07321	0.990342	1.16298	2.92e-10
High chloride	122250	6.38e-10	1.12528	1.08394	1.16822	52954	0.406	1.09386	0.885281	1.35159	42915	0.000109	1.17386	1.0823	1.27315	13658	2.28e-05	1.20535	1.10555	1.31416	12723	0.000559	1.13871	1.05771	1.22592	6.38e-10
Ferritin__ng_ml	7593	1.21e-08	1.65568	1.39194	1.96901	2329	1.85e-09	7.08084	3.7401	13.4057	2804	1.97e-05	2.04298	1.47167	2.8359	1252	0.139	1.25395	0.929453	1.69185	1208	0.238	1.16223	0.905526	1.49172	1.85e-09
Depression	122250	1.87e-09	1.15795	1.10384	1.21467	52954	0.0442	1.26933	1.00621	1.60128	42915	0.00186	1.17351	1.06104	1.29795	13658	7.45e-09	1.33832	1.21241	1.47732	12723	0.502	1.02904	0.946583	1.11869	1.87e-09
High matirum	122250	3.17e-09	1.08409	1.05551	1.11344	52954	0.989	0.470458	0	NA	42915	2.97e-05	1.12405	1.06401	1.18747	13658	0.0938	1.07112	0.988421	1.16074	12723	1.01e-05	1.13658	1.07378	1.20305	3.17e-09
Glomerular_filtration_rate1.73_sq_M.predicted__NA	6694	3.83e-09	0.384772	0.279992	0.52863	2234	0.000601	0.207306	0.0843984	0.509188	2955	7.75e-06	0.399912	0.267609	0.597521	912	NA	NA	NA	NA	593	NA	NA	NA	NA	3.83e-09
Monocyte.absolute__x10.3_ul	44748	3.94e-09	1.2547	1.16342	1.35318	14815	0.0427	1.52082	1.01383	2.28139	16600	0.000158	1.3403	1.15133	1.56029	6642	5.39e-05	1.35052	1.16726	1.56258	6691	0.0759	1.10508	0.989623	1.23397	3.94e-09
Triglycerides_.TG.__mg_dl	31566	4.78e-09	1.37835	1.238	1.53466	8853	0.000176	3.10269	1.7171	5.60645	14334	4.95e-06	1.58389	1.30016	1.92945	4888	0.00157	1.35157	1.12132	1.62916	3491	0.361	1.07728	0.91823	1.26389	4.78e-09
ELR	122250	1.16e-08	0.881967	0.844724	0.920849	52954	0.0346	0.795166	0.642854	0.98357	42915	5.81e-09	0.778863	0.716014	0.847232	13658	0.546	0.97075	0.881657	1.06884	12723	0.00146	0.885277	0.821279	0.954259	5.81e-09
Mild liver disease	122250	6.24e-09	1.13933	1.09031	1.19059	52954	1.22e-06	1.45434	1.25014	1.69192	42915	0.00345	1.1457	1.04589	1.25508	13658	0.00042	1.181	1.07669	1.29538	12723	0.762	1.01235	0.935009	1.09609	6.24e-09
Hypertension	122250	8.78e-07	1.17023	1.09916	1.24592	52954	1.13e-08	1.80473	1.47365	2.2102	42915	0.000446	1.22294	1.093	1.3683	13658	0.209	1.07323	0.961275	1.19824	12723	0.658	0.980516	0.898695	1.06976	1.13e-08
Mean_corpuscular_hemoglobin_.MCH.__pg	49410	1.57e-08	0.813755	0.757646	0.874011	16737	0.677	0.924507	0.639001	1.3375	18348	7.78e-06	0.731095	0.637314	0.838684	7195	0.00157	0.802273	0.699833	0.919691	7130	0.0118	0.874242	0.787388	0.970677	1.57e-08
PACK_YEARS__NA	9554	2.81e-08	1.84771	1.48765	2.29497	2117	0.0694	0.304237	0.0842201	1.09906	4375	0.000111	2.16264	1.46277	3.19756	1841	0.00851	1.58115	1.12389	2.22423	1221	0.00815	1.52846	1.11631	2.09278	2.81e-08
Pneumovax 23 vaccine	122250	0.00482	0.94006	0.900513	0.981339	52954	0.027	1.20321	1.0212	1.41762	42915	0.904	0.994083	0.902994	1.09438	13658	3.78e-08	0.737238	0.661356	0.821823	12723	0.0777	0.928682	0.855402	1.00827	3.78e-08
Hypothyroidism	122250	0.124	1.03495	0.990655	1.08121	52954	7.17e-08	1.58998	1.34314	1.88222	42915	0.0103	1.14107	1.03168	1.26208	13658	0.417	1.04404	0.940823	1.15858	12723	0.23	0.94957	0.872679	1.03323	7.17e-08
HT__cm	61694	0.000689	0.831922	0.748042	0.925227	24297	0.00253	0.475231	0.293215	0.770254	23083	2.65e-07	0.591364	0.484179	0.722278	7754	0.264	0.890657	0.726985	1.09212	6560	0.49	1.05798	0.901706	1.24115	2.65e-07
Bilirubin.direct__mg_dl	10110	3.58e-07	1.38127	1.21974	1.56418	2955	0.454	1.2477	0.698889	2.22744	3788	0.0287	1.30637	1.02831	1.65968	1734	0.000718	1.49581	1.18455	1.88886	1633	0.00223	1.36639	1.11861	1.66901	3.58e-07
AlbuminGlobulin__calc	1709	3.96e-07	0.277963	0.169466	0.455919	483	NA	NA	NA	NA	796	NA	NA	NA	NA	256	NA	NA	NA	NA	174	NA	NA	NA	NA	3.96e-07
Erythrocyte_distribution_width__fl	4902	4.06e-07	1.69285	1.38094	2.07522	1596	0.327	1.68648	0.592568	4.79982	1847	0.000255	1.94478	1.36163	2.77766	789	NA	NA	NA	NA	670	NA	NA	NA	NA	4.06e-07
Troponin.I_.TNI.__ng_ml	8159	4.2e-07	1.34159	1.19722	1.5033	1472	0.0141	2.07146	1.15836	3.70443	2975	8.03e-07	1.7563	1.40424	2.19651	1615	0.00574	1.3844	1.09907	1.74382	2097	0.146	1.13587	0.956426	1.34906	4.2e-07
Iron__ug_dl	7829	4.54e-07	0.681397	0.587048	0.790904	2344	0.193	0.654749	0.346025	1.2389	2841	2.35e-05	0.547685	0.41432	0.723981	1330	2.5e-05	0.553765	0.420696	0.728922	1314	0.624	0.942278	0.743077	1.19485	4.54e-07
Natriuretic_peptide.B_.BNP.__pg_ml	4425	6.36e-07	1.61792	1.33889	1.95514	540	NA	NA	NA	NA	1564	0.00104	1.80137	1.26714	2.56088	1013	0.0123	1.48538	1.08953	2.02498	1308	0.169	1.17512	0.93376	1.47885	6.36e-07
Northeast_Middle_Atlantic	122250	1.22e-06	0.86827	0.820118	0.919246	52954	0.216	1.17703	0.90917	1.52385	42915	0.539	0.965628	0.863679	1.07962	13658	9.43e-05	0.801977	0.717887	0.895918	12723	1.89e-06	0.808272	0.740509	0.882236	1.22e-06
Midwest_West_North_Central	122250	2.02e-06	0.863953	0.813384	0.917666	52954	0.146	1.19421	0.940163	1.51688	42915	0.183	0.92558	0.826	1.03715	13658	0.101	0.91229	0.817509	1.01808	12723	1.24e-06	0.790592	0.718952	0.869365	1.24e-06
Natriuretic_peptide.proBNP_.NT.proBNP.__pg_ml	2897	2.16e-06	1.76219	1.39392	2.22795	344	NA	NA	NA	NA	983	NA	NA	NA	NA	670	NA	NA	NA	NA	900	NA	NA	NA	NA	2.16e-06
INSURANCE_Medicaid	122250	2.53e-06	1.16005	1.09049	1.23404	52954	0.0109	1.36182	1.07377	1.72716	42915	5.12e-06	1.22638	1.12338	1.33882	13658	0.0328	1.10026	1.00784	1.20115	12723	0.238	1.04717	0.96999	1.13049	2.53e-06
ALCOHOL__NA	39092	2.98e-06	0.768065	0.684773	0.845107	15900	0.17	0.669158	0.385056	1	14285	0.0576	0.810734	0.660453	1	4704	0.00762	0.760703	0.617764	0.922866	4203	0.000818	0.755225	0.639716	0.885298	2.98e-06
Asian	122250	0.000243	1.10905	1.04941	1.1721	52954	0.779	0.964474	0.748944	1.24203	42915	0.0906	1.08743	0.986837	1.19828	13658	0.517	1.03288	0.936596	1.13907	12723	3.24e-06	1.1693	1.09477	1.24889	3.24e-06
Cancer	122250	0.00935	1.05253	1.01265	1.09397	52954	3.76e-06	1.41023	1.21902	1.63144	42915	0.000346	1.17194	1.07436	1.27835	13658	0.197	1.06613	0.967383	1.17494	12723	0.666	0.982536	0.907034	1.06434	3.76e-06
Glomerular_filtration_rate1.73_sq_M.predicted__ml_min_1.73m2	6048	6.58e-06	0.468639	0.336976	0.6515	2012	0.949	1.04773	0.251252	4.37436	2655	4.39e-05	0.4246	0.281546	0.640487	848	NA	NA	NA	NA	533	NA	NA	NA	NA	6.58e-06
Potassium_.K.__mmol_l	53811	1.65e-05	0.85899	0.801583	0.920508	16838	0.0233	1.53111	1.05961	2.21243	21235	0.0692	0.878518	0.763991	1.01022	8084	0.00225	0.813729	0.712915	0.928796	7654	0.000651	0.834852	0.75256	0.926139	1.65e-05
Chloride_.Cl.__mmol_l	53593	0.0174	1.08059	1.01362	1.15157	16784	0.323	0.841788	0.598317	1.18406	21120	0.00228	0.81588	0.715908	0.929777	8052	0.00306	1.22807	1.07174	1.40638	7637	1.9e-05	1.25887	1.13322	1.3992	1.9e-05
Influenza vaccine, Merck	122250	1.91e-05	1.16072	1.08406	1.24279	52954	0.149	1.26621	0.918651	1.74525	42915	0.045	1.05134	1.00113	1.10407	13658	0.21	1.03458	0.981013	1.09108	12723	0.000124	1.07952	1.03816	1.12252	1.91e-05
Caucasian	122250	2.24e-05	0.886435	0.838379	0.937241	52954	0.000155	0.604135	0.465288	0.784417	42915	0.000266	0.825534	0.744701	0.915139	13658	0.105	0.919529	0.830859	1.0177	12723	0.904	1.00507	0.92605	1.09081	2.24e-05
Influenza vaccine, Sanofi Pasteur	122250	4.4e-05	1.20364	1.10123	1.31558	52954	0.0159	1.40565	1.0657	1.85405	42915	0.0149	1.06818	1.01294	1.12644	13658	0.39	1.03513	0.956742	1.11995	12723	0.0158	1.06258	1.01145	1.11629	4.4e-05
Osmolality__mOsm_kg	5102	5.32e-05	1.44841	1.2102	1.7335	1402	0.21	1.62557	0.760467	3.4748	2070	0.00511	1.63973	1.15994	2.31799	857	NA	NA	NA	NA	773	NA	NA	NA	NA	5.32e-05
Aspartate_aminotransferase_.AST.__u_l	46162	0.000101	1.16106	1.07688	1.25187	14495	0.0773	1.41389	0.962838	2.07623	18431	0.203	1.09884	0.950297	1.2706	6911	6.86e-05	1.32838	1.15506	1.52772	6325	0.194	1.07757	0.962739	1.20612	6.86e-05
Vitamin_D._25.OH.total_.VIT_D.__ng_ml	13033	7.04e-05	0.730107	0.625206	0.852603	4078	0.0845	0.549492	0.27833	1.08478	5439	0.0402	0.72752	0.536886	0.985836	1918	0.00502	0.675408	0.513456	0.888449	1598	0.108	0.834041	0.668495	1.04058	7.04e-05
Drug abuse	122250	8.19e-05	1.10729	1.05255	1.1649	52954	0.0787	1.17081	0.982072	1.39582	42915	0.107	1.06998	0.985528	1.16166	13658	0.0651	1.0865	0.994818	1.18664	12723	0.908	1.00476	0.926617	1.08951	8.19e-05
Protein.urine.concentration__mg_dl	2032	9.06e-05	1.7334	1.31606	2.28325	644	NA	NA	NA	NA	683	NA	NA	NA	NA	392	NA	NA	NA	NA	313	NA	NA	NA	NA	9.06e-05
Blood loss anemia	122250	9.85e-05	1.08515	1.04144	1.13071	52954	0.107	1.20086	0.961187	1.50029	42915	0.000177	1.155	1.0712	1.24535	13658	0.00029	1.17091	1.07512	1.27522	12723	0.666	1.01742	0.940642	1.10045	9.85e-05
Eosinophil.percent__.	43363	0.000105	0.868156	0.808279	0.932464	14303	0.6	1.11541	0.741913	1.67699	16126	0.000434	0.777701	0.676071	0.894611	6427	0.187	0.912562	0.796576	1.04544	6507	0.0104	0.872423	0.785971	0.968384	0.000105
Estimated_average_glucose__mg_dl	2334	0.000138	1.81519	1.33585	2.46652	622	NA	NA	NA	NA	998	NA	NA	NA	NA	401	NA	NA	NA	NA	313	NA	NA	NA	NA	0.000138
Urobilinogen.urine.dipstick__mg_dl	5531	0.00021	1.45399	1.19277	1.77229	1872	0.963	0.966265	0.22874	4.08181	1956	0.0586	1.46395	0.986249	2.17307	856	NA	NA	NA	NA	847	NA	NA	NA	NA	0.00021
Low potassium	122250	0.0136	1.05872	1.01179	1.10784	52954	0.887	0.983055	0.777261	1.24333	42915	0.000221	1.15328	1.06923	1.24395	13658	0.659	1.02131	0.929919	1.12169	12723	0.909	1.00467	0.92762	1.08814	0.000221
West_Mountain	122250	0.000247	0.876171	0.816368	0.940352	52954	0.414	0.876139	0.638139	1.2029	42915	0.0532	0.876305	0.766517	1.00182	13658	0.0535	0.880699	0.774137	1.00192	12723	0.0154	0.867678	0.773573	0.973228	0.000247
Albumin.urine.concentration__mg_dl	6159	0.000252	1.51449	1.21261	1.89141	1083	0.0316	3.80434	1.12469	12.8675	3191	0.0959	1.43676	0.937833	2.20117	1224	0.0067	1.67985	1.15465	2.44393	661	NA	NA	NA	NA	0.000252
Cholesterol.non.HDL__mg_dl	15193	0.14	0.89373	0.76992	1.03745	4350	0.98	1.01042	0.444195	2.29842	6836	0.000279	0.61401	0.471978	0.79878	2334	0.618	1.07568	0.807769	1.43241	1673	0.349	1.12289	0.880949	1.4313	0.000279
Troponin.T_.TNT.__ng_ml	2068	0.000284	1.47754	1.19674	1.82429	260	NA	NA	NA	NA	767	NA	NA	NA	NA	474	NA	NA	NA	NA	567	NA	NA	NA	NA	0.000284
Pertussis	122250	0.000303	1.05309	1.02395	1.08306	52954	0.992	0.779393	0	NA	42915	0.0342	1.05581	1.00406	1.11022	13658	0.000818	1.07285	1.02956	1.11796	12723	NA	1	NA	NA	0.000303
Asthma	122250	0.399	1.02289	0.970437	1.07821	52954	0.000328	1.42008	1.17274	1.71955	42915	0.192	1.06934	0.966926	1.1826	13658	0.134	0.920648	0.826286	1.0258	12723	0.776	0.988279	0.911146	1.07195	0.000328
Glomerular_filtration_rate1.73_sq_M.predicted.non_black__ml_min_1.73m2	1829	0.00036	0.447608	0.287891	0.696209	234	NA	NA	NA	NA	794	NA	NA	NA	NA	417	NA	NA	NA	NA	384	NA	NA	NA	NA	0.00036
Northeast_New_England	122250	0.00113	1.08506	1.03304	1.1397	52954	0.694	0.946865	0.721286	1.24299	42915	0.845	1.01055	0.909335	1.12302	13658	0.000387	1.18397	1.07854	1.29972	12723	0.00698	1.11699	1.0307	1.21048	0.000387
Thyroxine.free_.FT4.__ng_dl	8760	0.000436	0.734277	0.618175	0.872181	2734	0.0722	0.438586	0.178574	1.07718	3488	0.0422	0.672973	0.459263	0.986135	1356	0.204	0.801736	0.570177	1.12732	1182	0.0237	0.734357	0.561938	0.959676	0.000436
Glomerular_filtration_rate1.73_sq_M.predicted.black__ml_min_1.73m2	1586	0.000481	0.373303	0.214623	0.649268	232	NA	NA	NA	NA	730	NA	NA	NA	NA	340	NA	NA	NA	NA	284	NA	NA	NA	NA	0.000481
HR__bpm	15552	0.000561	1.271	1.10913	1.45652	5547	0.0389	2.47507	1.04735	5.84905	5751	0.000509	1.5863	1.22291	2.05767	2145	0.108	1.22093	0.956924	1.55776	2109	0.388	1.08704	0.899554	1.3136	0.000509
Phosphorus_.PO4.__mg_dl	9158	0.0621	1.1131	0.99459	1.24573	1517	0.000593	2.67426	1.5255	4.68797	3538	0.0634	1.21455	0.989207	1.49122	2046	0.482	0.931233	0.763322	1.1361	2057	0.581	1.04871	0.88568	1.24176	0.000593
Albumincreatinine_ratio.urine__mg_g	5329	0.000703	1.52836	1.19593	1.95322	928	NA	NA	NA	NA	2760	0.128	1.4504	0.898349	2.34174	1074	0.0433	1.50815	1.01254	2.24625	567	NA	NA	NA	NA	0.000703
WT__kg	65427	0.00095	1.17062	1.06563	1.28261	26334	0.0142	1.60727	1.10249	2.35347	24035	0.108	1.13482	0.972831	1.32194	8067	0.0571	1.15445	0.995777	1.33772	6991	0.827	1.01393	0.895905	1.14573	0.00095
Alanine_aminotransferase_.ALT.__u_l	46339	0.403	0.966658	0.892791	1.04659	14498	0.881	1.03303	0.673933	1.58351	18536	0.00104	0.775074	0.665617	0.902533	6948	0.428	1.0589	0.91925	1.21981	6357	0.486	1.0409	0.929885	1.16515	0.00104
Triiodothyronine.total_.T3.__ng_dl	1147	0.00106	0.376064	0.209364	0.675517	425	NA	NA	NA	NA	434	NA	NA	NA	NA	168	NA	NA	NA	NA	120	NA	NA	NA	NA	0.00106
Creatinine.urine.concentration__mg_dl	10377	0.0029	0.799906	0.690608	0.926512	2402	0.062	0.519526	0.261151	1.03355	4780	0.00131	0.662607	0.515518	0.851664	1963	0.701	1.0509	0.815806	1.35373	1232	0.0994	0.816437	0.641453	1.03919	0.00131
Fibrin_D.Dimer__NA	1688	0.00148	1.76958	1.24488	2.51642	498	NA	NA	NA	NA	659	NA	NA	NA	NA	282	NA	NA	NA	NA	249	NA	NA	NA	NA	0.00148
Herpes_Zoster	122250	0.0016	0.931355	0.891115	0.97341	52954	0.438	0.893146	0.67126	1.18838	42915	0.177	0.927858	0.832324	1.03436	13658	0.00813	0.851724	0.756274	0.959219	12723	0.0988	0.930991	0.855219	1.01347	0.0016
BMI__NA	64941	0.00169	1.14888	1.05358	1.25283	26189	0.0267	1.61012	1.05648	2.45389	23871	0.00667	1.23631	1.06065	1.44106	7996	0.0582	1.15216	0.995111	1.334	6885	0.581	0.967802	0.861579	1.08713	0.00169
Partial_thromboplastin_time_.PTT.__sec	9135	0.00178	1.17516	1.062	1.30038	1746	0.744	1.09381	0.638324	1.87433	3452	0.282	1.11939	0.911538	1.37464	1935	0.0171	1.26794	1.04315	1.54117	2002	0.0563	1.17534	0.995641	1.38748	0.00178
Monocyte.percent__.	45076	0.00235	0.897144	0.836545	0.962121	14945	0.652	0.911105	0.608196	1.36462	16715	0.497	0.951646	0.824802	1.09781	6681	0.0533	0.870153	0.755645	1.00204	6735	0.0154	0.87514	0.785615	0.974864	0.00235
Ethanol.concentration__mg_dl	1650	0.00258	0.501689	0.320351	0.785652	562	NA	NA	NA	NA	651	NA	NA	NA	NA	261	NA	NA	NA	NA	176	NA	NA	NA	NA	0.00258
Lactic_acid__mmol_l	8392	0.0319	1.1356	1.01108	1.27546	1636	0.0034	2.58195	1.36856	4.87108	3029	0.413	1.09779	0.877874	1.37281	1761	0.15	1.17188	0.944476	1.454	1966	0.247	1.10861	0.93111	1.31996	0.0034
High potassium	122250	0.344	1.01823	0.980838	1.05704	52954	0.00361	1.15002	1.0467	1.26354	42915	0.00368	1.10513	1.03303	1.18227	13658	0.914	0.994419	0.897929	1.10128	12723	0.146	0.935178	0.854315	1.0237	0.00361
Prothrombin_time_.PT.__sec	12448	0.00788	1.13129	1.03292	1.23906	2390	0.0381	1.48668	1.02207	2.16251	4613	0.00384	1.29832	1.08767	1.54973	2599	0.181	1.13348	0.94329	1.362	2846	0.557	1.04674	0.898837	1.21895	0.00384
Eosinophil.absolute__x10.3_ul	41886	0.872	0.993898	0.922807	1.07051	13607	0.636	1.10101	0.73924	1.63975	15685	0.00397	0.806921	0.697333	0.933729	6266	0.00774	1.21655	1.05316	1.40527	6328	0.473	0.96098	0.861929	1.07142	0.00397
SBP__mm_Hg	66718	0.615	1.01969	0.945156	1.1001	26875	0.00433	1.71256	1.18346	2.47822	24391	0.373	1.06918	0.922957	1.23856	8198	0.728	1.02537	0.89036	1.18086	7254	0.186	0.929559	0.834172	1.03586	0.00433
Peptic ulcer disease	122250	0.143	1.02861	0.990517	1.06817	52954	0.00437	1.2102	1.06139	1.37989	42915	0.156	1.06297	0.976971	1.15654	13658	0.384	1.0429	0.948759	1.14639	12723	0.514	0.973647	0.898644	1.05491	0.00437
Basophil.absolute__x10.3_ul	33620	0.0235	1.09999	1.01289	1.19458	10505	0.0628	1.56198	0.976441	2.49862	12727	0.888	1.01185	0.858298	1.19294	5150	0.00443	1.26644	1.07633	1.49014	5238	0.861	1.01115	0.893147	1.14469	0.00443
Prothrombin.INR__no_units	13421	0.28	1.05013	0.960941	1.14762	2503	0.0989	1.37772	0.941625	2.01578	4955	0.00445	1.28051	1.07989	1.5184	2812	0.963	1.00433	0.838308	1.20324	3151	0.581	0.959315	0.827723	1.11182	0.00445
Cholesterol.totalHDL_ratio__no_units	23392	0.00518	1.20296	1.05678	1.36938	6702	0.169	1.6854	0.801263	3.54512	10550	0.00507	1.42539	1.11242	1.82639	3558	0.272	1.14142	0.901556	1.44509	2582	0.508	1.06682	0.880971	1.29189	0.00507
Vitamin_B12__pg_ml	9614	0.623	1.03467	0.903128	1.18536	2552	0.00565	2.91144	1.36584	6.206	3609	0.089	1.30144	0.960617	1.76313	1690	0.0899	1.28328	0.96186	1.71211	1763	0.0205	0.793354	0.652305	0.964895	0.00565
Platelet_count_.PLT.__x10.3_ul	50511	0.0082	0.90271	0.836693	0.973838	17102	0.0215	0.628394	0.423184	0.933372	18772	0.00575	0.809951	0.697527	0.940446	7324	0.67	0.969542	0.841524	1.12396	7313	0.465	0.960359	0.861411	1.07356	0.00575
Alcohol abuse	122250	0.0248	1.05304	1.00655	1.10168	52954	0.0434	1.1751	1.00481	1.37424	42915	0.0066	1.11658	1.03117	1.20905	13658	0.613	1.02379	0.93468	1.1214	12723	0.101	0.932935	0.858718	1.01356	0.0066
Procalcitonin_.PCT.__ng_ml	2481	0.00739	1.28947	1.0706	1.55312	344	NA	NA	NA	NA	874	NA	NA	NA	NA	625	NA	NA	NA	NA	638	NA	NA	NA	NA	0.00739
Testosterone.total__ng_dl	1496	0.00765	0.23979	0.0839496	0.683643	656	NA	NA	NA	NA	639	NA	NA	NA	NA	145	NA	NA	NA	NA	56	NA	NA	NA	NA	0.00765
Platelet_mean_volume_.MPV.__fl	36567	0.189	0.945344	0.869223	1.02804	12665	0.826	1.05565	0.65142	1.71081	13091	0.0085	0.792882	0.66703	0.942503	5292	0.542	0.94917	0.802794	1.12232	5519	0.737	1.02176	0.900993	1.15872	0.0085
Hispanic	122250	0.242	0.955826	0.886144	1.031	52954	0.00924	0.669098	0.49441	0.905509	42915	0.892	0.992272	0.887086	1.10992	13658	0.865	1.00912	0.908965	1.12032	12723	0.791	0.988297	0.905773	1.07834	0.00924
Parathyroid_hormone_.PTH.__pg_ml	2659	0.00931	1.38474	1.08342	1.76983	414	NA	NA	NA	NA	1081	0.115	1.47871	0.908629	2.40659	657	NA	NA	NA	NA	507	NA	NA	NA	NA	0.00931
Bilirubin.total__mg_dl	45332	0.753	0.987366	0.912257	1.0687	14217	0.00935	0.571131	0.374359	0.871333	18095	0.0985	0.879242	0.754739	1.02432	6798	0.438	1.05974	0.915235	1.2271	6222	0.194	1.07963	0.961728	1.21201	0.00935
Bicarbonate_.HCO3.__mmol_l	6260	0.883	0.988666	0.849619	1.15005	1708	0.00981	0.443587	0.239357	0.822087	2360	0.671	0.939883	0.706045	1.25079	1160	0.881	1.02375	0.753707	1.39068	1032	0.58	1.0755	0.831371	1.3914	0.00981
Basophil.percent__.	40458	0.25	0.955943	0.885235	1.03232	13109	0.276	1.24076	0.841943	1.82847	15209	0.0119	0.815296	0.69531	0.955984	6059	0.816	0.982758	0.848921	1.13769	6081	0.845	1.01143	0.902858	1.13308	0.0119
Transferrin_saturation__.	6870	0.0149	0.815058	0.691315	0.960949	2050	0.23	1.54699	0.758182	3.15641	2475	0.0414	0.72281	0.529124	0.987394	1197	0.0126	0.685881	0.510019	0.922383	1148	0.431	0.901383	0.696229	1.16693	0.0126
Cholesterol.in_VLDL__mg_dl	4665	0.0127	1.66591	1.1151	2.48877	1472	0.122	4.5999	0.663774	31.8769	2166	0.0186	2.56919	1.17069	5.63848	650	NA	NA	NA	NA	377	NA	NA	NA	NA	0.0127
Self_Monitored_Blood_Glucose_.SMBG.__NA	1370	0.0175	1.70393	1.0979	2.64429	325	NA	NA	NA	NA	652	NA	NA	NA	NA	261	NA	NA	NA	NA	132	NA	NA	NA	NA	0.0175
Granulocytes.immature100_leukocytes__.	1965	0.0187	1.40061	1.05776	1.85456	483	NA	NA	NA	NA	728	NA	NA	NA	NA	378	NA	NA	NA	NA	376	NA	NA	NA	NA	0.0187
Protein.urine.dipstick__mg_dl	4783	0.0476	1.17433	1.00174	1.37671	1380	0.0189	2.54919	1.16732	5.56715	1452	0.094	1.34412	0.950858	1.89998	879	NA	NA	NA	NA	1072	0.666	1.05671	0.82251	1.35755	0.0189
Rheumatic disease	122250	0.253	1.0247	0.982677	1.06852	52954	0.0199	1.19656	1.02874	1.39177	42915	0.0837	1.08702	0.988954	1.1948	13658	0.0528	0.891721	0.794067	1.00138	12723	0.364	1.03749	0.958258	1.12328	0.0199
Oxygen_saturation_.SO2..other.performed__.	4205	0.0202	1.21564	1.0291	1.43637	873	NA	NA	NA	NA	1659	0.165	1.24577	0.91355	1.70116	871	NA	NA	NA	NA	802	NA	NA	NA	NA	0.0202
Granulocytes.immature__x10.3_ul	1631	0.0209	1.37236	1.04901	1.79537	428	NA	NA	NA	NA	588	NA	NA	NA	NA	303	NA	NA	NA	NA	312	NA	NA	NA	NA	0.0209
UROUT__ml	9340	0.0247	0.860177	0.752812	0.980746	2027	0.0244	0.43773	0.213048	0.898731	3324	0.963	1.00577	0.786838	1.27073	1842	0.186	0.853293	0.674672	1.07412	2147	0.0643	0.846678	0.710252	1	0.0244
Blood_urea_nitrogencreatinine_ratio_.BUNCREA.__no_units	15513	0.644	0.97134	0.858571	1.0989	4543	0.0425	0.629565	0.40263	0.984407	6145	0.0246	0.779565	0.627448	0.968567	2528	0.226	1.16583	0.909643	1.49417	2297	0.182	1.13856	0.941131	1.37743	0.0246
Metamyelocyte.percent__.	1579	0.0261	0.731359	0.555179	0.963454	325	NA	NA	NA	NA	610	NA	NA	NA	NA	316	NA	NA	NA	NA	328	NA	NA	NA	NA	0.0261
Reticulocyte.percent__.	1470	0.0265	1.38326	1.03858	1.84239	325	NA	NA	NA	NA	503	NA	NA	NA	NA	325	NA	NA	NA	NA	317	NA	NA	NA	NA	0.0265
West_Pacific	122250	0.366	0.96544	0.89449	1.04203	52954	0.0409	0.639396	0.416464	0.981657	42915	0.0307	0.850923	0.735045	0.98507	13658	0.767	0.98363	0.881943	1.09705	12723	0.0595	1.07563	0.997093	1.16036	0.0307
Anion_gap__mmol_l	40495	0.0459	1.08702	1.0013	1.17968	12393	0.0318	1.59371	1.04107	2.43933	15355	0.134	1.12849	0.963339	1.32225	6262	0.801	0.980581	0.842128	1.14176	6485	0.283	1.06817	0.947029	1.20455	0.0318
Magnesium_.Mg.__mg_dl	13910	0.104	1.08024	0.984207	1.18566	2651	0.288	1.3029	0.799363	2.12362	5244	0.108	1.16036	0.968095	1.39084	2860	0.245	0.899216	0.751687	1.07569	3155	0.0414	1.16231	1.00585	1.34308	0.0414
LVEF__.	7948	0.0443	0.878909	0.774979	0.996668	871	NA	NA	NA	NA	3172	0.823	0.970859	0.748859	1.25718	1871	0.158	0.837623	0.654955	1.07158	2034	0.238	0.895049	0.74444	1.07725	0.0443
Immunoglobulin_M_.IgM..quantitative__mg_dl	1022	0.0555	0.727144	0.524772	1.00756	210	NA	NA	NA	NA	428	NA	NA	NA	NA	220	NA	NA	NA	NA	164	NA	NA	NA	NA	0.0555
Oxygen_saturation_.SO2..other.performed__mm_Hg	3742	0.0622	1.17961	0.991599	1.40326	811	NA	NA	NA	NA	1475	0.369	1.15834	0.840549	1.59627	749	NA	NA	NA	NA	707	NA	NA	NA	NA	0.0622
Glucose.urine.dipstick__mg_dl	1484	0.0625	1.33415	0.98505	1.807	375	NA	NA	NA	NA	588	NA	NA	NA	NA	290	NA	NA	NA	NA	231	NA	NA	NA	NA	0.0625
Hepatitis_C_antibody_sco_ratio_.HCV..quantitative__no_units	1190	0.0631	1.82404	0.967643	3.43835	534	NA	NA	NA	NA	509	NA	NA	NA	NA	116	NA	NA	NA	NA	31	NA	NA	NA	NA	0.0631
Vancomycin.trough__ug_ml	1380	0.0678	1.27281	0.982547	1.64921	219	NA	NA	NA	NA	586	NA	NA	NA	NA	330	NA	NA	NA	NA	245	NA	NA	NA	NA	0.0678
Gamma.glutamyl_transferase_.GGT.__u_l	1574	0.0699	1.34773	0.976009	1.86092	538	NA	NA	NA	NA	656	NA	NA	NA	NA	200	NA	NA	NA	NA	180	NA	NA	NA	NA	0.0699
Triiodothyronine.free_.FT3.__pg_ml	1772	0.0755	0.658284	0.41514	1.04383	564	NA	NA	NA	NA	752	NA	NA	NA	NA	269	NA	NA	NA	NA	187	NA	NA	NA	NA	0.0755
Sodium_.Na..urine.concentration__mmol_l	1507	0.0768	0.806288	0.635201	1.02353	168	NA	NA	NA	NA	616	NA	NA	NA	NA	373	NA	NA	NA	NA	350	NA	NA	NA	NA	0.0768
Carbon_dioxide__mm_Hg	1180	0.0788	0.757377	0.555557	1.03251	251	NA	NA	NA	NA	453	NA	NA	NA	NA	224	NA	NA	NA	NA	252	NA	NA	NA	NA	0.0788
Epithelial_cells.urine.microscopic__NA	1161	0.0812	1.50808	0.95027	2.39338	311	NA	NA	NA	NA	364	NA	NA	NA	NA	181	NA	NA	NA	NA	305	NA	NA	NA	NA	0.0812
Specific_gravity.urine.dipstick__no_units	29803	0.366	0.956798	0.869433	1.05294	10382	0.453	0.832347	0.515357	1.34431	10360	0.431	0.928075	0.77079	1.11746	4309	0.0862	0.860025	0.723945	1.02168	4752	0.288	1.06903	0.945276	1.20899	0.0862
Human_chorionic_gonadotropin_.HCG..quantitative__u_l	1912	0.0902	0.0981339	0.00669418	1.43878	1746	0.218	0.186723	0.0129168	2.69933	152	NA	NA	NA	NA	9	NA	NA	NA	NA	5	NA	NA	NA	NA	0.0902
Red_blood_cells_.RBC..urine.microscopic__NA	1399	0.0939	1.29525	0.956965	1.75317	365	NA	NA	NA	NA	441	NA	NA	NA	NA	236	NA	NA	NA	NA	357	NA	NA	NA	NA	0.0939
Folate__ng_ml	5204	0.511	0.941565	0.786683	1.12692	1309	0.0948	0.409333	0.143511	1.16752	1906	0.839	0.961524	0.659299	1.40226	969	NA	NA	NA	NA	1020	0.63	0.9368	0.718027	1.22219	0.0948
Acetaminophen__ug_ml	1037	0.107	0.645955	0.379662	1.09905	432	NA	NA	NA	NA	398	NA	NA	NA	NA	126	NA	NA	NA	NA	81	NA	NA	NA	NA	0.107
HIV (AIDS)	122250	0.613	1.01382	0.961242	1.06928	52954	0.111	1.09212	0.98001	1.21705	42915	0.661	0.978426	0.887604	1.07853	13658	0.661	0.975797	0.874654	1.08863	12723	0.798	1.00968	0.937873	1.08699	0.111
Bands.percent__.	2881	0.12	1.15597	0.962965	1.38771	614	NA	NA	NA	NA	1064	0.398	1.15346	0.828102	1.60655	566	NA	NA	NA	NA	637	NA	NA	NA	NA	0.12
pH__no_units	1103	0.123	1.27247	0.936454	1.72906	244	NA	NA	NA	NA	411	NA	NA	NA	NA	207	NA	NA	NA	NA	241	NA	NA	NA	NA	0.123
Epithelial_cells.urine.microscopic___hpf	4127	0.294	0.873367	0.678294	1.12455	1447	0.536	0.664162	0.181913	2.42491	1343	0.127	0.630309	0.348149	1.1411	618	NA	NA	NA	NA	719	NA	NA	NA	NA	0.127
Transferrin.direct__mg_dl	1649	0.129	0.768892	0.547826	1.07427	455	NA	NA	NA	NA	573	NA	NA	NA	NA	282	NA	NA	NA	NA	339	NA	NA	NA	NA	0.129
Prostate_specific_antigen.total_.PSA.__ng_ml	5984	0.516	0.939911	0.779602	1.1333	529	NA	NA	NA	NA	3804	0.248	0.815026	0.576176	1.15289	1204	0.132	0.759735	0.531118	1.08678	447	NA	NA	NA	NA	0.132
High total CO2	122250	0.315	0.978729	0.93852	1.02066	52954	0.753	0.967504	0.787501	1.18865	42915	0.257	1.05424	0.96225	1.15501	13658	0.226	0.937006	0.843425	1.04097	12723	0.133	0.936578	0.859826	1.0202	0.133
Ketones.urine.dipstick__mg_dl	1501	0.134	0.769155	0.545532	1.08437	631	NA	NA	NA	NA	415	NA	NA	NA	NA	230	NA	NA	NA	NA	225	NA	NA	NA	NA	0.134
Immunoglobulin_A_.IgA..quantitative__mg_dl	1599	0.137	0.783713	0.568422	1.08521	521	NA	NA	NA	NA	618	NA	NA	NA	NA	270	NA	NA	NA	NA	190	NA	NA	NA	NA	0.137
Mean_corpuscular_volume_.MCV.__fl	50454	0.591	0.980525	0.912713	1.05393	17059	0.141	1.32652	0.910914	1.93266	18761	0.558	0.958824	0.832976	1.10416	7328	0.504	0.954306	0.831961	1.0943	7306	0.748	0.983111	0.885882	1.09152	0.141
Rheumatoid_factor_.RF..quantitative__u_ml	1478	0.144	1.44197	0.882746	2.35543	563	NA	NA	NA	NA	639	NA	NA	NA	NA	185	NA	NA	NA	NA	91	NA	NA	NA	NA	0.144
Thyroxine.total_.T4.__ug_dl	1611	0.153	0.660807	0.374624	1.16551	479	NA	NA	NA	NA	652	NA	NA	NA	NA	275	NA	NA	NA	NA	205	NA	NA	NA	NA	0.153
PH.arterial_blood__no_units	2682	0.156	0.87631	0.730312	1.0515	395	NA	NA	NA	NA	1111	0.285	0.837367	0.604824	1.15932	647	NA	NA	NA	NA	529	NA	NA	NA	NA	0.156
South_East_South_Central	122250	0.504	0.9827	0.933614	1.03436	52954	0.452	0.189017	0.00246514	14.4932	42915	0.156	1.06519	0.976165	1.16232	13658	0.999	0.999926	0.908321	1.10077	12723	0.177	0.941244	0.862089	1.02767	0.156
Immunoglobulin_G_.IgG..quantitative__mg_dl	1228	0.165	0.821129	0.621762	1.08438	289	NA	NA	NA	NA	506	NA	NA	NA	NA	249	NA	NA	NA	NA	184	NA	NA	NA	NA	0.165
White_blood_cells_.WBC..urine.microscopic___hpf	7491	0.653	0.965196	0.827033	1.12656	2407	0.525	1.29679	0.581524	2.89179	2531	0.649	1.08489	0.764235	1.54015	1192	0.929	1.01469	0.735763	1.39931	1361	0.17	0.850418	0.674818	1.07174	0.17
FEV1_FVC_RATIO__.	1004	0.178	0.732041	0.465193	1.15171	140	NA	NA	NA	NA	474	NA	NA	NA	NA	256	NA	NA	NA	NA	134	NA	NA	NA	NA	0.178
Carbon_dioxide.partial_pressure_.PCO2..arterial_blood__mm_Hg	2632	0.345	1.09683	0.905219	1.329	394	NA	NA	NA	NA	1097	0.184	1.26617	0.893777	1.7937	629	NA	NA	NA	NA	512	NA	NA	NA	NA	0.184
Uric_acid__mg_dl	3859	0.184	1.17534	0.925847	1.49207	913	NA	NA	NA	NA	1641	0.467	0.848083	0.543852	1.32248	727	NA	NA	NA	NA	578	NA	NA	NA	NA	0.184
Bicarbonate_.HCO3..arterial_blood__mmol_l	2898	0.702	1.03588	0.864731	1.2404	421	NA	NA	NA	NA	1216	0.209	1.23409	0.889055	1.71327	676	NA	NA	NA	NA	585	NA	NA	NA	NA	0.209
Thyroid_stimulating_hormone_.TSH.__uu_ml	27817	0.716	0.982386	0.892681	1.08116	9003	0.357	1.31555	0.734117	2.35747	10899	0.265	1.1364	0.907456	1.42319	4006	0.899	0.98742	0.81148	1.20152	3909	0.214	0.913735	0.792463	1.05353	0.214
Creatine_kinase.total_.CK.__u_l	4995	0.427	1.06814	0.907937	1.25655	966	NA	NA	NA	NA	1987	0.852	0.970291	0.707181	1.33123	1052	0.217	1.21469	0.892293	1.6536	990	NA	NA	NA	NA	0.217
Oxygen_saturation_.SO2..arterial_blood__.	2239	0.231	0.88708	0.729153	1.07918	304	NA	NA	NA	NA	960	NA	NA	NA	NA	529	NA	NA	NA	NA	446	NA	NA	NA	NA	0.231
Lipase__u_l	8517	0.741	1.02577	0.882227	1.19259	3078	0.244	1.46221	0.771677	2.77071	2989	0.773	0.959176	0.723022	1.27251	1226	0.969	1.00583	0.752673	1.34421	1224	0.803	1.03276	0.801565	1.33053	0.244
Casts.urine.microscopic___lpf	1847	0.25	0.857477	0.659871	1.11418	441	NA	NA	NA	NA	612	NA	NA	NA	NA	371	NA	NA	NA	NA	423	NA	NA	NA	NA	0.25
TEMP__deg_c	57223	0.938	0.996651	0.915994	1.08441	23358	0.261	0.790356	0.524311	1.1914	20510	0.924	0.99238	0.848175	1.1611	6967	0.309	1.0809	0.930388	1.25576	6388	0.794	0.985136	0.880612	1.10207	0.261
Lymphocyte.atypical.percent__.	1296	0.267	0.842056	0.621672	1.1406	303	NA	NA	NA	NA	486	NA	NA	NA	NA	233	NA	NA	NA	NA	274	NA	NA	NA	NA	0.267
Rubella.performed__other_unit	1175	0.268	0.392408	0.0750491	2.05192	882	NA	NA	NA	NA	249	NA	NA	NA	NA	33	NA	NA	NA	NA	11	NA	NA	NA	NA	0.268
PH.urine.dipstick__no_units	30296	0.283	1.0476	0.962401	1.14033	10474	0.732	1.0858	0.677828	1.73933	10551	0.809	1.02244	0.853737	1.22447	4413	0.812	1.01998	0.86688	1.2001	4858	0.475	1.04564	0.925045	1.18197	0.283
Red_blood_cells_.RBC..urine.microscopic___hpf	6593	0.288	1.09007	0.929859	1.27794	2109	0.88	1.07755	0.409943	2.83243	2220	0.407	1.15417	0.822634	1.61925	1040	0.624	1.08365	0.786172	1.49371	1224	0.525	1.0799	0.852214	1.36837	0.288
Glucose.fasting__mg_dl	2514	0.29	1.22852	0.839091	1.79869	933	NA	NA	NA	NA	1051	0.673	1.17953	0.547972	2.53899	315	NA	NA	NA	NA	215	NA	NA	NA	NA	0.29
Varicella	122250	0.304	0.959448	0.886569	1.03832	52954	0.992	0.373823	0	NA	42915	0.991	1.00058	0.907641	1.10303	13658	0.976	0.51544	0	NA	12723	0.541	0.964693	0.859663	1.08256	0.304
Oxygen.partial_pressure_.PO2..arterial_blood__mm_Hg	2551	0.411	0.917808	0.747973	1.12616	373	NA	NA	NA	NA	1059	0.31	0.828717	0.576467	1.19134	613	NA	NA	NA	NA	506	NA	NA	NA	NA	0.31
White_blood_cells_.WBC..urine.microscopic__NA	1467	0.33	1.17285	0.85082	1.61692	378	NA	NA	NA	NA	465	NA	NA	NA	NA	260	NA	NA	NA	NA	364	NA	NA	NA	NA	0.33
Lactate_dehydrogenase.total_.LDH.__u_l	3116	0.387	1.09368	0.892756	1.33982	855	NA	NA	NA	NA	1175	0.728	1.06518	0.745892	1.52113	573	NA	NA	NA	NA	513	NA	NA	NA	NA	0.387
Amylase.total__u_l	1471	0.416	1.16053	0.810466	1.66178	482	NA	NA	NA	NA	564	NA	NA	NA	NA	218	NA	NA	NA	NA	207	NA	NA	NA	NA	0.416
PAIN__out_of_10	33513	0.59	0.971996	0.876666	1.0778	12483	0.625	0.88764	0.550419	1.43114	12494	0.452	0.930469	0.771062	1.12318	4596	0.857	1.0162	0.853738	1.20981	3940	0.572	0.958426	0.827167	1.11032	0.452
ABO_A	16593	0.501	0.966596	0.875526	1.06718	6155	0.677	0.903648	0.561143	1.4552	5243	0.764	0.97227	0.809315	1.16803	2660	0.471	0.934274	0.77649	1.12411	2535	0.999	1.00006	0.847637	1.17988	0.471
Ammonia_.NH3.__umol_l	1429	0.504	1.09555	0.83836	1.43158	195	NA	NA	NA	NA	591	NA	NA	NA	NA	360	NA	NA	NA	NA	283	NA	NA	NA	NA	0.504
ESTIMATED_AVERAGE_GLUCOSE__mg_dl	1976	0.556	0.89502	0.618906	1.29431	532	NA	NA	NA	NA	924	NA	NA	NA	NA	324	NA	NA	NA	NA	196	NA	NA	NA	NA	0.556
Myelocyte.percent__.	1319	0.659	1.06695	0.799999	1.42305	260	NA	NA	NA	NA	520	NA	NA	NA	NA	278	NA	NA	NA	NA	261	NA	NA	NA	NA	0.659
Hepatitis_B_surface_antibody_.HBsAb.__mu_ml	1400	0.773	1.07298	0.664627	1.73212	734	NA	NA	NA	NA	474	NA	NA	NA	NA	134	NA	NA	NA	NA	58	NA	NA	NA	NA	0.773
Calcium.ionized__mg_dl	3659	0.794	0.975545	0.81028	1.17451	780	NA	NA	NA	NA	1407	0.988	0.997454	0.713719	1.39396	769	NA	NA	NA	NA	703	NA	NA	NA	NA	0.794
Base_excessdeficit.arterial_blood__mmol_l	2273	0.883	0.985209	0.808057	1.20124	309	NA	NA	NA	NA	956	NA	NA	NA	NA	527	NA	NA	NA	NA	481	NA	NA	NA	NA	0.883
Reticulocyte.absolute__x10.3_ul	1052	0.98	1.0047	0.69839	1.44572	270	NA	NA	NA	NA	354	NA	NA	NA	NA	218	NA	NA	NA	NA	210	NA	NA	NA	NA	0.98

## Sheet: Tabelle1
age	0	122250	0	17.8452	16.3361	19.4935	52954	1.7e-21	5.45905	3.84762	7.74573	42915	3.64e-45	2.29494	2.04562	2.5767	13658	8.57e-13	1.43658	1.30082	1.5865	12723	2.45e-10	1.30738	1.20318	1.42086
N_comorb	1	122250	0	22.1377	19.7395	24.8278	52954	9.07e-96	87.7819	57.5384	133.921	42915	4.01e-276	32.9231	27.1476	39.9278	13658	1.07e-148	11.2067	9.33847	13.449	12723	1.09e-81	3.45304	3.04148	3.92025
charlson_score	1	122250	9.07e-314	3.61568	3.38301	3.86456	52954	7.95e-71	4.77231	4.01762	5.66883	42915	2.07e-161	4.82306	4.30372	5.40512	13658	1.22e-74	3.1865	2.81407	3.60824	12723	8.09e-38	1.87287	1.70207	2.06102
Albumin__g_dl	0	46191	5.1e-112	0.471429	0.441528	0.503353	14407	7.34e-25	0.260169	0.201342	0.336182	18425	9.26e-70	0.371798	0.33312	0.414968	6971	2.37e-41	0.423009	0.373232	0.479422	6388	3.8e-09	0.722852	0.648879	0.805255
GENDER	0	122250	2.39e-100	1.76499	1.67493	1.85986	52954	5.12e-11	2.33929	1.81519	3.01467	42915	1.17e-47	2.23522	2.00498	2.4919	13658	1.59e-15	1.5118	1.36572	1.67353	12723	6.98e-25	1.51246	1.39798	1.6363
Hemoglobin_.HGB.__g_dl	0	50984	2.9e-89	0.501949	0.469204	0.53696	17319	4.71e-18	0.253513	0.185827	0.345844	18927	9.44e-59	0.368923	0.326902	0.416349	7376	1.35e-30	0.46971	0.412951	0.53428	7362	1e-08	0.740498	0.668186	0.820644
ePVS	1	122250	4.71e-84	1.48652	1.42824	1.54719	52954	8.8e-18	2.11827	1.7848	2.51405	42915	1.03e-60	1.87371	1.73854	2.01939	13658	3.28e-31	1.67577	1.536	1.82824	12723	1.13e-08	1.24645	1.15568	1.34436
Red_cell_distribution_width.CV_.RDW.CV.__.	1	50295	4.86e-82	1.83758	1.72684	1.95544	16989	1.2e-09	2.42195	1.82108	3.22109	18714	3.77e-55	2.44824	2.18842	2.7389	7303	1.9e-23	1.82968	1.62494	2.06022	7289	1.26e-11	1.39759	1.26856	1.53975
E872	0	122250	2.56e-81	1.34401	1.30384	1.38542	52954	5.65e-25	1.64532	1.49687	1.80849	42915	5.23e-50	1.59606	1.50066	1.69753	13658	1.51e-27	1.53618	1.42179	1.65973	12723	6.62e-08	1.21386	1.13144	1.30231
AcidBaseBalance	0	122250	3.42e-77	1.4518	1.39587	1.50999	52954	6.28e-22	2.00299	1.73877	2.30734	42915	1.98e-46	1.81324	1.67129	1.96724	13658	3.12e-25	1.63493	1.48998	1.79401	12723	8.98e-09	1.26061	1.16486	1.3642
FluidsLytes	0	122250	3.97e-76	1.51115	1.44637	1.57884	52954	5.74e-20	2.11823	1.8036	2.48774	42915	1.53e-51	1.95771	1.7943	2.13604	13658	5.39e-25	1.67706	1.5203	1.84995	12723	2.14e-07	1.2442	1.14557	1.35125
Hematocrit_.HCT.__.	0	50883	2.57e-75	0.54135	0.50705	0.578004	17237	1.86e-18	0.263289	0.195371	0.354826	18917	2.19e-52	0.398213	0.35371	0.448286	7371	6.91e-28	0.490007	0.431244	0.556787	7358	5.11e-06	0.788049	0.711351	0.872963
Blood_urea_nitrogen_.BUN.__mg_dl	1	53846	2.58e-67	1.89946	1.76655	2.0424	16891	3.04e-18	3.56984	2.68092	4.75348	21231	9.56e-39	2.2086	1.96024	2.48844	8072	6.88e-15	1.64911	1.45399	1.87037	7652	3.19e-11	1.4165	1.27809	1.56988
Red_blood_cell_count_.RBC.__x10.6_ul	0	50543	4.07e-60	0.56747	0.530222	0.607337	17103	4.98e-18	0.274697	0.205001	0.368084	18791	1.43e-41	0.428945	0.379363	0.485005	7332	1.37e-22	0.523937	0.460275	0.596399	7317	0.000179	0.821896	0.741737	0.910713
LLR	0	122250	1.78e-59	0.678069	0.647053	0.71057	52954	1.49e-13	0.429589	0.343322	0.537531	42915	9.26e-47	0.491325	0.445907	0.541371	13658	2.73e-18	0.642372	0.58156	0.709546	12723	1.9e-06	0.822261	0.758651	0.891208
CHF	0	122250	1.97e-58	1.33569	1.28948	1.38354	52954	3.78e-15	1.48939	1.34858	1.64491	42915	9.15e-43	1.64351	1.53081	1.76453	13658	1.38e-23	1.58005	1.44466	1.72816	12723	5.71e-08	1.24433	1.14985	1.34652
Calcium.total__mg_dl	0	53348	8.85e-58	0.587942	0.550959	0.627407	16648	2.64e-12	0.336467	0.247972	0.456542	21053	1.86e-38	0.434298	0.382864	0.49264	8018	4.42e-21	0.536493	0.471309	0.610691	7629	2.73e-07	0.759252	0.683581	0.843305
VolumeUp	0	122250	8.85e-57	1.30504	1.26284	1.34863	52954	1.5e-27	1.70973	1.55222	1.88324	42915	7.21e-48	1.63203	1.52773	1.74347	13658	1.03e-21	1.50499	1.38417	1.63635	12723	0.00552	1.11609	1.03277	1.20611
VolumeDown	0	122250	3.72e-50	1.30368	1.25894	1.34998	52954	2.69e-09	1.54674	1.33974	1.78575	42915	1.39e-27	1.48241	1.38095	1.59131	13658	1.9e-21	1.51504	1.3907	1.65045	12723	9.86e-09	1.2499	1.15809	1.34894
Renal	0	122250	1.27e-48	1.30753	1.26145	1.35526	52954	9.04e-20	1.57997	1.43173	1.74356	42915	2.85e-45	1.68219	1.56504	1.80812	13658	1.48e-15	1.45309	1.32565	1.59281	12723	2.61e-05	1.18586	1.09524	1.28388
NLR	1	122250	3.41e-46	1.37105	1.31288	1.43177	52954	1.98e-09	1.91715	1.5499	2.37136	42915	9.6e-41	1.79984	1.65121	1.96185	13658	4.09e-16	1.47425	1.34267	1.6188	12723	0.000144	1.16205	1.07544	1.25557
Glucose.random__mg_dl	1	54036	6.52e-44	1.56545	1.46956	1.66757	17139	5.18e-11	2.21186	1.74518	2.80333	21136	1.11e-17	1.68672	1.49645	1.90115	8091	6.75e-18	1.6663	1.48364	1.87147	7670	2.03e-05	1.23811	1.12226	1.36591
E875	0	122250	2.29e-43	1.24282	1.20505	1.28175	52954	7.98e-17	1.44906	1.32797	1.58117	42915	2.98e-34	1.47482	1.3856	1.56979	13658	1.59e-14	1.38028	1.2713	1.49861	12723	0.00199	1.12582	1.04434	1.21366
WithoutComorb	0	122250	2.29e-43	0.0607558	0.0408249	0.0904185	52954	1.27e-10	0.026418	0.00872808	0.0799617	42915	1.13e-16	0.0718732	0.0385686	0.133935	13658	6.3e-09	0.28054	0.182696	0.430791	12723	4e-09	0.391473	0.286443	0.535021
Lymphocyte.percent__.	0	45361	2.45e-43	0.557976	0.513586	0.606121	15080	7.37e-11	0.255986	0.169873	0.385741	16826	7.25e-37	0.343625	0.291327	0.405265	6692	6.47e-13	0.56943	0.488364	0.663912	6763	0.00287	0.840351	0.74954	0.94215
RESP__breaths_min	1	51169	5e-43	2.20993	1.97376	2.47437	20162	0.000942	2.8344	1.52867	5.25542	18245	1.12e-24	2.76564	2.27699	3.35915	6569	3.65e-21	2.79522	2.25814	3.46006	6193	1.32e-05	1.32747	1.16867	1.50787
E871	0	122250	5.65e-43	1.25659	1.21632	1.29822	52954	4.79e-19	1.55958	1.41444	1.71962	42915	8.25e-43	1.57052	1.47241	1.67517	13658	2.22e-17	1.4341	1.31946	1.55873	12723	0.0612	1.07765	0.996504	1.16543
DMcx	0	122250	1.21e-38	1.27008	1.22512	1.31671	52954	3.86e-13	1.4806	1.33176	1.64607	42915	2.04e-29	1.55817	1.44241	1.68321	13658	8.09e-11	1.35864	1.2387	1.49024	12723	0.0117	1.10511	1.02251	1.19437
NeuroOther	0	122250	5.3e-38	1.31014	1.25741	1.36506	52954	3.5e-09	1.60953	1.37438	1.88493	42915	7.64e-29	1.57707	1.45564	1.70863	13658	8.36e-15	1.45748	1.3252	1.60296	12723	7.26e-06	1.21089	1.11373	1.31649
E8770	0	122250	3.33e-35	1.1908	1.15833	1.22418	52954	2.27e-25	1.38739	1.30443	1.47563	42915	7.22e-24	1.32247	1.25247	1.39638	13658	4.41e-09	1.25435	1.1629	1.35298	12723	0.00306	1.11138	1.03637	1.1918
Mean_corpuscular_hemoglobin_concentration_.MCHC.__g_dl	0	49606	4.95e-35	0.638506	0.594613	0.685628	16846	0.00504	0.609607	0.431345	0.861522	18405	8.81e-20	0.536571	0.469255	0.613535	7206	1.61e-08	0.677406	0.591772	0.775425	7149	1.54e-09	0.725561	0.653831	0.805163
E876	0	122250	5.83e-34	1.26255	1.21595	1.31094	52954	8.67e-12	1.62907	1.41611	1.87408	42915	5.09e-24	1.49914	1.38594	1.62156	13658	1.88e-11	1.36328	1.24536	1.49232	12723	0.000973	1.14116	1.05506	1.2343
E870	0	122250	1.04e-33	1.17903	1.148	1.2109	52954	3.82e-11	1.26574	1.18033	1.35734	42915	5.7e-17	1.26652	1.19836	1.33856	13658	1.05e-12	1.30548	1.21316	1.40482	12723	5.57e-07	1.19123	1.11235	1.27572
Neutrophil.percent__.	0	45373	1.3e-33	1.59784	1.47953	1.72342	15078	5.82e-08	2.99264	2.01387	4.44684	16829	7.04e-31	2.43889	2.09587	2.83518	6697	2.14e-10	1.60318	1.38728	1.85617	6769	0.00833	1.16022	1.03778	1.29481
E860	0	122250	2.64e-32	1.22917	1.18788	1.27189	52954	8.28e-05	1.36747	1.17012	1.59808	42915	4.58e-17	1.35356	1.2612	1.45268	13658	1.45e-15	1.41011	1.29597	1.53429	12723	1.31e-06	1.20431	1.11697	1.29848
Cholesterol.HDL__mg_dl	1	31677	2.8e-32	0.600332	0.551659	0.653303	8951	0.000402	0.406406	0.246814	0.669193	14383	4.84e-24	0.407555	0.342483	0.484997	4860	2.07e-10	0.628566	0.544715	0.725326	3483	0.00907	0.800515	0.677314	0.946121
Creatinine__mg_dl	1	53226	1.12e-31	1.50746	1.40738	1.61467	16838	0.000313	2.06637	1.39249	3.06636	20911	2.5e-18	1.79518	1.57425	2.04711	7884	1.44e-07	1.4405	1.25732	1.65036	7593	1.88e-09	1.38209	1.24361	1.53596
COPD	0	122250	2.4e-30	1.22679	1.18459	1.2705	52954	1.06e-06	1.29577	1.16771	1.43789	42915	7.71e-19	1.42139	1.31504	1.53629	13658	1.51e-15	1.44758	1.32183	1.58536	12723	0.0126	1.10412	1.02149	1.19343
Coagulopathy	0	122250	3.63e-30	1.21673	1.17643	1.25842	52954	9.66e-10	1.48647	1.30911	1.68787	42915	2.51e-23	1.41719	1.32312	1.51793	13658	1.62e-07	1.26144	1.15647	1.37596	12723	5.08e-06	1.18652	1.10246	1.27698
Anemia	0	122250	1.29e-29	1.29654	1.23943	1.35628	52954	5.96e-14	2.09158	1.72515	2.53585	42915	1.48e-30	1.68313	1.54008	1.83943	13658	1.77e-12	1.42277	1.28992	1.56926	12723	0.226	1.05187	0.969223	1.14153
Neutrophil.absolute__x10.3_ul	1	45203	7.74e-29	1.53448	1.42313	1.65451	15009	7.33e-05	2.26288	1.51132	3.38818	16766	1.23e-13	1.75428	1.51208	2.0353	6681	1.96e-12	1.66703	1.44582	1.92201	6747	6.59e-05	1.25362	1.12186	1.40082
LiverSevere	0	122250	7.77e-27	1.17491	1.1408	1.21003	52954	3.25e-14	1.25034	1.18022	1.32462	42915	1.82e-12	1.22734	1.15937	1.29929	13658	7.29e-05	1.16533	1.08047	1.25683	12723	0.00196	1.10383	1.03691	1.17508
White_blood_cell_count_.WBC.__x10.3_ul	1	50568	8.81e-27	1.47611	1.37461	1.58512	17112	0.00218	1.81305	1.23919	2.65261	18813	1.83e-06	1.41394	1.22639	1.63018	7331	8.4e-13	1.64293	1.43397	1.8823	7312	5.51e-08	1.34251	1.20719	1.493
Alkaline_phosphatase.total_.ALP.__u_l	1	45297	2.67e-26	1.50539	1.39585	1.62356	14186	4.23e-09	3.10494	2.12762	4.53116	18086	8.84e-21	2.00758	1.73466	2.32343	6806	4.57e-10	1.57479	1.36523	1.81651	6219	0.0642	1.11201	0.993753	1.24433
DM	0	122250	3.05e-26	1.26335	1.20991	1.31919	52954	2.02e-12	1.73106	1.48559	2.01708	42915	2.33e-16	1.47476	1.34406	1.6182	13658	2.46e-07	1.29842	1.17581	1.43375	12723	0.0724	1.07597	0.993361	1.16544
MI	0	122250	2.49e-25	1.18867	1.15059	1.22801	52954	1.9e-05	1.23871	1.12294	1.36642	42915	7.75e-20	1.38288	1.2898	1.48271	13658	2.25e-09	1.30598	1.19652	1.42545	12723	0.000403	1.146	1.06267	1.23585
Lymphocyte.absolute__x10.3_ul	1	44870	5.79e-25	0.701567	0.655885	0.750423	14909	8.54e-09	0.457346	0.350419	0.596908	16654	9.27e-33	0.494018	0.439931	0.554752	6630	1.45e-06	0.72359	0.634358	0.825374	6677	0.317	0.946487	0.849861	1.05413
Hypotension	0	122250	8.47e-24	1.18204	1.14412	1.2212	52954	3.93e-09	1.40211	1.25289	1.56909	42915	3.92e-18	1.35412	1.26454	1.45004	13658	2.8e-12	1.3538	1.24354	1.47386	12723	0.00984	1.10604	1.02452	1.19396
WeightLoss	0	122250	1.88e-22	1.19043	1.14943	1.23291	52954	1.43e-05	1.38237	1.19432	1.60006	42915	1.45e-21	1.41047	1.31423	1.51374	13658	6.23e-06	1.2285	1.12356	1.34321	12723	0.000268	1.15525	1.06898	1.24846
E874	0	122250	3.88e-22	1.13092	1.10308	1.15946	52954	1.91e-12	1.19597	1.13785	1.25705	42915	1.4e-10	1.16745	1.11352	1.22399	13658	3.02e-05	1.15938	1.08156	1.24279	12723	0.00163	1.1068	1.03907	1.17894
Dementia	0	122250	8.84e-22	1.1688	1.13212	1.20665	52954	0.0168	1.11366	1.01959	1.21642	42915	2.8e-19	1.29471	1.22371	1.36982	13658	1.32e-20	1.49387	1.37278	1.62566	12723	9.11e-06	1.20501	1.10973	1.30844
Arrhythmia	0	122250	3.62e-21	1.25736	1.199	1.31856	52954	7.13e-09	1.7244	1.43385	2.07381	42915	2.02e-17	1.49379	1.36164	1.63873	13658	0.00014	1.21795	1.10043	1.34799	12723	0.00168	1.14451	1.05204	1.24506
E873	0	122250	2.94e-20	1.13537	1.10514	1.16642	52954	1.11e-11	1.24123	1.16619	1.32111	42915	5.18e-16	1.22813	1.1686	1.29068	13658	0.00711	1.1151	1.03006	1.20717	12723	0.00248	1.10632	1.03623	1.18117
INSURANCE_Uninsured	0	122250	2.21e-18	1.22723	1.17218	1.28485	52954	0.00115	1.34782	1.12587	1.61353	42915	8.7e-06	1.19813	1.10638	1.29749	13658	2.51e-06	1.18196	1.10248	1.26717	12723	1.85e-07	1.15476	1.09396	1.21894
Psychoses	0	122250	6.51e-17	1.18753	1.14058	1.23641	52954	0.000541	1.3699	1.14615	1.63731	42915	6.16e-07	1.23897	1.13889	1.34784	13658	2.4e-11	1.35002	1.23619	1.47429	12723	0.0812	1.07436	0.991145	1.16455
DBP__mm_Hg	0	66712	1.43e-16	0.710624	0.655307	0.770562	26870	0.151	1.31598	0.904364	1.91377	24392	8.42e-11	0.602797	0.517356	0.702318	8196	1.15e-08	0.659288	0.571366	0.760696	7254	0.000298	0.816551	0.731654	0.911405
PVD	0	122250	1.24e-15	1.16679	1.12351	1.21173	52954	0.00451	1.19428	1.05654	1.34997	42915	1.82e-15	1.37875	1.27381	1.49235	13658	1.08e-06	1.27184	1.15471	1.40084	12723	0.0986	1.07086	0.987312	1.16148
Valvular	0	122250	3.23e-15	1.16458	1.12127	1.20956	52954	2.33e-09	1.46575	1.29292	1.6617	42915	1.21e-11	1.3242	1.22093	1.43621	13658	0.00224	1.16396	1.05602	1.28295	12723	0.000372	1.156	1.06734	1.25207
Hemoglobin_A1C__.	1	27169	4.28e-15	1.48494	1.34529	1.63908	7336	0.000331	2.10925	1.40329	3.17043	12071	7.76e-09	1.66538	1.4006	1.9802	4499	1.14e-05	1.44553	1.22623	1.70408	3263	0.0767	1.14901	0.985209	1.34006
Carbon_dioxide.total_.CO2.__mmol_l	0	51259	5.43e-15	0.76313	0.713099	0.816672	15914	0.000183	0.499302	0.346999	0.718432	20286	0.00296	0.811297	0.706757	0.931261	7699	3.24e-07	0.701738	0.612581	0.803889	7360	5.79e-06	0.781864	0.702971	0.869635
IMM_58160084252	0	122250	8.91e-15	0.783547	0.736696	0.833382	52954	0.000342	0.574323	0.42397	0.778008	42915	5.71e-12	0.657988	0.584092	0.741235	13658	5.87e-07	0.752076	0.672527	0.841032	12723	0.62	0.980248	0.905958	1.06064
Cholesterol.total__mg_dl	0	31818	1.05e-14	0.641552	0.573258	0.717931	8999	0.448	0.814619	0.479731	1.38696	14444	2.48e-15	0.413238	0.332074	0.514402	4880	0.00216	0.717644	0.580412	0.887063	3495	0.0757	0.855703	0.720708	1.01664
Obesity	0	122250	2.61e-14	1.22133	1.16006	1.28586	52954	2.93e-05	1.63509	1.2983	2.05921	42915	0.000142	1.22155	1.10192	1.35421	13658	9.02e-05	1.22285	1.10566	1.3524	12723	0.05	1.08274	0.999992	1.17235
Pulmonary	0	122250	4.3e-14	1.20108	1.1453	1.25958	52954	0.0129	1.32933	1.06206	1.66379	42915	4.03e-09	1.34041	1.21578	1.47783	13658	1.19e-05	1.24973	1.13104	1.38081	12723	0.0957	1.07094	0.987982	1.16087
PULSE__bpm	1	64073	4.65e-14	1.36495	1.25892	1.47989	25702	1.93e-08	3.22508	2.14343	4.85256	23426	1.19e-07	1.49181	1.28649	1.72989	7905	0.000386	1.29553	1.12293	1.49466	7040	0.00681	1.16437	1.04285	1.30005
IMM_70461031903	0	122250	1.19e-13	0.815726	0.772984	0.86083	52954	0.468	0.907484	0.698148	1.17958	42915	3.09e-10	0.703407	0.63042	0.784851	13658	6.45e-07	0.764258	0.687479	0.849606	12723	0.0165	0.903426	0.831482	0.981597
Erythrocyte_sedimentation_rate_.ESR.__mm_hr	1	6360	1.2e-13	2.4245	1.91846	3.06361	1883	0.000496	7.67177	2.43741	24.1484	2632	1.7e-06	2.91949	1.88264	4.52767	1044	9.3e-05	2.37232	1.53824	3.65868	801	NA	NA	NA	NA
Stroke	0	122250	1.99e-13	1.14859	1.10695	1.19179	52954	1.19e-06	1.3331	1.18709	1.49708	42915	1.19e-15	1.37298	1.27045	1.48377	13658	0.00025	1.19663	1.08702	1.31734	12723	0.087	1.0722	0.989914	1.1613
Globulin__g_dl	1	20619	2.16e-13	1.52309	1.3612	1.70424	6081	1.85e-05	3.24995	1.89505	5.5736	8868	1.22e-16	2.65105	2.10475	3.33913	3102	0.00145	1.45777	1.15599	1.83836	2568	0.191	1.12411	0.943209	1.33971
Protein.total__g_dl	0	45641	5.45e-13	0.767623	0.714394	0.824809	14320	2.02e-07	0.422725	0.305518	0.584901	18211	1.89e-06	0.716445	0.624611	0.821789	6837	2.19e-07	0.689033	0.598488	0.793273	6273	0.0553	0.895516	0.79993	1.00255
African	0	122250	7.15e-13	1.35738	1.24872	1.47555	52954	0.355	1.14658	0.858328	1.53162	42915	0.00356	1.24333	1.07391	1.43943	13658	0.00219	1.28702	1.09519	1.51251	12723	7.99e-09	1.48046	1.2957	1.69158
PHTN	0	122250	7.94e-13	1.12368	1.0884	1.16012	52954	0.00793	1.17658	1.04348	1.32665	42915	2.12e-08	1.21413	1.13444	1.29943	13658	6.84e-06	1.20696	1.11197	1.31003	12723	0.0185	1.09211	1.01489	1.17524
E861	0	122250	1.4e-12	1.11037	1.07867	1.14301	52954	0.0207	1.12966	1.01882	1.25257	42915	5.01e-12	1.2235	1.15542	1.29559	13658	7.73e-05	1.17096	1.08283	1.26629	12723	0.0773	1.06684	0.992942	1.14622
IMM_ZOSTER	0	122250	1.66e-12	0.856058	0.819906	0.893803	52954	0.989	0.62815	0	NA	42915	2.64e-09	0.681744	0.600949	0.773395	13658	1.96e-09	0.688438	0.609413	0.777711	12723	0.0176	0.901805	0.828059	0.982116
Iron_binding_capacity.total_.TIBC.__ug_dl	0	7064	2.72e-12	0.52681	0.440381	0.630152	2096	4.67e-08	0.111399	0.0506672	0.244653	2536	4.34e-10	0.346853	0.248835	0.48368	1231	0.00167	0.595626	0.430824	0.822251	1201	0.575	0.930535	0.72363	1.18822
C.reactive_protein_.CRP.__mg_l	1	6659	4.26e-12	1.9502	1.61428	2.35609	2025	0.000999	4.43327	1.82622	10.7631	2618	7.03e-07	2.46562	1.72603	3.52199	1071	0.00191	1.77909	1.23638	2.55966	945	NA	NA	NA	NA
Glomerular_filtration_rate1.73_sq_M.predicted.black__NA	0	2239	5.9e-12	0.226802	0.14859	0.346081	519	NA	NA	NA	NA	993	NA	NA	NA	NA	371	NA	NA	NA	NA	356	NA	NA	NA	NA
E8779	0	122250	9.04e-12	1.09487	1.06672	1.12376	52954	2.57e-06	1.13576	1.07707	1.19764	42915	2.59e-05	1.1208	1.06281	1.18196	13658	0.000288	1.13236	1.05878	1.21107	12723	0.0299	1.07434	1.007	1.14618
Cholesterol.LDL__mg_dl	0	31695	3.29e-11	0.678914	0.605456	0.76149	8872	0.295	0.741736	0.424347	1.29475	14403	5.35e-13	0.445127	0.357308	0.554486	4905	0.00829	0.757314	0.616007	0.931033	3515	0.311	0.91724	0.776213	1.08284
Paralysis	0	122250	4.08e-11	1.11184	1.07739	1.14739	52954	0.000482	1.20144	1.0838	1.33184	42915	1.44e-15	1.27812	1.20338	1.35751	13658	0.0886	1.08108	0.988304	1.18257	12723	0.333	1.03746	0.963017	1.11766
Mets	0	122250	5.02e-11	1.11403	1.0787	1.1505	52954	0.0002	1.22606	1.10119	1.36509	42915	1.38e-13	1.27618	1.19634	1.36135	13658	8.68e-06	1.20505	1.10995	1.30828	12723	0.9	1.00507	0.929057	1.08731
Oxygen_saturation_.SpO2..pulse_oximetry__.	0	64154	7.99e-10	0.817912	0.767109	0.872052	24840	2.86e-10	0.433507	0.334334	0.562102	23469	0.0214	0.857246	0.751852	0.9774	8324	0.00018	0.783465	0.689557	0.890181	7521	0.0236	0.885897	0.797683	0.983847
HTN	0	122250	1.33e-09	1.2113	1.1385	1.2887	52954	2.5e-11	1.96503	1.61142	2.39624	42915	5.78e-06	1.29697	1.15909	1.45128	13658	0.0317	1.12856	1.01063	1.26017	12723	0.549	0.974022	0.893686	1.06159
Depression	0	122250	1.87e-09	1.15795	1.10384	1.21467	52954	0.0442	1.26933	1.00621	1.60128	42915	0.00186	1.17351	1.06104	1.29795	13658	7.45e-09	1.33832	1.21241	1.47732	12723	0.502	1.02904	0.946583	1.11869
Glomerular_filtration_rate1.73_sq_M.predicted__NA	0	6694	3.83e-09	0.384772	0.279992	0.52863	2234	0.000601	0.207306	0.0843984	0.509188	2955	7.75e-06	0.399912	0.267609	0.597521	912	NA	NA	NA	NA	593	NA	NA	NA	NA
Monocyte.absolute__x10.3_ul	1	44748	3.94e-09	1.2547	1.16342	1.35318	14815	0.0427	1.52082	1.01383	2.28139	16600	0.000158	1.3403	1.15133	1.56029	6642	5.39e-05	1.35052	1.16726	1.56258	6691	0.0759	1.10508	0.989623	1.23397
Triglycerides_.TG.__mg_dl	1	31566	4.78e-09	1.37835	1.238	1.53466	8853	0.000176	3.10269	1.7171	5.60645	14334	4.95e-06	1.58389	1.30016	1.92945	4888	0.00157	1.35157	1.12132	1.62916	3491	0.361	1.07728	0.91823	1.26389
LiverMild	0	122250	6.24e-09	1.13933	1.09031	1.19059	52954	1.22e-06	1.45434	1.25014	1.69192	42915	0.00345	1.1457	1.04589	1.25508	13658	0.00042	1.181	1.07669	1.29538	12723	0.762	1.01235	0.935009	1.09609
AST_ALT	1	122250	8.26e-09	1.14853	1.09567	1.20392	52954	0.255	1.1487	0.904776	1.45838	42915	2.92e-10	1.37091	1.2428	1.51221	13658	0.00285	1.16128	1.05262	1.28117	12723	0.0848	1.07321	0.990342	1.16298
IMM_00005197105	0	122250	9.39e-09	0.886153	0.850334	0.923483	52954	0.0168	1.28738	1.04666	1.58345	42915	0.118	0.929836	0.848708	1.01872	13658	3.87e-15	0.633034	0.564811	0.709499	12723	0.0116	0.897752	0.825607	0.976199
ELR	1	122250	1.16e-08	0.881967	0.844724	0.920849	52954	0.0346	0.795166	0.642854	0.98357	42915	5.81e-09	0.778863	0.716014	0.847232	13658	0.546	0.97075	0.881657	1.06884	12723	0.00146	0.885277	0.821279	0.954259
Ferritin__ng_ml	1	7593	1.21e-08	1.65568	1.39194	1.96901	2329	1.85e-09	7.08084	3.7401	13.4057	2804	1.97e-05	2.04298	1.47167	2.8359	1252	0.139	1.25395	0.929453	1.69185	1208	0.238	1.16223	0.905526	1.49172
Mean_corpuscular_hemoglobin_.MCH.__pg	0	49410	1.57e-08	0.813755	0.757646	0.874011	16737	0.677	0.924507	0.639001	1.3375	18348	7.78e-06	0.731095	0.637314	0.838684	7195	0.00157	0.802273	0.699833	0.919691	7130	0.0118	0.874242	0.787388	0.970677
PACK_YEARS__NA	1	9554	2.81e-08	1.84771	1.48765	2.29497	2117	0.0694	0.304237	0.0842201	1.09906	4375	0.000111	2.16264	1.46277	3.19756	1841	0.00851	1.58115	1.12389	2.22423	1221	0.00815	1.52846	1.11631	2.09278
Lymphoma	0	122250	1.62e-07	1.0837	1.05159	1.11679	52954	4.99e-06	1.19967	1.10948	1.2972	42915	2.51e-10	1.20221	1.13554	1.2728	13658	0.00269	1.133	1.04428	1.22926	12723	0.672	1.01708	0.940374	1.10005
E869	0	122250	2.72e-07	1.07813	1.04766	1.1095	52954	4.56e-08	1.23008	1.14208	1.32486	42915	7.01e-11	1.18202	1.12407	1.24295	13658	0.0662	1.08192	0.994756	1.17673	12723	0.454	1.0292	0.954538	1.10969
Asian	0	122250	2.98e-07	1.17425	1.10429	1.24866	52954	0.38	0.887047	0.67884	1.15912	42915	0.055	1.10924	0.997766	1.23317	13658	0.157	1.08043	0.970658	1.2026	12723	2.17e-11	1.30329	1.20604	1.4084
Bilirubin.direct__mg_dl	1	10110	3.58e-07	1.38127	1.21974	1.56418	2955	0.454	1.2477	0.698889	2.22744	3788	0.0287	1.30637	1.02831	1.65968	1734	0.000718	1.49581	1.18455	1.88886	1633	0.00223	1.36639	1.11861	1.66901
AlbuminGlobulin__calc	0	1709	3.96e-07	0.277963	0.169466	0.455919	483	NA	NA	NA	NA	796	NA	NA	NA	NA	256	NA	NA	NA	NA	174	NA	NA	NA	NA
Erythrocyte_distribution_width__fl	1	4902	4.06e-07	1.69285	1.38094	2.07522	1596	0.327	1.68648	0.592568	4.79982	1847	0.000255	1.94478	1.36163	2.77766	789	NA	NA	NA	NA	670	NA	NA	NA	NA
Troponin.I_.TNI.__ng_ml	1	8159	4.2e-07	1.34159	1.19722	1.5033	1472	0.0141	2.07146	1.15836	3.70443	2975	8.03e-07	1.7563	1.40424	2.19651	1615	0.00574	1.3844	1.09907	1.74382	2097	0.146	1.13587	0.956426	1.34906
Iron__ug_dl	1	7829	4.54e-07	0.681397	0.587048	0.790904	2344	0.193	0.654749	0.346025	1.2389	2841	2.35e-05	0.547685	0.41432	0.723981	1330	2.5e-05	0.553765	0.420696	0.728922	1314	0.624	0.942278	0.743077	1.19485
INSURANCE_Medicaid	0	122250	5.11e-07	1.18934	1.1115	1.2726	52954	0.00944	1.41684	1.08911	1.8432	42915	1.51e-06	1.27213	1.15328	1.40324	13658	0.0121	1.1304	1.02722	1.24392	12723	0.233	1.0514	0.968278	1.14164
Natriuretic_peptide.B_.BNP.__pg_ml	1	4425	6.36e-07	1.61792	1.33889	1.95514	540	NA	NA	NA	NA	1564	0.00104	1.80137	1.26714	2.56088	1013	0.0123	1.48538	1.08953	2.02498	1308	0.169	1.17512	0.93376	1.47885
Hypertension	0	122250	8.78e-07	1.17023	1.09916	1.24592	52954	1.13e-08	1.80473	1.47365	2.2102	42915	0.000446	1.22294	1.093	1.3683	13658	0.209	1.07323	0.961275	1.19824	12723	0.658	0.980516	0.898695	1.06976
INSURANCE_Medicare	0	122250	1.12e-06	1.15345	1.089	1.22166	52954	6.06e-12	1.48511	1.32683	1.66228	42915	4.49e-16	1.52117	1.37474	1.68315	13658	0.255	1.07942	0.946423	1.23107	12723	0.962	0.997394	0.896936	1.10907
Natriuretic_peptide.proBNP_.NT.proBNP.__pg_ml	1	2897	2.16e-06	1.76219	1.39392	2.22795	344	NA	NA	NA	NA	983	NA	NA	NA	NA	670	NA	NA	NA	NA	900	NA	NA	NA	NA
ALCOHOL__NA	0	39092	2.98e-06	0.768065	0.684773	0.845107	15900	0.17	0.669158	0.385056	1	14285	0.0576	0.810734	0.660453	1	4704	0.00762	0.760703	0.617764	0.922866	4203	0.000818	0.755225	0.639716	0.885298
INSURANCE_Commercial	0	122250	4.6e-06	0.819465	0.752565	0.892312	52954	0.143	0.789636	0.575582	1.08331	42915	9.2e-05	0.749227	0.648292	0.865869	13658	0.683	1.02596	0.907149	1.16032	12723	0.768	0.985283	0.892658	1.08752
Glomerular_filtration_rate1.73_sq_M.predicted__ml_min_1.73m2	0	6048	6.58e-06	0.468639	0.336976	0.6515	2012	0.949	1.04773	0.251252	4.37436	2655	4.39e-05	0.4246	0.281546	0.640487	848	NA	NA	NA	NA	533	NA	NA	NA	NA
Potassium_.K.__mmol_l	1	53811	1.65e-05	0.85899	0.801583	0.920508	16838	0.0233	1.53111	1.05961	2.21243	21235	0.0692	0.878518	0.763991	1.01022	8084	0.00225	0.813729	0.712915	0.928796	7654	0.000651	0.834852	0.75256	0.926139
IMM_00006489700	0	122250	1.91e-05	1.16072	1.08406	1.24279	52954	0.149	1.26621	0.918651	1.74525	42915	0.045	1.05134	1.00113	1.10407	13658	0.21	1.03458	0.981013	1.09108	12723	0.000124	1.07952	1.03816	1.12252
Sodium_.Na.__mmol_l	0	53717	2.45e-05	0.873986	0.820994	0.930426	16831	4.12e-05	0.51497	0.37499	0.707209	21181	6.56e-13	0.626324	0.551315	0.71154	8065	0.0543	0.87934	0.771428	1.00226	7640	0.0963	1.09262	0.984287	1.21299
IMM_49281054505	0	122250	4.4e-05	1.20364	1.10123	1.31558	52954	0.0159	1.40565	1.0657	1.85405	42915	0.0149	1.06818	1.01294	1.12644	13658	0.39	1.03513	0.956742	1.11995	12723	0.0158	1.06258	1.01145	1.11629
Osmolality__mOsm_kg	1	5102	5.32e-05	1.44841	1.2102	1.7335	1402	0.21	1.62557	0.760467	3.4748	2070	0.00511	1.63973	1.15994	2.31799	857	NA	NA	NA	NA	773	NA	NA	NA	NA
South_South_Atl_West_South_Crl	0	122250	5.55e-05	0.780369	0.691726	0.880371	52954	0.309	1.345	0.75996	2.38044	42915	0.722	1.04487	0.820479	1.33062	13658	0.0265	0.77918	0.625029	0.971343	12723	1.55e-08	0.586082	0.487021	0.705294
Vitamin_D._25.OH.total_.VIT_D.__ng_ml	1	13033	7.04e-05	0.730107	0.625206	0.852603	4078	0.0845	0.549492	0.27833	1.08478	5439	0.0402	0.72752	0.536886	0.985836	1918	0.00502	0.675408	0.513456	0.888449	1598	0.108	0.834041	0.668495	1.04058
Drugs	0	122250	8.19e-05	1.10729	1.05255	1.1649	52954	0.0787	1.17081	0.982072	1.39582	42915	0.107	1.06998	0.985528	1.16166	13658	0.0651	1.0865	0.994818	1.18664	12723	0.908	1.00476	0.926617	1.08951
Protein.urine.concentration__mg_dl	1	2032	9.06e-05	1.7334	1.31606	2.28325	644	NA	NA	NA	NA	683	NA	NA	NA	NA	392	NA	NA	NA	NA	313	NA	NA	NA	NA
BloodLoss	0	122250	9.85e-05	1.08515	1.04144	1.13071	52954	0.107	1.20086	0.961187	1.50029	42915	0.000177	1.155	1.0712	1.24535	13658	0.00029	1.17091	1.07512	1.27522	12723	0.666	1.01742	0.940642	1.10045
Aspartate_aminotransferase_.AST.__u_l	1	46162	0.000101	1.16106	1.07688	1.25187	14495	0.0773	1.41389	0.962838	2.07623	18431	0.203	1.09884	0.950297	1.2706	6911	6.86e-05	1.32838	1.15506	1.52772	6325	0.194	1.07757	0.962739	1.20612
Eosinophil.percent__.	1	43363	0.000105	0.868156	0.808279	0.932464	14303	0.6	1.11541	0.741913	1.67699	16126	0.000434	0.777701	0.676071	0.894611	6427	0.187	0.912562	0.796576	1.04544	6507	0.0104	0.872423	0.785971	0.968384
Estimated_average_glucose__mg_dl	1	2334	0.000138	1.81519	1.33585	2.46652	622	NA	NA	NA	NA	998	NA	NA	NA	NA	401	NA	NA	NA	NA	313	NA	NA	NA	NA
Urobilinogen.urine.dipstick__mg_dl	1	5531	0.00021	1.45399	1.19277	1.77229	1872	0.963	0.966265	0.22874	4.08181	1956	0.0586	1.46395	0.986249	2.17307	856	NA	NA	NA	NA	847	NA	NA	NA	NA
Albumin.urine.concentration__mg_dl	1	6159	0.000252	1.51449	1.21261	1.89141	1083	0.0316	3.80434	1.12469	12.8675	3191	0.0959	1.43676	0.937833	2.20117	1224	0.0067	1.67985	1.15465	2.44393	661	NA	NA	NA	NA
Troponin.T_.TNT.__ng_ml	1	2068	0.000284	1.47754	1.19674	1.82429	260	NA	NA	NA	NA	767	NA	NA	NA	NA	474	NA	NA	NA	NA	567	NA	NA	NA	NA
Pertussis	0	122250	0.000303	1.05309	1.02395	1.08306	52954	0.992	0.779393	0	NA	42915	0.0342	1.05581	1.00406	1.11022	13658	0.000818	1.07285	1.02956	1.11796	12723	NA	1	NA	NA
Glomerular_filtration_rate1.73_sq_M.predicted.non_black__ml_min_1.73m2	0	1829	0.00036	0.447608	0.287891	0.696209	234	NA	NA	NA	NA	794	NA	NA	NA	NA	417	NA	NA	NA	NA	384	NA	NA	NA	NA
Thyroxine.free_.FT4.__ng_dl	0	8760	0.000436	0.734277	0.618175	0.872181	2734	0.0722	0.438586	0.178574	1.07718	3488	0.0422	0.672973	0.459263	0.986135	1356	0.204	0.801736	0.570177	1.12732	1182	0.0237	0.734357	0.561938	0.959676
Glomerular_filtration_rate1.73_sq_M.predicted.black__ml_min_1.73m2	0	1586	0.000481	0.373303	0.214623	0.649268	232	NA	NA	NA	NA	730	NA	NA	NA	NA	340	NA	NA	NA	NA	284	NA	NA	NA	NA
HR__bpm	1	15552	0.000561	1.271	1.10913	1.45652	5547	0.0389	2.47507	1.04735	5.84905	5751	0.000509	1.5863	1.22291	2.05767	2145	0.108	1.22093	0.956924	1.55776	2109	0.388	1.08704	0.899554	1.3136
HT__cm	0	61694	0.000689	0.831922	0.748042	0.925227	24297	0.00253	0.475231	0.293215	0.770254	23083	2.65e-07	0.591364	0.484179	0.722278	7754	0.264	0.890657	0.726985	1.09212	6560	0.49	1.05798	0.901706	1.24115
Albumincreatinine_ratio.urine__mg_g	1	5329	0.000703	1.52836	1.19593	1.95322	928	NA	NA	NA	NA	2760	0.128	1.4504	0.898349	2.34174	1074	0.0433	1.50815	1.01254	2.24625	567	NA	NA	NA	NA
WT__kg	0	65427	0.00095	1.17062	1.06563	1.28261	26334	0.0142	1.60727	1.10249	2.35347	24035	0.108	1.13482	0.972831	1.32194	8067	0.0571	1.15445	0.995777	1.33772	6991	0.827	1.01393	0.895905	1.14573
Triiodothyronine.total_.T3.__ng_dl	0	1147	0.00106	0.376064	0.209364	0.675517	425	NA	NA	NA	NA	434	NA	NA	NA	NA	168	NA	NA	NA	NA	120	NA	NA	NA	NA
Midwest_East_North_Central	0	122250	0.00131	1.32626	1.11643	1.57551	52954	0.0371	2.38214	1.05346	5.38675	42915	0.00495	1.69958	1.1741	2.46027	13658	0.147	1.26813	0.920158	1.74772	12723	0.844	1.0266	0.790486	1.33327
Fibrin_D.Dimer__NA	1	1688	0.00148	1.76958	1.24488	2.51642	498	NA	NA	NA	NA	659	NA	NA	NA	NA	282	NA	NA	NA	NA	249	NA	NA	NA	NA
Herpes_Zoster	0	122250	0.0016	0.931355	0.891115	0.97341	52954	0.438	0.893146	0.67126	1.18838	42915	0.177	0.927858	0.832324	1.03436	13658	0.00813	0.851724	0.756274	0.959219	12723	0.0988	0.930991	0.855219	1.01347
BMI__NA	1	64941	0.00169	1.14888	1.05358	1.25283	26189	0.0267	1.61012	1.05648	2.45389	23871	0.00667	1.23631	1.06065	1.44106	7996	0.0582	1.15216	0.995111	1.334	6885	0.581	0.967802	0.861579	1.08713
Partial_thromboplastin_time_.PTT.__sec	1	9135	0.00178	1.17516	1.062	1.30038	1746	0.744	1.09381	0.638324	1.87433	3452	0.282	1.11939	0.911538	1.37464	1935	0.0171	1.26794	1.04315	1.54117	2002	0.0563	1.17534	0.995641	1.38748
Monocyte.percent__.	0	45076	0.00235	0.897144	0.836545	0.962121	14945	0.652	0.911105	0.608196	1.36462	16715	0.497	0.951646	0.824802	1.09781	6681	0.0533	0.870153	0.755645	1.00204	6735	0.0154	0.87514	0.785615	0.974864
Ethanol.concentration__mg_dl	1	1650	0.00258	0.501689	0.320351	0.785652	562	NA	NA	NA	NA	651	NA	NA	NA	NA	261	NA	NA	NA	NA	176	NA	NA	NA	NA
Creatinine.urine.concentration__mg_dl	1	10377	0.0029	0.799906	0.690608	0.926512	2402	0.062	0.519526	0.261151	1.03355	4780	0.00131	0.662607	0.515518	0.851664	1963	0.701	1.0509	0.815806	1.35373	1232	0.0994	0.816437	0.641453	1.03919
Caucasian	0	122250	0.00388	1.14312	1.0439	1.25179	52954	0.00528	0.620272	0.443441	0.867613	42915	0.788	0.978775	0.837184	1.14429	13658	0.156	1.13142	0.953915	1.34194	12723	4.72e-07	1.46865	1.26469	1.70555
IMM_00006494300	0	122250	0.00482	0.94006	0.900513	0.981339	52954	0.027	1.20321	1.0212	1.41762	42915	0.904	0.994083	0.902994	1.09438	13658	3.78e-08	0.737238	0.661356	0.821823	12723	0.0777	0.928682	0.855402	1.00827
Cholesterol.totalHDL_ratio__no_units	1	23392	0.00518	1.20296	1.05678	1.36938	6702	0.169	1.6854	0.801263	3.54512	10550	0.00507	1.42539	1.11242	1.82639	3558	0.272	1.14142	0.901556	1.44509	2582	0.508	1.06682	0.880971	1.29189
Procalcitonin_.PCT.__ng_ml	1	2481	0.00739	1.28947	1.0706	1.55312	344	NA	NA	NA	NA	874	NA	NA	NA	NA	625	NA	NA	NA	NA	638	NA	NA	NA	NA
Testosterone.total__ng_dl	0	1496	0.00765	0.23979	0.0839496	0.683643	656	NA	NA	NA	NA	639	NA	NA	NA	NA	145	NA	NA	NA	NA	56	NA	NA	NA	NA
Prothrombin_time_.PT.__sec	1	12448	0.00788	1.13129	1.03292	1.23906	2390	0.0381	1.48668	1.02207	2.16251	4613	0.00384	1.29832	1.08767	1.54973	2599	0.181	1.13348	0.94329	1.362	2846	0.557	1.04674	0.898837	1.21895
West_Mountain	0	122250	0.00792	0.89428	0.823485	0.97116	52954	0.713	1.07217	0.739117	1.55531	42915	0.746	0.973201	0.825712	1.14704	13658	0.146	0.893551	0.76774	1.03997	12723	0.00251	0.819483	0.720222	0.932429
Platelet_count_.PLT.__x10.3_ul	0	50511	0.0082	0.90271	0.836693	0.973838	17102	0.0215	0.628394	0.423184	0.933372	18772	0.00575	0.809951	0.697527	0.940446	7324	0.67	0.969542	0.841524	1.12396	7313	0.465	0.960359	0.861411	1.07356
Parathyroid_hormone_.PTH.__pg_ml	1	2659	0.00931	1.38474	1.08342	1.76983	414	NA	NA	NA	NA	1081	0.115	1.47871	0.908629	2.40659	657	NA	NA	NA	NA	507	NA	NA	NA	NA
Cancer	0	122250	0.00935	1.05253	1.01265	1.09397	52954	3.76e-06	1.41023	1.21902	1.63144	42915	0.000346	1.17194	1.07436	1.27835	13658	0.197	1.06613	0.967383	1.17494	12723	0.666	0.982536	0.907034	1.06434
Cholesterol.in_VLDL__mg_dl	1	4665	0.0127	1.66591	1.1151	2.48877	1472	0.122	4.5999	0.663774	31.8769	2166	0.0186	2.56919	1.17069	5.63848	650	NA	NA	NA	NA	377	NA	NA	NA	NA
Transferrin_saturation__.	1	6870	0.0149	0.815058	0.691315	0.960949	2050	0.23	1.54699	0.758182	3.15641	2475	0.0414	0.72281	0.529124	0.987394	1197	0.0126	0.685881	0.510019	0.922383	1148	0.431	0.901383	0.696229	1.16693
Chloride_.Cl.__mmol_l	0	53593	0.0174	1.08059	1.01362	1.15157	16784	0.323	0.841788	0.598317	1.18406	21120	0.00228	0.81588	0.715908	0.929777	8052	0.00306	1.22807	1.07174	1.40638	7637	1.9e-05	1.25887	1.13322	1.3992
Self_Monitored_Blood_Glucose_.SMBG.__NA	0	1370	0.0175	1.70393	1.0979	2.64429	325	NA	NA	NA	NA	652	NA	NA	NA	NA	261	NA	NA	NA	NA	132	NA	NA	NA	NA
Granulocytes.immature100_leukocytes__.	1	1965	0.0187	1.40061	1.05776	1.85456	483	NA	NA	NA	NA	728	NA	NA	NA	NA	378	NA	NA	NA	NA	376	NA	NA	NA	NA
Oxygen_saturation_.SO2..other.performed__.	0	4205	0.0202	1.21564	1.0291	1.43637	873	NA	NA	NA	NA	1659	0.165	1.24577	0.91355	1.70116	871	NA	NA	NA	NA	802	NA	NA	NA	NA
Granulocytes.immature__x10.3_ul	0	1631	0.0209	1.37236	1.04901	1.79537	428	NA	NA	NA	NA	588	NA	NA	NA	NA	303	NA	NA	NA	NA	312	NA	NA	NA	NA
Basophil.absolute__x10.3_ul	1	33620	0.0235	1.09999	1.01289	1.19458	10505	0.0628	1.56198	0.976441	2.49862	12727	0.888	1.01185	0.858298	1.19294	5150	0.00443	1.26644	1.07633	1.49014	5238	0.861	1.01115	0.893147	1.14469
UROUT__ml	0	9340	0.0247	0.860177	0.752812	0.980746	2027	0.0244	0.43773	0.213048	0.898731	3324	0.963	1.00577	0.786838	1.27073	1842	0.186	0.853293	0.674672	1.07412	2147	0.0643	0.846678	0.710252	1
Alcohol	0	122250	0.0248	1.05304	1.00655	1.10168	52954	0.0434	1.1751	1.00481	1.37424	42915	0.0066	1.11658	1.03117	1.20905	13658	0.613	1.02379	0.93468	1.1214	12723	0.101	0.932935	0.858718	1.01356
Metamyelocyte.percent__.	1	1579	0.0261	0.731359	0.555179	0.963454	325	NA	NA	NA	NA	610	NA	NA	NA	NA	316	NA	NA	NA	NA	328	NA	NA	NA	NA
Reticulocyte.percent__.	1	1470	0.0265	1.38326	1.03858	1.84239	325	NA	NA	NA	NA	503	NA	NA	NA	NA	325	NA	NA	NA	NA	317	NA	NA	NA	NA
Lactic_acid__mmol_l	1	8392	0.0319	1.1356	1.01108	1.27546	1636	0.0034	2.58195	1.36856	4.87108	3029	0.413	1.09779	0.877874	1.37281	1761	0.15	1.17188	0.944476	1.454	1966	0.247	1.10861	0.93111	1.31996
LVEF__.	0	7948	0.0443	0.878909	0.774979	0.996668	871	NA	NA	NA	NA	3172	0.823	0.970859	0.748859	1.25718	1871	0.158	0.837623	0.654955	1.07158	2034	0.238	0.895049	0.74444	1.07725
Anion_gap__mmol_l	0	40495	0.0459	1.08702	1.0013	1.17968	12393	0.0318	1.59371	1.04107	2.43933	15355	0.134	1.12849	0.963339	1.32225	6262	0.801	0.980581	0.842128	1.14176	6485	0.283	1.06817	0.947029	1.20455
Protein.urine.dipstick__mg_dl	1	4783	0.0476	1.17433	1.00174	1.37671	1380	0.0189	2.54919	1.16732	5.56715	1452	0.094	1.34412	0.950858	1.89998	879	NA	NA	NA	NA	1072	0.666	1.05671	0.82251	1.35755
Northeast_New_England	0	122250	0.0536	1.13651	0.998016	1.29421	52954	0.0941	1.71577	0.911864	3.2284	42915	0.0387	1.33243	1.01505	1.74901	13658	0.127	1.19632	0.950524	1.50567	12723	0.325	0.893683	0.714505	1.11776
Immunoglobulin_M_.IgM..quantitative__mg_dl	1	1022	0.0555	0.727144	0.524772	1.00756	210	NA	NA	NA	NA	428	NA	NA	NA	NA	220	NA	NA	NA	NA	164	NA	NA	NA	NA
Phosphorus_.PO4.__mg_dl	1	9158	0.0621	1.1131	0.99459	1.24573	1517	0.000593	2.67426	1.5255	4.68797	3538	0.0634	1.21455	0.989207	1.49122	2046	0.482	0.931233	0.763322	1.1361	2057	0.581	1.04871	0.88568	1.24176
Oxygen_saturation_.SO2..other.performed__mm_Hg	1	3742	0.0622	1.17961	0.991599	1.40326	811	NA	NA	NA	NA	1475	0.369	1.15834	0.840549	1.59627	749	NA	NA	NA	NA	707	NA	NA	NA	NA
Glucose.urine.dipstick__mg_dl	1	1484	0.0625	1.33415	0.98505	1.807	375	NA	NA	NA	NA	588	NA	NA	NA	NA	290	NA	NA	NA	NA	231	NA	NA	NA	NA
Hepatitis_C_antibody_sco_ratio_.HCV..quantitative__no_units	1	1190	0.0631	1.82404	0.967643	3.43835	534	NA	NA	NA	NA	509	NA	NA	NA	NA	116	NA	NA	NA	NA	31	NA	NA	NA	NA
Vancomycin.trough__ug_ml	0	1380	0.0678	1.27281	0.982547	1.64921	219	NA	NA	NA	NA	586	NA	NA	NA	NA	330	NA	NA	NA	NA	245	NA	NA	NA	NA
Gamma.glutamyl_transferase_.GGT.__u_l	1	1574	0.0699	1.34773	0.976009	1.86092	538	NA	NA	NA	NA	656	NA	NA	NA	NA	200	NA	NA	NA	NA	180	NA	NA	NA	NA
Triiodothyronine.free_.FT3.__pg_ml	0	1772	0.0755	0.658284	0.41514	1.04383	564	NA	NA	NA	NA	752	NA	NA	NA	NA	269	NA	NA	NA	NA	187	NA	NA	NA	NA
Sodium_.Na..urine.concentration__mmol_l	1	1507	0.0768	0.806288	0.635201	1.02353	168	NA	NA	NA	NA	616	NA	NA	NA	NA	373	NA	NA	NA	NA	350	NA	NA	NA	NA
Carbon_dioxide__mm_Hg	1	1180	0.0788	0.757377	0.555557	1.03251	251	NA	NA	NA	NA	453	NA	NA	NA	NA	224	NA	NA	NA	NA	252	NA	NA	NA	NA
Epithelial_cells.urine.microscopic__NA	1	1161	0.0812	1.50808	0.95027	2.39338	311	NA	NA	NA	NA	364	NA	NA	NA	NA	181	NA	NA	NA	NA	305	NA	NA	NA	NA
Human_chorionic_gonadotropin_.HCG..quantitative__u_l	1	1912	0.0902	0.0981339	0.00669418	1.43878	1746	0.218	0.186723	0.0129168	2.69933	152	NA	NA	NA	NA	9	NA	NA	NA	NA	5	NA	NA	NA	NA
Red_blood_cells_.RBC..urine.microscopic__NA	1	1399	0.0939	1.29525	0.956965	1.75317	365	NA	NA	NA	NA	441	NA	NA	NA	NA	236	NA	NA	NA	NA	357	NA	NA	NA	NA
Magnesium_.Mg.__mg_dl	0	13910	0.104	1.08024	0.984207	1.18566	2651	0.288	1.3029	0.799363	2.12362	5244	0.108	1.16036	0.968095	1.39084	2860	0.245	0.899216	0.751687	1.07569	3155	0.0414	1.16231	1.00585	1.34308
Acetaminophen__ug_ml	1	1037	0.107	0.645955	0.379662	1.09905	432	NA	NA	NA	NA	398	NA	NA	NA	NA	126	NA	NA	NA	NA	81	NA	NA	NA	NA
Bands.percent__.	1	2881	0.12	1.15597	0.962965	1.38771	614	NA	NA	NA	NA	1064	0.398	1.15346	0.828102	1.60655	566	NA	NA	NA	NA	637	NA	NA	NA	NA
pH__no_units	0	1103	0.123	1.27247	0.936454	1.72906	244	NA	NA	NA	NA	411	NA	NA	NA	NA	207	NA	NA	NA	NA	241	NA	NA	NA	NA
Hypothyroid	0	122250	0.124	1.03495	0.990655	1.08121	52954	7.17e-08	1.58998	1.34314	1.88222	42915	0.0103	1.14107	1.03168	1.26208	13658	0.417	1.04404	0.940823	1.15858	12723	0.23	0.94957	0.872679	1.03323
Transferrin.direct__mg_dl	0	1649	0.129	0.768892	0.547826	1.07427	455	NA	NA	NA	NA	573	NA	NA	NA	NA	282	NA	NA	NA	NA	339	NA	NA	NA	NA
Ketones.urine.dipstick__mg_dl	1	1501	0.134	0.769155	0.545532	1.08437	631	NA	NA	NA	NA	415	NA	NA	NA	NA	230	NA	NA	NA	NA	225	NA	NA	NA	NA
Immunoglobulin_A_.IgA..quantitative__mg_dl	0	1599	0.137	0.783713	0.568422	1.08521	521	NA	NA	NA	NA	618	NA	NA	NA	NA	270	NA	NA	NA	NA	190	NA	NA	NA	NA
Cholesterol.non.HDL__mg_dl	1	15193	0.14	0.89373	0.76992	1.03745	4350	0.98	1.01042	0.444195	2.29842	6836	0.000279	0.61401	0.471978	0.79878	2334	0.618	1.07568	0.807769	1.43241	1673	0.349	1.12289	0.880949	1.4313
PUD	0	122250	0.143	1.02861	0.990517	1.06817	52954	0.00437	1.2102	1.06139	1.37989	42915	0.156	1.06297	0.976971	1.15654	13658	0.384	1.0429	0.948759	1.14639	12723	0.514	0.973647	0.898644	1.05491
Rheumatoid_factor_.RF..quantitative__u_ml	1	1478	0.144	1.44197	0.882746	2.35543	563	NA	NA	NA	NA	639	NA	NA	NA	NA	185	NA	NA	NA	NA	91	NA	NA	NA	NA
Thyroxine.total_.T4.__ug_dl	0	1611	0.153	0.660807	0.374624	1.16551	479	NA	NA	NA	NA	652	NA	NA	NA	NA	275	NA	NA	NA	NA	205	NA	NA	NA	NA
PH.arterial_blood__no_units	0	2682	0.156	0.87631	0.730312	1.0515	395	NA	NA	NA	NA	1111	0.285	0.837367	0.604824	1.15932	647	NA	NA	NA	NA	529	NA	NA	NA	NA
Immunoglobulin_G_.IgG..quantitative__mg_dl	1	1228	0.165	0.821129	0.621762	1.08438	289	NA	NA	NA	NA	506	NA	NA	NA	NA	249	NA	NA	NA	NA	184	NA	NA	NA	NA
FEV1_FVC_RATIO__.	0	1004	0.178	0.732041	0.465193	1.15171	140	NA	NA	NA	NA	474	NA	NA	NA	NA	256	NA	NA	NA	NA	134	NA	NA	NA	NA
Uric_acid__mg_dl	1	3859	0.184	1.17534	0.925847	1.49207	913	NA	NA	NA	NA	1641	0.467	0.848083	0.543852	1.32248	727	NA	NA	NA	NA	578	NA	NA	NA	NA
Platelet_mean_volume_.MPV.__fl	0	36567	0.189	0.945344	0.869223	1.02804	12665	0.826	1.05565	0.65142	1.71081	13091	0.0085	0.792882	0.66703	0.942503	5292	0.542	0.94917	0.802794	1.12232	5519	0.737	1.02176	0.900993	1.15872
Midwest_West_North_Central	0	122250	0.194	0.923297	0.818626	1.04132	52954	0.0176	1.99354	1.12784	3.52364	42915	0.174	1.18553	0.927625	1.51515	13658	0.635	0.951249	0.774053	1.16901	12723	0.000109	0.6956	0.578791	0.835983
Oxygen_saturation_.SO2..arterial_blood__.	0	2239	0.231	0.88708	0.729153	1.07918	304	NA	NA	NA	NA	960	NA	NA	NA	NA	529	NA	NA	NA	NA	446	NA	NA	NA	NA
Basophil.percent__.	0	40458	0.25	0.955943	0.885235	1.03232	13109	0.276	1.24076	0.841943	1.82847	15209	0.0119	0.815296	0.69531	0.955984	6059	0.816	0.982758	0.848921	1.13769	6081	0.845	1.01143	0.902858	1.13308
Casts.urine.microscopic___lpf	1	1847	0.25	0.857477	0.659871	1.11418	441	NA	NA	NA	NA	612	NA	NA	NA	NA	371	NA	NA	NA	NA	423	NA	NA	NA	NA
Rheumatic	0	122250	0.253	1.0247	0.982677	1.06852	52954	0.0199	1.19656	1.02874	1.39177	42915	0.0837	1.08702	0.988954	1.1948	13658	0.0528	0.891721	0.794067	1.00138	12723	0.364	1.03749	0.958258	1.12328
Lymphocyte.atypical.percent__.	1	1296	0.267	0.842056	0.621672	1.1406	303	NA	NA	NA	NA	486	NA	NA	NA	NA	233	NA	NA	NA	NA	274	NA	NA	NA	NA
Rubella.performed__other_unit	1	1175	0.268	0.392408	0.0750491	2.05192	882	NA	NA	NA	NA	249	NA	NA	NA	NA	33	NA	NA	NA	NA	11	NA	NA	NA	NA
Prothrombin.INR__no_units	1	13421	0.28	1.05013	0.960941	1.14762	2503	0.0989	1.37772	0.941625	2.01578	4955	0.00445	1.28051	1.07989	1.5184	2812	0.963	1.00433	0.838308	1.20324	3151	0.581	0.959315	0.827723	1.11182
PH.urine.dipstick__no_units	1	30296	0.283	1.0476	0.962401	1.14033	10474	0.732	1.0858	0.677828	1.73933	10551	0.809	1.02244	0.853737	1.22447	4413	0.812	1.01998	0.86688	1.2001	4858	0.475	1.04564	0.925045	1.18197
Red_blood_cells_.RBC..urine.microscopic___hpf	1	6593	0.288	1.09007	0.929859	1.27794	2109	0.88	1.07755	0.409943	2.83243	2220	0.407	1.15417	0.822634	1.61925	1040	0.624	1.08365	0.786172	1.49371	1224	0.525	1.0799	0.852214	1.36837
Glucose.fasting__mg_dl	1	2514	0.29	1.22852	0.839091	1.79869	933	NA	NA	NA	NA	1051	0.673	1.17953	0.547972	2.53899	315	NA	NA	NA	NA	215	NA	NA	NA	NA
Epithelial_cells.urine.microscopic___hpf	1	4127	0.294	0.873367	0.678294	1.12455	1447	0.536	0.664162	0.181913	2.42491	1343	0.127	0.630309	0.348149	1.1411	618	NA	NA	NA	NA	719	NA	NA	NA	NA
Varicella	0	122250	0.304	0.959448	0.886569	1.03832	52954	0.992	0.373823	0	NA	42915	0.991	1.00058	0.907641	1.10303	13658	0.976	0.51544	0	NA	12723	0.541	0.964693	0.859663	1.08256
White_blood_cells_.WBC..urine.microscopic__NA	1	1467	0.33	1.17285	0.85082	1.61692	378	NA	NA	NA	NA	465	NA	NA	NA	NA	260	NA	NA	NA	NA	364	NA	NA	NA	NA
Blood_urea_nitrogencreatinine_ratio_.BUNCREA.__no_units	0	15513	0.344	1.06021	0.939229	1.19681	4543	0.572	0.818141	0.407946	1.64083	6145	0.531	0.925359	0.726071	1.17882	2528	0.225	1.1657	0.910071	1.49286	2297	0.133	1.15849	0.956113	1.403
Carbon_dioxide.partial_pressure_.PCO2..arterial_blood__mm_Hg	1	2632	0.345	1.09683	0.905219	1.329	394	NA	NA	NA	NA	1097	0.184	1.26617	0.893777	1.7937	629	NA	NA	NA	NA	512	NA	NA	NA	NA
Specific_gravity.urine.dipstick__no_units	1	29803	0.366	0.956798	0.869433	1.05294	10382	0.453	0.832347	0.515357	1.34431	10360	0.431	0.928075	0.77079	1.11746	4309	0.0862	0.860025	0.723945	1.02168	4752	0.288	1.06903	0.945276	1.20899
Lactate_dehydrogenase.total_.LDH.__u_l	1	3116	0.387	1.09368	0.892756	1.33982	855	NA	NA	NA	NA	1175	0.728	1.06518	0.745892	1.52113	573	NA	NA	NA	NA	513	NA	NA	NA	NA
Asthma	0	122250	0.399	1.02289	0.970437	1.07821	52954	0.000328	1.42008	1.17274	1.71955	42915	0.192	1.06934	0.966926	1.1826	13658	0.134	0.920648	0.826286	1.0258	12723	0.776	0.988279	0.911146	1.07195
Alanine_aminotransferase_.ALT.__u_l	1	46339	0.403	0.966658	0.892791	1.04659	14498	0.881	1.03303	0.673933	1.58351	18536	0.00104	0.775074	0.665617	0.902533	6948	0.428	1.0589	0.91925	1.21981	6357	0.486	1.0409	0.929885	1.16515
Hispanic	0	122250	0.406	1.03476	0.954641	1.12157	52954	0.0103	0.653669	0.47233	0.904622	42915	0.621	1.03108	0.913342	1.16397	13658	0.326	1.05744	0.94585	1.18222	12723	0.0963	1.08076	0.986234	1.18434
Oxygen.partial_pressure_.PO2..arterial_blood__mm_Hg	1	2551	0.411	0.917808	0.747973	1.12616	373	NA	NA	NA	NA	1059	0.31	0.828717	0.576467	1.19134	613	NA	NA	NA	NA	506	NA	NA	NA	NA
Amylase.total__u_l	1	1471	0.416	1.16053	0.810466	1.66178	482	NA	NA	NA	NA	564	NA	NA	NA	NA	218	NA	NA	NA	NA	207	NA	NA	NA	NA
Creatine_kinase.total_.CK.__u_l	1	4995	0.427	1.06814	0.907937	1.25655	966	NA	NA	NA	NA	1987	0.852	0.970291	0.707181	1.33123	1052	0.217	1.21469	0.892293	1.6536	990	NA	NA	NA	NA
ABO_A	0	16593	0.501	0.966596	0.875526	1.06718	6155	0.677	0.903648	0.561143	1.4552	5243	0.764	0.97227	0.809315	1.16803	2660	0.471	0.934274	0.77649	1.12411	2535	0.999	1.00006	0.847637	1.17988
Ammonia_.NH3.__umol_l	1	1429	0.504	1.09555	0.83836	1.43158	195	NA	NA	NA	NA	591	NA	NA	NA	NA	360	NA	NA	NA	NA	283	NA	NA	NA	NA
Folate__ng_ml	1	5204	0.511	0.941565	0.786683	1.12692	1309	0.0948	0.409333	0.143511	1.16752	1906	0.839	0.961524	0.659299	1.40226	969	NA	NA	NA	NA	1020	0.63	0.9368	0.718027	1.22219
Prostate_specific_antigen.total_.PSA.__ng_ml	1	5984	0.516	0.939911	0.779602	1.1333	529	NA	NA	NA	NA	3804	0.248	0.815026	0.576176	1.15289	1204	0.132	0.759735	0.531118	1.08678	447	NA	NA	NA	NA
ESTIMATED_AVERAGE_GLUCOSE__mg_dl	1	1976	0.556	0.89502	0.618906	1.29431	532	NA	NA	NA	NA	924	NA	NA	NA	NA	324	NA	NA	NA	NA	196	NA	NA	NA	NA
PAIN__out_of_10	0	33513	0.59	0.971996	0.876666	1.0778	12483	0.625	0.88764	0.550419	1.43114	12494	0.452	0.930469	0.771062	1.12318	4596	0.857	1.0162	0.853738	1.20981	3940	0.572	0.958426	0.827167	1.11032
Mean_corpuscular_volume_.MCV.__fl	0	50454	0.591	0.980525	0.912713	1.05393	17059	0.141	1.32652	0.910914	1.93266	18761	0.558	0.958824	0.832976	1.10416	7328	0.504	0.954306	0.831961	1.0943	7306	0.748	0.983111	0.885882	1.09152
HIV	0	122250	0.613	1.01382	0.961242	1.06928	52954	0.111	1.09212	0.98001	1.21705	42915	0.661	0.978426	0.887604	1.07853	13658	0.661	0.975797	0.874654	1.08863	12723	0.798	1.00968	0.937873	1.08699
SBP__mm_Hg	1	66718	0.615	1.01969	0.945156	1.1001	26875	0.00433	1.71256	1.18346	2.47822	24391	0.373	1.06918	0.922957	1.23856	8198	0.728	1.02537	0.89036	1.18086	7254	0.186	0.929559	0.834172	1.03586
Vitamin_B12__pg_ml	1	9614	0.623	1.03467	0.903128	1.18536	2552	0.00565	2.91144	1.36584	6.206	3609	0.089	1.30144	0.960617	1.76313	1690	0.0899	1.28328	0.96186	1.71211	1763	0.0205	0.793354	0.652305	0.964895
White_blood_cells_.WBC..urine.microscopic___hpf	1	7491	0.653	0.965196	0.827033	1.12656	2407	0.525	1.29679	0.581524	2.89179	2531	0.649	1.08489	0.764235	1.54015	1192	0.929	1.01469	0.735763	1.39931	1361	0.17	0.850418	0.674818	1.07174
Myelocyte.percent__.	1	1319	0.659	1.06695	0.799999	1.42305	260	NA	NA	NA	NA	520	NA	NA	NA	NA	278	NA	NA	NA	NA	261	NA	NA	NA	NA
South_East_South_Central	0	122250	0.669	1.01559	0.945997	1.09031	52954	0.5	0.254639	0.00477665	13.5746	42915	0.00926	1.19924	1.04586	1.37509	13658	0.706	1.02609	0.897782	1.17272	12723	0.0422	0.887622	0.791176	0.995827
Bicarbonate_.HCO3..arterial_blood__mmol_l	0	2898	0.702	1.03588	0.864731	1.2404	421	NA	NA	NA	NA	1216	0.209	1.23409	0.889055	1.71327	676	NA	NA	NA	NA	585	NA	NA	NA	NA
West_Pacific	0	122250	0.715	0.973549	0.842976	1.12435	52954	0.713	0.863175	0.393543	1.89322	42915	0.184	0.846109	0.661155	1.0828	13658	0.146	1.16109	0.949307	1.42012	12723	0.00251	1.27942	1.09046	1.50112
Thyroid_stimulating_hormone_.TSH.__uu_ml	1	27817	0.716	0.982386	0.892681	1.08116	9003	0.357	1.31555	0.734117	2.35747	10899	0.265	1.1364	0.907456	1.42319	4006	0.899	0.98742	0.81148	1.20152	3909	0.214	0.913735	0.792463	1.05353
Lipase__u_l	1	8517	0.741	1.02577	0.882227	1.19259	3078	0.244	1.46221	0.771677	2.77071	2989	0.773	0.959176	0.723022	1.27251	1226	0.969	1.00583	0.752673	1.34421	1224	0.803	1.03276	0.801565	1.33053
Bilirubin.total__mg_dl	1	45332	0.753	0.987366	0.912257	1.0687	14217	0.00935	0.571131	0.374359	0.871333	18095	0.0985	0.879242	0.754739	1.02432	6798	0.438	1.05974	0.915235	1.2271	6222	0.194	1.07963	0.961728	1.21201
Hepatitis_B_surface_antibody_.HBsAb.__mu_ml	1	1400	0.773	1.07298	0.664627	1.73212	734	NA	NA	NA	NA	474	NA	NA	NA	NA	134	NA	NA	NA	NA	58	NA	NA	NA	NA
Calcium.ionized__mg_dl	0	3659	0.794	0.975545	0.81028	1.17451	780	NA	NA	NA	NA	1407	0.988	0.997454	0.713719	1.39396	769	NA	NA	NA	NA	703	NA	NA	NA	NA
Northeast_Middle_Atlantic	0	122250	0.807	0.978409	0.821162	1.16576	52954	0.0302	2.46473	1.0902	5.57205	42915	0.0535	1.4555	0.994421	2.13034	13658	0.514	0.899258	0.653619	1.23721	12723	0.00293	0.674401	0.520244	0.87424
Eosinophil.absolute__x10.3_ul	1	41886	0.872	0.993898	0.922807	1.07051	13607	0.636	1.10101	0.73924	1.63975	15685	0.00397	0.806921	0.697333	0.933729	6266	0.00774	1.21655	1.05316	1.40527	6328	0.473	0.96098	0.861929	1.07142
Base_excessdeficit.arterial_blood__mmol_l	1	2273	0.883	0.985209	0.808057	1.20124	309	NA	NA	NA	NA	956	NA	NA	NA	NA	527	NA	NA	NA	NA	481	NA	NA	NA	NA
Bicarbonate_.HCO3.__mmol_l	0	6260	0.883	0.988666	0.849619	1.15005	1708	0.00981	0.443587	0.239357	0.822087	2360	0.671	0.939883	0.706045	1.25079	1160	0.881	1.02375	0.753707	1.39068	1032	0.58	1.0755	0.831371	1.3914
TEMP__deg_c	1	57223	0.938	0.996651	0.915994	1.08441	23358	0.261	0.790356	0.524311	1.1914	20510	0.924	0.99238	0.848175	1.1611	6967	0.309	1.0809	0.930388	1.25576	6388	0.794	0.985136	0.880612	1.10207
Reticulocyte.absolute__x10.3_ul	0	1052	0.98	1.0047	0.69839	1.44572	270	NA	NA	NA	NA	354	NA	NA	NA	NA	218	NA	NA	NA	NA	210	NA	NA	NA	NA

## Sheet: back_up
		all patients										age <=50										age 50 to 70										age 70 to 80										age 80 to 90
variable	Transformation	N	OR	LCL	UCL	P	mean	sd	OR_2SD	LCL_2D	UCL_2D	N	OR	LCL	UCL	P	mean	sd	OR_2SD	LCL_2D	UCL_2D	N	OR	LCL	UCL	P	mean	sd	OR_2SD	LCL_2D	UCL_2D	N	OR	LCL	UCL	P	mean	sd	OR_2SD	LCL_2D	UCL_2D	N	OR	LCL	UCL	P	mean	sd	OR_2SD
N_comorb	1	122250	3.3391	3.1933	3.4915	0	1.11092	1.28444	22.1377	19.7395	24.8278	52954	7.6732	6.3305	9.3006	9.07e-96	0.439071	1.098	87.7819	57.5384	133.921	42915	4.4114	4.0644	4.7881	4.01e-276	1.30281	1.17713	32.9231	27.1476	39.9278	13658	3.2845	3.0026	3.593	1.07e-148	2.0142	1.016	11.2067	9.33847	13.449	12723	2.0142	1.8748	2.1639	1.09e-81	2.2903	0.884917	3.45304
age	0	122250	1.0755	1.0731	1.0779	0	52.6537	19.7967	17.8452	16.3361	19.4935	52954	1.0852	1.0671	1.1037	1.7e-21	33.8898	10.3739	5.45905	3.84762	7.74573	42915	1.077	1.066	1.0882	3.64e-45	59.1987	5.59899	2.29494	2.04562	2.5767	13658	1.0656	1.0472	1.0843	8.57e-13	74.0928	2.85124	1.43658	1.30082	1.5865	12723	1.042	1.0288	1.0554	2.45e-10	85.6594	3.25726	1.30738
charlson_score	1	122250	1.8894	1.8282	1.9527	9.07e-314	0.233491	1.01003	3.61568	3.38301	3.86456	52954	3.3539	2.9354	3.8322	7.95e-71	-0.303491	0.645724	4.77231	4.01762	5.66883	42915	2.2298	2.104	2.3631	2.07e-161	0.345116	0.981044	4.82306	4.30372	5.40512	13658	1.7877	1.6797	1.9026	1.22e-74	1.00243	0.997495	3.1865	2.81407	3.60824	12723	1.4175	1.3441	1.495	8.09e-38	1.26649	0.89922	1.87287
Albumin__g_dl	0	46191	0.5079	0.47878	0.53878	5.1e-112	4.00381	0.554989	0.471429	0.441528	0.503353	14407	0.26212	0.20314	0.33822	7.34e-25	4.16514	0.502788	0.260169	0.201342	0.336182	18425	0.39153	0.35282	0.43449	9.26e-70	4.05327	0.527575	0.371798	0.33312	0.414968	6971	0.46463	0.41559	0.51945	2.37e-41	3.85886	0.561214	0.423009	0.373232	0.479422	6388	0.74383	0.6741	0.82078	3.8e-09	3.65549	0.548344	0.722852
GENDER	0	122250	1.7708	1.6799	1.8665	2.39e-100	0.446642	0.497147	1.76499	1.67493	1.85986	52954	2.3676	1.8306	3.0622	5.12e-11	0.416664	0.493011	2.33929	1.81519	3.01467	42915	2.236	2.0056	2.4929	1.17e-47	0.484959	0.49978	2.23522	2.00498	2.4919	13658	1.5118	1.3657	1.6735	1.59e-15	0.499414	0.500018	1.5118	1.36572	1.67353	12723	1.5296	1.4108	1.6584	6.98e-25	0.385522	0.486738	1.51246
Hemoglobin_.HGB.__g_dl	0	50984	0.83623	0.82172	0.85099	2.9e-89	12.9025	1.9269	0.501949	0.469204	0.53696	17319	0.68729	0.63136	0.74816	4.71e-18	13.1488	1.82976	0.253513	0.185827	0.345844	18927	0.76783	0.74362	0.79283	9.44e-59	13.1861	1.88724	0.368923	0.326902	0.416349	7376	0.8279	0.80168	0.85499	1.35e-30	12.5112	2.00055	0.46971	0.412951	0.53428	7362	0.92096	0.89539	0.94727	1e-08	11.9857	1.82445	0.740498
ePVS	1	122250	3.508	3.0908	3.9816	4.71e-84	1.5771	0.157938	1.48652	1.42824	1.54719	52954	16.979	8.8966	32.402	8.8e-18	1.57044	0.132524	2.11827	1.7848	2.51405	42915	6.9889	5.5427	8.8124	1.03e-60	1.56058	0.161476	1.87371	1.73854	2.01939	13658	3.9005	3.1003	4.9071	3.28e-31	1.59882	0.189652	1.67577	1.536	1.82824	12723	1.8047	1.4737	2.2102	1.13e-08	1.63722	0.186561	1.24645
Red_cell_distribution_width.CV_.RDW.CV.__.	1	50295	14.718	11.183	19.372	4.86e-82	2.63283	0.113133	1.83758	1.72684	1.95544	16989	50.204	14.207	177.41	1.2e-09	2.61035	0.112941	2.42195	1.82108	3.22109	18714	60.782	36.33	101.69	3.77e-55	2.62927	0.108998	2.44824	2.18842	2.7389	7303	14.198	8.4313	23.909	1.9e-23	2.65646	0.113856	1.82968	1.62494	2.06022	7289	4.6393	2.9757	7.2328	1.26e-11	2.6707	0.109071	1.39759
E872	0	122250	1.9982	1.8612	2.1454	2.56e-81	0.0478937	0.213542	1.34401	1.30384	1.38542	52954	6.6683	4.6509	9.5609	5.65e-25	0.0175246	0.131217	1.64532	1.49687	1.80849	42915	2.8688	2.4967	3.2964	5.23e-50	0.0518933	0.221814	1.59606	1.50066	1.69753	13658	2.0479	1.7997	2.3303	1.51e-27	0.0995753	0.299444	1.53618	1.42179	1.65973	12723	1.3712	1.2228	1.5376	6.62e-08	0.105321	0.306979	1.21386
AcidBaseBalance	0	122250	1.7098	1.6158	1.8092	3.42e-77	0.140532	0.347539	1.4518	1.39587	1.50999	52954	4.4043	3.2565	5.9565	6.28e-22	0.058277	0.234269	2.00299	1.73877	2.30734	42915	2.3157	2.0641	2.598	1.98e-46	0.147245	0.354354	1.81324	1.67129	1.96724	13658	1.7444	1.5704	1.9377	3.12e-25	0.265778	0.441763	1.63493	1.48998	1.79401	12723	1.2803	1.1768	1.3928	8.98e-09	0.325788	0.468687	1.26061
FluidsLytes	0	122250	1.6945	1.6023	1.7921	3.97e-76	0.188875	0.391411	1.51115	1.44637	1.57884	52954	3.8403	2.8786	5.1234	5.74e-20	0.0850172	0.27891	2.11823	1.8036	2.48774	42915	2.3583	2.1099	2.6361	1.53e-51	0.188978	0.391496	1.95771	1.7943	2.13604	13658	1.7236	1.5544	1.9112	5.39e-25	0.343388	0.474857	1.67706	1.5203	1.84995	12723	1.2453	1.1462	1.3529	2.14e-07	0.454924	0.497984	1.2442
Hematocrit_.HCT.__.	0	50883	0.94435	0.9386	0.95014	2.57e-75	39.1716	5.35892	0.54135	0.50705	0.578004	17237	0.87483	0.84906	0.90138	1.86e-18	39.7088	4.98961	0.263289	0.195371	0.354826	18917	0.91631	0.90606	0.92667	2.19e-52	39.9804	5.26751	0.398213	0.35371	0.448286	7371	0.93891	0.92837	0.94957	6.91e-28	38.2313	5.65814	0.490007	0.431244	0.556787	7358	0.9777	0.96827	0.98722	5.11e-06	36.7756	5.28138	0.788049
Blood_urea_nitrogen_.BUN.__mg_dl	1	53846	2.0682	1.9051	2.2454	2.58e-67	2.75248	0.441426	1.89946	1.76655	2.0424	16891	5.733	3.8701	8.4927	3.04e-18	2.48437	0.364359	3.56984	2.68092	4.75348	21231	2.7375	2.3524	3.1857	9.56e-39	2.76787	0.393406	2.2086	1.96024	2.48844	8072	1.8449	1.5813	2.1523	6.88e-15	2.9537	0.408418	1.64911	1.45399	1.87037	7652	1.5511	1.3625	1.7657	3.19e-11	3.08932	0.396623	1.4165
Red_blood_cell_count_.RBC.__x10.6_ul	0	50543	0.64469	0.61165	0.67951	4.07e-60	4.40425	0.645307	0.56747	0.530222	0.607337	17103	0.3257	0.25262	0.41991	4.98e-18	4.55943	0.575905	0.274697	0.205001	0.368084	18791	0.51133	0.4639	0.5636	1.43e-41	4.48528	0.630959	0.428945	0.379363	0.485005	7332	0.61425	0.55709	0.67727	1.37e-22	4.2218	0.663157	0.523937	0.460275	0.596399	7317	0.85314	0.78511	0.92706	0.000179	4.01624	0.617448	0.821896
LLR	0	122250	0.045182	0.031108	0.065623	1.78e-59	0.259212	0.0627219	0.678069	0.647053	0.71057	52954	0.0003694	4.5379e-05	0.003007	1.49e-13	0.265499	0.0534518	0.429589	0.343322	0.537531	42915	0.0042615	0.0020231	0.0089765	9.26e-47	0.263327	0.0650999	0.491325	0.445907	0.541371	13658	0.043285	0.021375	0.087655	2.73e-18	0.246436	0.0704768	0.642372	0.58156	0.709546	12723	0.25723	0.14713	0.44972	1.9e-06	0.232884	0.0720642	0.822261
CHF	0	122250	1.6177	1.5258	1.7152	1.97e-58	0.100646	0.300861	1.33569	1.28948	1.38354	52954	4.5889	3.1386	6.7092	3.78e-15	0.0173925	0.13073	1.48939	1.34858	1.64491	42915	2.3522	2.0814	2.6582	9.15e-43	0.0929978	0.290433	1.64351	1.53081	1.76453	13658	1.7311	1.5547	1.9275	1.38e-23	0.223825	0.416821	1.58005	1.44466	1.72816	12723	1.2594	1.1587	1.3687	5.71e-08	0.340722	0.47397	1.24433
Calcium.total__mg_dl	0	53348	0.60158	0.56532	0.64016	8.85e-58	9.27887	0.522557	0.587942	0.550959	0.627407	16648	0.32063	0.23313	0.44097	2.64e-12	9.29459	0.478808	0.336467	0.247972	0.456542	21053	0.4457	0.39446	0.5036	1.86e-38	9.33152	0.516038	0.434298	0.382864	0.49264	8018	0.57515	0.51264	0.64529	4.42e-21	9.25497	0.562902	0.536493	0.471309	0.610691	7629	0.7805	0.71014	0.85783	2.73e-07	9.12438	0.555679	0.759252
VolumeUp	0	122250	1.6999	1.5921	1.8149	8.85e-57	0.0675092	0.250903	1.30504	1.26284	1.34863	52954	6.4478	4.6084	9.0216	1.5e-27	0.0211504	0.143887	1.70973	1.55222	1.88324	42915	2.633	2.3108	3.0002	7.21e-48	0.0687172	0.252976	1.63203	1.52773	1.74347	13658	1.8181	1.6087	2.0548	1.03e-21	0.135159	0.341906	1.50499	1.38417	1.63635	12723	1.1523	1.0425	1.2737	0.00552	0.183762	0.387305	1.11609
VolumeDown	0	122250	1.6134	1.5149	1.7182	3.72e-50	0.0838773	0.277205	1.30368	1.25894	1.34998	52954	3.1574	2.1619	4.6113	2.69e-09	0.0373721	0.189674	1.54674	1.33974	1.78575	42915	2.1318	1.8601	2.4431	1.39e-27	0.0729349	0.260033	1.48241	1.38095	1.59131	13658	1.7749	1.5769	1.9976	1.9e-21	0.155147	0.362058	1.51504	1.3907	1.65045	12723	1.2995	1.1881	1.4212	9.86e-09	0.237837	0.425776	1.2499
Renal	0	122250	1.5481	1.4602	1.6413	1.27e-48	0.105162	0.306763	1.30753	1.26145	1.35526	52954	5.4158	3.7639	7.7927	9.04e-20	0.0186766	0.135381	1.57997	1.43173	1.74356	42915	2.4029	2.1276	2.7138	2.85e-45	0.097495	0.296634	1.68219	1.56504	1.80812	13658	1.5504	1.3921	1.7268	1.48e-15	0.238322	0.426073	1.45309	1.32565	1.59281	12723	1.1959	1.1002	1.2999	2.61e-05	0.348031	0.476365	1.18586
NLR	1	122250	1.4678	1.3924	1.5472	3.41e-46	1.11218	0.411175	1.37105	1.31288	1.43177	52954	2.4856	1.846	3.3467	1.98e-09	1.09801	0.357402	1.91715	1.5499	2.37136	42915	1.9903	1.7992	2.2017	9.6e-41	1.08208	0.426928	1.79984	1.65121	1.96185	13658	1.5199	1.3741	1.6812	4.09e-16	1.15377	0.463596	1.47425	1.34267	1.6188	12723	1.1702	1.0791	1.269	0.000144	1.22811	0.477676	1.16205
Glucose.random__mg_dl	1	54036	2.1393	1.9217	2.3814	6.52e-44	4.69991	0.294672	1.56545	1.46956	1.66757	17139	4.0899	2.686	6.2276	5.18e-11	4.61801	0.281797	2.21186	1.74518	2.80333	21136	2.3726	1.9468	2.8915	1.11e-17	4.73123	0.302541	1.68672	1.49645	1.90115	8091	2.4315	1.9867	2.976	6.75e-18	4.76369	0.287334	1.6663	1.48364	1.87147	7670	1.4882	1.2395	1.7868	2.03e-05	4.72932	0.268613	1.23811
E875	0	122250	1.6801	1.5608	1.8085	2.29e-43	0.0459959	0.209477	1.24282	1.20505	1.28175	52954	5.8093	3.8403	8.7879	7.98e-17	0.0112362	0.105405	1.44906	1.32797	1.58117	42915	2.4649	2.1324	2.8492	2.98e-34	0.0487475	0.215342	1.47482	1.3856	1.56979	13658	1.6974	1.483	1.9428	1.59e-14	0.103456	0.304564	1.38028	1.2713	1.49861	12723	1.2003	1.0691	1.3475	0.00199	0.119704	0.324628	1.12582
WithoutComorb	0	122250	0.034489	0.021385	0.055623	2.29e-43	0.222487	0.415918	0.0607558	0.0408249	0.0904185	52954	0.023411	0.007455	0.073519	1.27e-10	0.374155	0.483909	0.026418	0.00872808	0.0799617	42915	0.024178	0.010028	0.058291	1.13e-16	0.146545	0.353656	0.0718732	0.0385686	0.133935	13658	0.054169	0.020252	0.14489	6.3e-09	0.0500073	0.217968	0.28054	0.182696	0.430791	12723	0.071164	0.02951	0.17162	4e-09	0.0325395	0.177435	0.391473
Lymphocyte.percent__.	0	45361	0.97297	0.96919	0.97676	2.45e-43	26.1658	10.6462	0.557976	0.513586	0.606121	15080	0.93483	0.91606	0.95398	7.37e-11	28.4069	10.1097	0.255986	0.169873	0.385741	16826	0.95074	0.94335	0.95819	7.25e-37	27.1732	10.574	0.343625	0.291327	0.405265	6692	0.97304	0.96582	0.98032	6.47e-13	23.5376	10.3039	0.56943	0.488364	0.663912	6763	0.99153	0.986	0.99709	0.00287	21.2632	10.224	0.840351
RESP__breaths_min	1	51169	12.648	8.8093	18.159	5e-43	2.82972	0.15625	2.20993	1.97376	2.47437	20162	17.801	3.2313	98.065	0.000942	2.83744	0.18092	2.8344	1.52867	5.25542	18245	41.37	20.31	84.267	1.12e-24	2.81525	0.136636	2.76564	2.27699	3.35915	6569	26.85	13.562	53.157	3.65e-21	2.82775	0.156206	2.79522	2.25814	3.46006	6193	3.4498	1.9765	6.0213	1.32e-05	2.84934	0.114382	1.32747
E871	0	122250	1.63	1.5203	1.7477	5.65e-43	0.0579959	0.233737	1.25659	1.21632	1.29822	52954	5.2004	3.6195	7.4718	4.79e-19	0.0185066	0.134776	1.55958	1.41444	1.71962	42915	2.6188	2.2822	3.005	8.25e-43	0.0583712	0.234447	1.57052	1.47241	1.67517	13658	1.7704	1.5515	2.0203	2.22e-17	0.112169	0.315585	1.4341	1.31946	1.55873	12723	1.1065	0.99527	1.2303	0.0612	0.162933	0.369319	1.07765
DMcx	0	122250	1.4957	1.4076	1.5893	1.21e-38	0.0977178	0.296934	1.27008	1.22512	1.31671	52954	3.8741	2.6877	5.584	3.86e-13	0.0214526	0.144889	1.4806	1.33176	1.64607	42915	1.9952	1.7692	2.2501	2.04e-29	0.116672	0.321033	1.55817	1.44241	1.68321	13658	1.4413	1.2909	1.6094	8.09e-11	0.227413	0.419176	1.35864	1.2387	1.49024	12723	1.1301	1.0276	1.2427	0.0117	0.211978	0.408726	1.10511
NeuroOther	0	122250	1.4699	1.3863	1.5586	5.3e-38	0.143534	0.350618	1.31014	1.25741	1.36506	52954	2.7926	1.9861	3.9266	3.5e-09	0.0569362	0.231723	1.60953	1.37438	1.88493	42915	2.0113	1.7787	2.2743	7.64e-29	0.120867	0.325976	1.57707	1.45564	1.70863	13658	1.5333	1.3764	1.7081	8.36e-15	0.263728	0.44067	1.45748	1.3252	1.60296	12723	1.212	1.1143	1.3182	7.26e-06	0.451387	0.497651	1.21089
E8770	0	122250	1.9745	1.7729	2.199	3.33e-35	0.0167526	0.128343	1.1908	1.15833	1.22418	52954	10.999	7.0027	17.277	2.27e-25	0.00468331	0.0682749	1.38739	1.30443	1.47563	42915	2.772	2.2732	3.3802	7.22e-24	0.0191541	0.137068	1.32247	1.25247	1.39638	13658	1.824	1.4922	2.2295	4.41e-09	0.0369014	0.188527	1.25435	1.1629	1.35298	12723	1.3215	1.0989	1.5892	0.00306	0.0372554	0.189394	1.11138
Mean_corpuscular_hemoglobin_concentration_.MCHC.__g_dl	0	49606	0.83794	0.81475	0.86179	4.95e-35	32.9081	1.26869	0.638506	0.594613	0.685628	16846	0.8254	0.72181	0.94385	0.00504	33.0933	1.28967	0.609607	0.431345	0.861522	18405	0.77965	0.73896	0.82257	8.81e-20	32.95	1.25055	0.536571	0.469255	0.613535	7206	0.85692	0.81221	0.90408	1.61e-08	32.691	1.26116	0.677406	0.591772	0.775425	7149	0.87245	0.83467	0.91195	1.54e-09	32.5828	1.1756	0.725561
E876	0	122250	1.4839	1.3924	1.5815	5.83e-34	0.0965399	0.295331	1.26255	1.21595	1.31094	52954	3.2734	2.3289	4.601	8.67e-12	0.0443026	0.205769	1.62907	1.41611	1.87408	42915	1.9619	1.7216	2.2358	5.09e-24	0.100291	0.300391	1.49914	1.38594	1.62156	13658	1.5064	1.3366	1.6978	1.88e-11	0.172866	0.378145	1.36328	1.24536	1.49232	12723	1.173	1.0669	1.2896	0.000973	0.219367	0.413834	1.14116
E870	0	122250	1.8615	1.6833	2.0586	1.04e-33	0.0178814	0.132521	1.17903	1.148	1.2109	52954	6.8933	3.8892	12.218	3.82e-11	0.00373909	0.0610343	1.26574	1.18033	1.35734	42915	2.512	2.0247	3.1165	5.7e-17	0.0167307	0.128262	1.26652	1.19836	1.33856	13658	1.9573	1.6271	2.3545	1.05e-12	0.0410748	0.198471	1.30548	1.21316	1.40482	12723	1.4643	1.2612	1.7002	5.57e-07	0.0557259	0.229401	1.19123
Neutrophil.percent__.	0	45373	1.0204	1.017	1.0237	1.3e-33	62.0583	11.6189	1.59784	1.47953	1.72342	15078	1.0494	1.0313	1.0679	5.82e-08	60.8845	11.3571	2.99264	2.01387	4.44684	16829	1.0397	1.0328	1.0465	7.04e-31	60.9116	11.464	2.43889	2.09587	2.83518	6697	1.0205	1.0142	1.027	2.14e-10	63.8719	11.6079	1.60318	1.38728	1.85617	6769	1.0064	1.0016	1.0112	0.00833	65.7295	11.5985	1.16022
E860	0	122250	1.5086	1.4093	1.6149	2.64e-32	0.0675092	0.250903	1.22917	1.18788	1.27189	52954	2.4253	1.5601	3.7701	8.28e-05	0.0322355	0.176627	1.36747	1.17012	1.59808	42915	1.9326	1.6571	2.254	4.58e-17	0.0559012	0.229734	1.35356	1.2612	1.45268	13658	1.6896	1.4854	1.9219	1.45e-15	0.122273	0.327612	1.41011	1.29597	1.53429	12723	1.2646	1.1499	1.3907	1.31e-06	0.194687	0.395975	1.20431
Cholesterol.HDL__mg_dl	1	31677	0.4299	0.37378	0.49445	2.8e-32	3.88991	0.302221	0.600332	0.551659	0.653303	8951	0.20964	0.088237	0.49808	0.000402	3.88377	0.288154	0.406406	0.246814	0.669193	14383	0.22802	0.17122	0.30368	4.84e-24	3.89866	0.303584	0.407555	0.342483	0.484997	4860	0.47804	0.38074	0.60022	2.07e-10	3.8801	0.314555	0.628566	0.544715	0.725326	3483	0.7011	0.53696	0.9154	0.00907	3.88328	0.313284	0.800515
Creatinine__mg_dl	1	53226	1.8779	1.6899	2.0868	1.12e-31	-0.106648	0.325661	1.50746	1.40738	1.61467	16838	3.6605	1.8075	7.4131	0.000313	-0.237675	0.279668	2.06637	1.39249	3.06636	20911	2.6504	2.1296	3.2985	2.5e-18	-0.102117	0.300146	1.79518	1.57425	2.04711	7884	1.7064	1.3983	2.0824	1.44e-07	0.00572618	0.341499	1.4405	1.25732	1.65036	7593	1.5846	1.3636	1.8413	1.88e-09	0.0547562	0.351493	1.38209
COPD	0	122250	1.4354	1.3492	1.527	2.4e-30	0.0876483	0.282784	1.22679	1.18459	1.2705	52954	3.3314	2.0546	5.4019	1.06e-06	0.0117272	0.107656	1.29577	1.16771	1.43789	42915	1.8071	1.5854	2.0596	7.71e-19	0.0978679	0.297139	1.42139	1.31504	1.53629	13658	1.5684	1.4042	1.7518	1.51e-15	0.215185	0.410966	1.44758	1.32183	1.58536	12723	1.1244	1.0255	1.2329	0.0126	0.232257	0.422288	1.10412
Coagulopathy	0	122250	1.5061	1.4038	1.6158	3.63e-30	0.0611043	0.239523	1.21673	1.17643	1.25842	52954	3.5149	2.3493	5.2589	9.66e-10	0.0255127	0.157678	1.48647	1.30911	1.68787	42915	2.0811	1.8013	2.4042	2.51e-23	0.060212	0.237882	1.41719	1.32312	1.51793	13658	1.4314	1.2517	1.637	1.62e-07	0.118978	0.323774	1.26144	1.15647	1.37596	12723	1.2705	1.1463	1.4081	5.08e-06	0.150122	0.357205	1.18652
Anemia	0	122250	1.379	1.3042	1.458	1.29e-29	0.205546	0.404102	1.29654	1.23943	1.35628	52954	3.1509	2.3353	4.2515	5.96e-14	0.117045	0.321477	2.09158	1.72515	2.53585	42915	1.9238	1.7206	2.1509	1.48e-30	0.19718	0.397874	1.68313	1.54008	1.83943	13658	1.4505	1.308	1.6084	1.77e-12	0.341046	0.474078	1.42277	1.28992	1.56926	12723	1.0521	0.96911	1.1421	0.226	0.456653	0.498137	1.05187
Neutrophil.absolute__x10.3_ul	1	45203	1.5865	1.4628	1.7207	7.74e-29	1.47124	0.463862	1.53448	1.42313	1.65451	15009	2.3886	1.5532	3.6732	7.33e-05	1.47905	0.46896	2.26288	1.51132	3.38818	16766	1.8423	1.5675	2.1652	1.23e-13	1.41638	0.459956	1.75428	1.51208	2.0353	6681	1.752	1.4986	2.0481	1.96e-12	1.49731	0.455684	1.66703	1.44582	1.92201	6747	1.2842	1.1357	1.4521	6.59e-05	1.56437	0.451809	1.25362
LiverSevere	0	122250	2.6559	2.2217	3.175	7.77e-27	0.00685481	0.0825098	1.17491	1.1408	1.21003	52954	9.7261	5.4044	17.504	3.25e-14	0.00241719	0.049106	1.25034	1.18022	1.32462	42915	2.7009	2.0488	3.5605	1.82e-12	0.0107422	0.103087	1.22734	1.15937	1.29929	13658	1.9742	1.4107	2.7628	7.29e-05	0.012813	0.112471	1.16533	1.08047	1.25683	12723	1.9147	1.2691	2.8886	0.00196	0.00581624	0.0760451	1.10383
White_blood_cell_count_.WBC.__x10.3_ul	1	50568	1.7947	1.6126	1.9974	8.81e-27	1.95777	0.332923	1.47611	1.37461	1.58512	17112	2.4366	1.3785	4.3066	0.00218	1.98936	0.334056	1.81305	1.23919	2.65261	18813	1.6901	1.3623	2.0967	1.83e-06	1.91993	0.330032	1.41394	1.22639	1.63018	7331	2.1194	1.7252	2.6037	8.4e-13	1.95462	0.33048	1.64293	1.43397	1.8823	7312	1.5624	1.3301	1.8352	5.51e-08	1.98435	0.330053	1.34251
Alkaline_phosphatase.total_.ALP.__u_l	1	45297	1.8512	1.6522	2.0743	2.67e-26	4.33094	0.332104	1.50539	1.39585	1.62356	14186	5.4159	3.0825	9.5156	4.23e-09	4.25694	0.335336	3.10494	2.12762	4.53116	18086	2.9272	2.337	3.6665	8.84e-21	4.36247	0.324438	2.00758	1.73466	2.32343	6806	2	1.6083	2.487	4.57e-10	4.36413	0.327588	1.57479	1.36523	1.81651	6219	1.1779	0.99038	1.401	0.0642	4.37173	0.324149	1.11201
DM	0	122250	1.3445	1.2729	1.4202	3.05e-26	0.193243	0.394844	1.26335	1.20991	1.31919	52954	2.8753	2.1422	3.8593	2.02e-12	0.0727801	0.259778	1.73106	1.48559	2.01708	42915	1.5694	1.4092	1.7478	2.33e-16	0.246557	0.431012	1.47476	1.34406	1.6182	13658	1.3107	1.1827	1.4525	2.46e-07	0.369161	0.482595	1.29842	1.17581	1.43375	12723	1.0812	0.99292	1.1774	0.0724	0.325945	0.468745	1.07597
MI	0	122250	1.424	1.3323	1.5221	2.49e-25	0.0638364	0.244462	1.18867	1.15059	1.22801	52954	2.992	1.8105	4.9446	1.9e-05	0.009631	0.0976649	1.23871	1.12294	1.36642	42915	1.9137	1.6645	2.2003	7.75e-20	0.0668298	0.24973	1.38288	1.2898	1.48271	13658	1.4547	1.2865	1.645	2.25e-09	0.148997	0.356098	1.30598	1.19652	1.42545	12723	1.1906	1.0809	1.3113	0.000403	0.187927	0.39067	1.146
Lymphocyte.absolute__x10.3_ul	1	44870	0.67271	0.62391	0.72532	5.79e-25	0.51468	0.447027	0.701567	0.655885	0.750423	14909	0.37428	0.26786	0.52299	8.54e-09	0.64817	0.398024	0.457346	0.350419	0.596908	16654	0.44951	0.39413	0.51267	9.27e-33	0.523792	0.440962	0.494018	0.439931	0.554752	6630	0.70026	0.60577	0.80948	1.45e-06	0.394878	0.454002	0.72359	0.634358	0.825374	6677	0.94102	0.83541	1.06	0.317	0.312846	0.452316	0.946487
Hypotension	0	122250	1.434	1.3367	1.5384	8.47e-24	0.0570634	0.231965	1.18204	1.14412	1.2212	52954	3.9332	2.4931	6.205	3.93e-09	0.0154663	0.123399	1.40211	1.25289	1.56909	42915	1.972	1.6917	2.2987	3.92e-18	0.0525923	0.223221	1.35412	1.26454	1.45004	13658	1.5935	1.3983	1.816	2.8e-12	0.120076	0.325062	1.3538	1.24354	1.47386	12723	1.1409	1.0322	1.261	0.00984	0.177631	0.382217	1.10604
WeightLoss	0	122250	1.3948	1.3045	1.4913	1.88e-22	0.0741104	0.261952	1.19043	1.14943	1.23291	52954	2.5617	1.6751	3.9178	1.43e-05	0.0305548	0.17211	1.38237	1.19432	1.60006	42915	1.999	1.7338	2.3047	1.45e-21	0.0659909	0.248269	1.41047	1.31423	1.51374	13658	1.349	1.1847	1.5361	6.23e-06	0.136843	0.343694	1.2285	1.12356	1.34321	12723	1.1918	1.0845	1.3098	0.000268	0.215437	0.411141	1.15525
E874	0	122250	2.6742	2.191	3.2639	3.88e-22	0.00392638	0.062538	1.13092	1.10308	1.15946	52954	13.688	6.6073	28.356	1.91e-12	0.00117083	0.0341976	1.19597	1.13785	1.25705	42915	3.125	2.2064	4.426	1.4e-10	0.00463707	0.0679388	1.16745	1.11352	1.22399	13658	2.1353	1.4951	3.0496	3.02e-05	0.00959145	0.0974687	1.15938	1.08156	1.24279	12723	1.8444	1.2601	2.6995	0.00163	0.00691661	0.0828813	1.1068
Dementia	0	122250	1.3811	1.2929	1.4753	8.84e-22	0.0622086	0.241535	1.1688	1.13212	1.20665	52954	4.1067	1.2899	13.075	0.0168	0.00145409	0.0381052	1.11366	1.01959	1.21642	42915	2.3568	1.9544	2.8419	2.8e-19	0.023232	0.150641	1.29471	1.22371	1.36982	13658	1.7968	1.5882	2.0329	1.32e-20	0.135671	0.342452	1.49387	1.37278	1.62566	12723	1.2133	1.114	1.3215	9.11e-06	0.367681	0.482193	1.20501
Arrhythmia	0	122250	1.3104	1.2389	1.386	3.62e-21	0.234356	0.423597	1.25736	1.199	1.31856	52954	2.3383	1.7538	3.1176	7.13e-09	0.116422	0.320733	1.7244	1.43385	2.07381	42915	1.6075	1.4407	1.7936	2.02e-17	0.232949	0.422715	1.49379	1.36164	1.63873	13658	1.2218	1.1021	1.3544	0.00014	0.411847	0.492186	1.21795	1.10043	1.34799	12723	1.145	1.0522	1.2459	0.00168	0.539417	0.498463	1.14451
E873	0	122250	2.1496	1.8269	2.5292	2.94e-20	0.00692843	0.0829487	1.13537	1.10514	1.16642	52954	8.8033	4.6994	16.491	1.11e-11	0.00247385	0.0496767	1.24123	1.16619	1.32111	42915	3.1191	2.3691	4.1064	5.18e-16	0.00822556	0.0903222	1.22813	1.1686	1.29068	13658	1.6187	1.1399	2.2987	0.00711	0.0129594	0.113104	1.1151	1.03006	1.20717	12723	1.5233	1.1598	2.0009	0.00248	0.0146192	0.120028	1.10632
INSURANCE_Uninsured	0	122250	2.2386	1.8687	2.6817	2.21e-18	0.016409	0.127043	1.22723	1.17218	1.28485	52954	2.7877	1.5026	5.1719	0.00115	0.0216603	0.145573	1.34782	1.12587	1.61353	42915	2.129	1.5259	2.9703	8.7e-06	0.0145171	0.11961	1.19813	1.10638	1.29749	13658	2.3136	1.6315	3.2807	2.51e-06	0.0100308	0.0996537	1.18196	1.10248	1.26717	12723	2.2677	1.667	3.085	1.85e-07	0.00778118	0.0878706	1.15476
Psychoses	0	122250	1.3698	1.2723	1.4748	6.51e-17	0.0811697	0.273097	1.18753	1.14058	1.23641	52954	2.0041	1.3516	2.9714	0.000541	0.0541791	0.226373	1.3699	1.14615	1.63731	42915	1.4805	1.2689	1.7274	6.16e-07	0.0811371	0.273049	1.23897	1.13889	1.34784	13658	1.5939	1.3901	1.8276	2.4e-11	0.117367	0.321869	1.35002	1.23619	1.47429	12723	1.1042	0.98778	1.2344	0.0812	0.154759	0.361689	1.07436
DBP__mm_Hg	0	66712	0.98198	0.97775	0.98622	1.43e-16	75.0205	9.39171	0.710624	0.655307	0.770562	26870	1.0141	0.99488	1.0337	0.151	75.3936	9.79156	1.31598	0.904364	1.91377	24392	0.97159	0.96317	0.98008	8.42e-11	77.0184	8.78106	0.602797	0.517356	0.702318	8196	0.97546	0.96717	0.98382	1.15e-08	72.4936	8.38388	0.659288	0.571366	0.760696	7254	0.98785	0.98133	0.99442	0.000298	69.775	8.28928	0.816551
PVD	0	122250	1.2729	1.1998	1.3504	1.24e-15	0.115526	0.319656	1.16679	1.12351	1.21173	52954	2.0631	1.2515	3.4008	0.00451	0.0152585	0.122581	1.19428	1.05654	1.34997	42915	1.6652	1.4685	1.8882	1.82e-15	0.111639	0.314926	1.37875	1.27381	1.49235	13658	1.3076	1.174	1.4563	1.08e-06	0.278665	0.448358	1.27184	1.15471	1.40084	12723	1.0734	0.98687	1.1676	0.0986	0.370824	0.483045	1.07086
Valvular	0	122250	1.2745	1.1999	1.3538	3.23e-15	0.110928	0.314045	1.16458	1.12127	1.20956	52954	3.2421	2.204	4.7694	2.33e-09	0.0271556	0.162538	1.46575	1.29292	1.6617	42915	1.5709	1.3786	1.7901	1.21e-11	0.108377	0.31086	1.3242	1.22093	1.43621	13658	1.1964	1.0665	1.3422	0.00224	0.233856	0.423297	1.16396	1.05602	1.28295	12723	1.1658	1.0714	1.2686	0.000372	0.336241	0.472441	1.156
Hemoglobin_A1C__.	1	27169	2.6361	2.0692	3.3582	4.28e-15	1.84365	0.203951	1.48494	1.34529	1.63908	7336	5.7601	2.2142	14.985	0.000331	1.78375	0.213123	2.10925	1.40329	3.17043	12071	3.4647	2.2723	5.2829	7.76e-09	1.86569	0.20523	1.66538	1.4006	1.9802	4499	2.7042	1.7343	4.2167	1.14e-05	1.87429	0.1852	1.44553	1.22623	1.70408	3263	1.4945	0.95781	2.332	0.0767	1.85455	0.17285	1.14901
Carbon_dioxide.total_.CO2.__mmol_l	0	51259	0.95477	0.94375	0.96592	5.43e-15	25.6483	2.92029	0.76313	0.713099	0.816672	15914	0.88057	0.8238	0.94124	0.000183	24.9824	2.73035	0.499302	0.346999	0.718432	20286	0.96397	0.94091	0.98758	0.00296	25.91	2.84913	0.811297	0.706757	0.931261	7699	0.94328	0.92238	0.96465	3.24e-07	26.0123	3.03272	0.701738	0.612581	0.803889	7360	0.96162	0.94549	0.97803	5.79e-06	25.9858	3.14387	0.781864
IMM_58160084252	0	122250	0.75883	0.7077	0.81366	8.91e-15	0.266119	0.441929	0.783547	0.736696	0.833382	52954	0.54525	0.39123	0.75993	0.000342	0.297541	0.457181	0.574323	0.42397	0.778008	42915	0.62585	0.5477	0.71515	5.71e-12	0.275102	0.446571	0.657988	0.584092	0.741235	13658	0.70586	0.61569	0.80924	5.87e-07	0.21233	0.408972	0.752076	0.672527	0.841032	12723	0.97334	0.8748	1.083	0.62	0.162776	0.369176	0.980248
Cholesterol.total__mg_dl	0	31818	0.99474	0.99341	0.99607	1.05e-14	176.561	42.0777	0.641552	0.573258	0.717931	8999	0.99725	0.99019	1.0044	0.448	181.533	37.2538	0.814619	0.479731	1.38696	14444	0.98975	0.98723	0.99228	2.48e-15	182.171	42.8874	0.413238	0.332074	0.514402	4880	0.99607	0.99357	0.99858	0.00216	164.267	42.1669	0.717644	0.580412	0.887063	3495	0.99811	0.99604	1.0002	0.0757	157.737	41.2718	0.855703
Obesity	0	122250	1.2484	1.1791	1.3218	2.61e-14	0.28328	0.450593	1.22133	1.16006	1.28586	52954	1.7855	1.3604	2.3434	2.93e-05	0.235147	0.424095	1.63509	1.2983	2.05921	42915	1.235	1.1078	1.3769	0.000142	0.340906	0.474019	1.22155	1.10192	1.35421	13658	1.2356	1.1114	1.3736	9.02e-05	0.345365	0.475505	1.22285	1.10566	1.3524	12723	1.1003	0.99999	1.2106	0.05	0.222589	0.416001	1.08274
Pulmonary	0	122250	1.2355	1.1695	1.3052	4.3e-14	0.250348	0.433215	1.20108	1.1453	1.25958	52954	1.4541	1.0824	1.9533	0.0129	0.175265	0.380197	1.32933	1.06206	1.66379	42915	1.3915	1.2465	1.5534	4.03e-09	0.26888	0.443383	1.34041	1.21578	1.47783	13658	1.2595	1.1359	1.3964	1.19e-05	0.371357	0.483185	1.24973	1.13104	1.38081	12723	1.0735	0.98756	1.167	0.0957	0.370432	0.482939	1.07094
PULSE__bpm	1	64073	2.6611	2.0634	3.4319	4.65e-14	4.34864	0.158935	1.36495	1.25892	1.47989	25702	34.44	10.018	118.4	1.93e-08	4.39379	0.165426	3.22508	2.14343	4.85256	23426	3.9272	2.3668	6.5163	1.19e-07	4.33277	0.146203	1.49181	1.28649	1.72989	7905	2.3812	1.4748	3.8448	0.000386	4.29941	0.149214	1.29553	1.12293	1.49466	7040	1.7206	1.1614	2.5491	0.00681	4.29193	0.14021	1.16437
IMM_70461031903	0	122250	0.81117	0.76753	0.85729	1.19e-13	0.385088	0.486618	0.815726	0.772984	0.86083	52954	0.90339	0.68655	1.1887	0.468	0.352419	0.477728	0.907484	0.698148	1.17958	42915	0.69767	0.62369	0.78044	3.09e-10	0.393965	0.488633	0.703407	0.63042	0.784851	13658	0.76244	0.6852	0.84838	6.45e-07	0.433738	0.495608	0.764258	0.687479	0.849606	12723	0.90274	0.83033	0.98146	0.0165	0.43889	0.496271	0.903426
Erythrocyte_sedimentation_rate_.ESR.__mm_hr	1	6360	1.4827	1.3361	1.6453	1.2e-13	2.84644	1.12427	2.4245	1.91846	3.06361	1883	2.5176	1.4974	4.2331	0.000496	2.57601	1.10338	7.67177	2.43741	24.1484	2632	1.6076	1.3236	1.9527	1.7e-06	2.87221	1.12835	2.91949	1.88264	4.52767	1044	1.4767	1.2145	1.7956	9.3e-05	3.01429	1.10799	2.37232	1.53824	3.65868	801	NA	NA	NA	NA	NA	NA	NA
Stroke	0	122250	1.2517	1.179	1.3289	1.99e-13	0.106536	0.308523	1.14859	1.10695	1.19179	52954	2.926	1.8973	4.5124	1.19e-06	0.0182611	0.133895	1.3331	1.18709	1.49708	42915	1.6902	1.4864	1.922	1.19e-15	0.10148	0.301966	1.37298	1.27045	1.48377	13658	1.231	1.1014	1.3758	0.00025	0.248133	0.431945	1.19663	1.08702	1.31734	12723	1.0764	0.98935	1.1711	0.087	0.338992	0.473386	1.0722
Globulin__g_dl	1	20619	2.9653	2.2181	3.9642	2.16e-13	1.07273	0.193538	1.52309	1.3612	1.70424	6081	25.267	5.7635	110.77	1.85e-05	1.07262	0.182481	3.24995	1.89505	5.5736	8868	12.277	6.7812	22.225	1.22e-16	1.06584	0.194393	2.65105	2.10475	3.33913	3102	2.5516	1.4337	4.5414	0.00145	1.06877	0.201183	1.45777	1.15599	1.83836	2568	1.3324	0.86638	2.0492	0.191	1.10157	0.203815	1.12411
Protein.total__g_dl	0	45641	0.80771	0.76217	0.85596	5.45e-13	7.10776	0.619179	0.767623	0.714394	0.824809	14320	0.46528	0.34866	0.62091	2.02e-07	7.28168	0.562681	0.422725	0.305518	0.584901	18211	0.75293	0.66997	0.84617	1.89e-06	7.14213	0.587516	0.716445	0.624611	0.821789	6837	0.7378	0.65764	0.82773	2.19e-07	6.95483	0.612446	0.689033	0.598488	0.793273	6273	0.92095	0.84656	1.0019	0.0553	6.77763	0.670065	0.895516
African	0	122250	1.455	1.3134	1.612	7.15e-13	0.210102	0.407383	1.35738	1.24872	1.47555	52954	1.1825	0.82924	1.6863	0.355	0.210881	0.407938	1.14658	0.858328	1.53162	42915	1.2964	1.0887	1.5436	0.00356	0.227962	0.419523	1.24333	1.07391	1.43943	13658	1.3577	1.1165	1.6511	0.00219	0.217528	0.41258	1.28702	1.09519	1.51251	12723	1.7641	1.4547	2.1394	7.99e-09	0.138647	0.345591	1.48046
PHTN	0	122250	1.4669	1.3209	1.629	7.94e-13	0.0237219	0.152182	1.12368	1.0884	1.16012	52954	2.4201	1.2603	4.6472	0.00793	0.00853571	0.0919946	1.17658	1.04348	1.32665	42915	1.8754	1.505	2.337	2.12e-08	0.0243971	0.15428	1.21413	1.13444	1.29943	13658	1.5495	1.2803	1.8752	6.84e-06	0.0484698	0.214765	1.20696	1.11197	1.31003	12723	1.2072	1.0321	1.4122	0.0185	0.0580838	0.233911	1.09211
E861	0	122250	1.5852	1.3955	1.8008	1.4e-12	0.0130798	0.113617	1.11037	1.07867	1.14301	52954	2.8838	1.1758	7.0733	0.0207	0.00332364	0.0575557	1.12966	1.01882	1.25257	42915	2.3332	1.8345	2.9675	5.01e-12	0.0143773	0.119042	1.2235	1.15542	1.29559	13658	1.6249	1.2773	2.0671	7.73e-05	0.0271636	0.162566	1.17096	1.08283	1.26629	12723	1.1948	0.9807	1.4557	0.0773	0.03419	0.181724	1.06684
IMM_ZOSTER	0	122250	0.71147	0.64731	0.78199	1.66e-12	0.0551493	0.228272	0.856058	0.819906	0.893803	52954	1.4264e-05	0	Inf	0.989	0.000434339	0.0208365	0.62815	0	NA	42915	0.47536	0.37211	0.60724	2.64e-09	0.0714436	0.257567	0.681744	0.600949	0.773395	13658	0.59663	0.50402	0.70625	1.96e-09	0.154488	0.361429	0.688438	0.609413	0.777711	12723	0.85359	0.74904	0.97274	0.0176	0.121276	0.326461	0.901805
Iron_binding_capacity.total_.TIBC.__ug_dl	0	7064	0.99625	0.99521	0.9973	2.72e-12	307.344	85.4018	0.52681	0.440381	0.630152	2096	0.98726	0.98273	0.99181	4.67e-08	345.363	85.6007	0.111399	0.0506672	0.244653	2536	0.99345	0.9914	0.9955	4.34e-10	302.073	80.5218	0.346853	0.248835	0.48368	1231	0.99667	0.99459	0.99874	0.00167	283.332	77.6134	0.595626	0.430824	0.822251	1201	0.99954	0.99794	1.0011	0.575	276.736	78.4326	0.930535
C.reactive_protein_.CRP.__mg_l	1	6659	1.227	1.158	1.3002	4.26e-12	2.12966	1.63227	1.9502	1.61428	2.35609	2025	1.6067	1.2114	2.1311	0.000999	1.76276	1.57018	4.43327	1.82622	10.7631	2618	1.3203	1.183	1.4735	7.03e-07	2.10389	1.62396	2.46562	1.72603	3.52199	1071	1.1956	1.068	1.3383	0.00191	2.39523	1.61269	1.77909	1.23638	2.55966	945	NA	NA	NA	NA	NA	NA	NA
Glomerular_filtration_rate1.73_sq_M.predicted.black__NA	0	2239	0.97995	0.97431	0.98562	5.9e-12	79.6174	36.6285	0.226802	0.14859	0.346081	519	NA	NA	NA	NA	NA	NA	NA	NA	NA	993	NA	NA	NA	NA	NA	NA	NA	NA	NA	371	NA	NA	NA	NA	NA	NA	NA	NA	NA	356	NA	NA	NA	NA	NA	NA	NA
E8779	0	122250	2.1597	1.731	2.6945	9.04e-12	0.00347648	0.0588594	1.09487	1.06672	1.12376	52954	7.6303	3.2712	17.798	2.57e-06	0.000981984	0.0313215	1.13576	1.07707	1.19764	42915	2.35	1.5783	3.4989	2.59e-05	0.00447396	0.0667387	1.1208	1.06281	1.18196	13658	2.1124	1.41	3.1647	0.000288	0.00695563	0.0831129	1.13236	1.05878	1.21107	12723	1.5489	1.0435	2.2991	0.0299	0.00675941	0.0819405	1.07434
Cholesterol.LDL__mg_dl	0	31695	0.99455	0.99294	0.99616	3.29e-11	99.9136	35.4108	0.678914	0.605456	0.76149	8872	0.99539	0.98684	1.004	0.295	105.949	32.3538	0.741736	0.424347	1.29475	14403	0.98883	0.98582	0.99185	5.35e-13	103.981	36.0312	0.445127	0.357308	0.554486	4905	0.99596	0.99297	0.99896	0.00829	88.7137	34.338	0.757314	0.616007	0.931033	3515	0.9987	0.99619	1.0012	0.311	83.6422	33.1818	0.91724
Paralysis	0	122250	1.4212	1.2804	1.5776	4.08e-11	0.0232802	0.150793	1.11184	1.07739	1.14739	52954	3.0547	1.6318	5.7182	0.000482	0.00679835	0.0821722	1.20144	1.0838	1.33184	42915	2.1736	1.7963	2.6301	1.44e-15	0.0256321	0.158037	1.27812	1.20338	1.35751	13658	1.192	0.97385	1.4589	0.0886	0.0519842	0.222003	1.08108	0.988304	1.18257	12723	1.0854	0.91943	1.2814	0.333	0.0531321	0.224306	1.03746
Mets	0	122250	1.5047	1.332	1.6998	5.02e-11	0.0177751	0.132133	1.11403	1.0787	1.1505	52954	4.2266	1.9773	9.0349	0.0002	0.00502323	0.0706972	1.22606	1.10119	1.36509	42915	2.3584	1.8789	2.9603	1.38e-13	0.0206222	0.142117	1.27618	1.19634	1.36135	13658	1.5979	1.2997	1.9645	8.68e-06	0.0412945	0.198978	1.20505	1.10995	1.30828	12723	1.0137	0.82078	1.2519	0.9	0.0359978	0.186292	1.00507
Oxygen_saturation_.SpO2..pulse_oximetry__.	0	64154	0.94109	0.92304	0.95949	7.99e-10	97.4509	1.65533	0.817912	0.767109	0.872052	24840	0.7357	0.66877	0.80934	2.86e-10	98.0831	1.36164	0.433507	0.334334	0.562102	23469	0.95254	0.9139	0.99281	0.0214	97.2853	1.58393	0.857246	0.751852	0.9774	8324	0.93306	0.89984	0.96751	0.00018	96.8887	1.761	0.783465	0.689557	0.890181	7521	0.96736	0.93997	0.99555	0.0236	96.5015	1.82566	0.885897
HTN	0	122250	1.2165	1.1418	1.296	1.33e-09	0.396172	0.489103	1.2113	1.1385	1.2887	52954	2.5771	1.9516	3.4032	2.5e-11	0.149696	0.356777	1.96503	1.61142	2.39624	42915	1.297	1.1591	1.4513	5.78e-06	0.494932	0.49998	1.29697	1.15909	1.45128	13658	1.141	1.0116	1.2869	0.0317	0.699736	0.458389	1.12856	1.01063	1.26017	12723	0.96953	0.8762	1.0728	0.549	0.763028	0.425242	0.974022
Depression	0	122250	1.2025	1.1323	1.2771	1.87e-09	0.196761	0.397552	1.15795	1.10384	1.21467	52954	1.4014	1.0088	1.9469	0.0442	0.146221	0.353331	1.26933	1.00621	1.60128	42915	1.2193	1.0762	1.3816	0.00186	0.204567	0.40339	1.17351	1.06104	1.29795	13658	1.3957	1.2465	1.5627	7.45e-09	0.257139	0.437072	1.33832	1.21241	1.47732	12723	1.0313	0.94267	1.1282	0.502	0.315963	0.464917	1.02904
Glomerular_filtration_rate1.73_sq_M.predicted__NA	0	6694	0.98263	0.97691	0.98837	3.83e-09	95.0471	27.2464	0.384772	0.279992	0.52863	2234	0.96385	0.94379	0.98433	0.000601	115.378	21.3668	0.207306	0.0843984	0.509188	2955	0.97816	0.96874	0.98767	7.75e-06	92.5342	20.7536	0.399912	0.267609	0.597521	912	NA	NA	NA	NA	NA	NA	NA	NA	NA	593	NA	NA	NA	NA	NA	NA	NA
Monocyte.absolute__x10.3_ul	1	44748	1.3541	1.2241	1.4979	3.94e-09	-0.572306	0.374272	1.2547	1.16342	1.35318	14815	1.7712	1.0189	3.079	0.0427	-0.624913	0.366699	1.52082	1.01383	2.28139	16600	1.4859	1.2099	1.8249	0.000158	-0.601419	0.369789	1.3403	1.15133	1.56029	6642	1.505	1.2342	1.8354	5.39e-05	-0.516933	0.367501	1.35052	1.16726	1.56258	6691	1.1447	0.98599	1.3289	0.0759	-0.438565	0.36968	1.10508
Triglycerides_.TG.__mg_dl	1	31566	1.3705	1.2333	1.523	4.78e-09	4.70897	0.509064	1.37835	1.238	1.53466	8853	2.8041	1.6361	4.8059	0.000176	4.65265	0.549073	3.10269	1.7171	5.60645	14334	1.5818	1.2992	1.9259	4.95e-06	4.75625	0.501405	1.58389	1.30016	1.92945	4888	1.3725	1.1279	1.6703	0.00157	4.70989	0.475694	1.35157	1.12132	1.62916	3491	1.0847	0.91108	1.2913	0.361	4.65642	0.458031	1.07728
LiverMild	0	122250	1.2606	1.1659	1.363	6.24e-09	0.0868712	0.281647	1.13933	1.09031	1.19059	52954	2.3742	1.6743	3.3668	1.22e-06	0.0493447	0.216589	1.45434	1.25014	1.69192	42915	1.2322	1.0713	1.4173	0.00345	0.120657	0.325732	1.1457	1.04589	1.25508	13658	1.2834	1.1172	1.4743	0.00042	0.127325	0.333348	1.181	1.07669	1.29538	12723	1.0222	0.88688	1.1781	0.762	0.0856716	0.27989	1.01235
AST_ALT	1	122250	1.3211	1.2017	1.4524	8.26e-09	0.0908297	0.248631	1.14853	1.09567	1.20392	52954	1.3635	0.79949	2.3252	0.255	0.081541	0.223584	1.1487	0.904776	1.45838	42915	1.8705	1.5395	2.2726	2.92e-10	0.0630513	0.251896	1.37091	1.2428	1.51221	13658	1.3158	1.0987	1.5759	0.00285	0.12556	0.272383	1.16128	1.05262	1.28117	12723	1.134	0.98288	1.3082	0.0848	0.185905	0.281008	1.07321
IMM_00005197105	0	122250	0.82102	0.76757	0.8782	9.39e-09	0.104916	0.306447	0.886153	0.850334	0.923483	52954	2.113	1.1446	3.9007	0.0168	0.0293651	0.168829	1.28738	1.04666	1.58345	42915	0.87513	0.74024	1.0346	0.118	0.0809041	0.272691	0.929836	0.848708	1.01872	13658	0.60973	0.53895	0.6898	3.87e-15	0.308976	0.462088	0.633034	0.564811	0.709499	12723	0.88697	0.80808	0.97357	0.0116	0.281302	0.449652	0.897752
ELR	1	122250	0.8595	0.81594	0.90538	1.16e-08	-3.75417	0.414782	0.881967	0.844724	0.920849	52954	0.74249	0.56329	0.97871	0.0346	-3.76988	0.384902	0.795166	0.642854	0.98357	42915	0.73592	0.66374	0.81595	5.81e-09	-3.74118	0.40752	0.778863	0.716014	0.847232	13658	0.96863	0.87351	1.0741	0.546	-3.73561	0.465678	0.97075	0.881657	1.06884	12723	0.88342	0.8185	0.95349	0.00146	-3.75252	0.491538	0.885277
Ferritin__ng_ml	1	7593	1.1956	1.1243	1.2713	1.21e-08	4.456	1.41129	1.65568	1.39194	1.96901	2329	1.9761	1.5825	2.4675	1.85e-09	3.84945	1.43692	7.08084	3.7401	13.4057	2804	1.302	1.1534	1.4696	1.97e-05	4.67339	1.35375	2.04298	1.47167	2.8359	1252	1.0916	0.97206	1.2259	0.139	4.81894	1.29084	1.25395	0.929453	1.69185	1208	1.0628	0.96059	1.1759	0.238	4.7447	1.23409	1.16223
Mean_corpuscular_hemoglobin_.MCH.__pg	0	49410	0.9594	0.94571	0.97328	1.57e-08	29.4346	2.48605	0.813755	0.757646	0.874011	16737	0.98472	0.9159	1.0587	0.677	28.9978	2.549	0.924507	0.639001	1.3375	18348	0.93691	0.91053	0.96406	7.78e-06	29.5039	2.40318	0.731095	0.637314	0.838684	7195	0.95601	0.92971	0.98305	0.00157	29.7298	2.44855	0.802273	0.699833	0.919691	7130	0.97253	0.95166	0.99385	0.0118	29.9839	2.41217	0.874242
PACK_YEARS__NA	1	9554	1.2535	1.1574	1.3576	2.81e-08	2.39922	1.35863	1.84771	1.48765	2.29497	2117	0.63428	0.38804	1.0368	0.0694	1.50765	1.30689	0.304237	0.0842201	1.09906	4375	1.3498	1.1594	1.5715	0.000111	2.48674	1.28574	2.16264	1.46277	3.19756	1841	1.2073	1.0492	1.3892	0.00851	2.85493	1.21592	1.58115	1.12389	2.22423	1221	1.203	1.0491	1.3795	0.00815	2.94439	1.14772	1.52846
Lymphoma	0	122250	1.5405	1.3105	1.8108	1.62e-07	0.00872802	0.0930156	1.0837	1.05159	1.11679	52954	6.6762	2.9549	15.084	4.99e-06	0.00230389	0.0479439	1.19967	1.10948	1.2972	42915	2.5918	1.9296	3.4814	2.51e-10	0.00943726	0.0966872	1.20221	1.13554	1.2728	13658	1.5846	1.1732	2.1404	0.00269	0.0187436	0.135623	1.133	1.04428	1.22926	12723	1.059	0.81215	1.3809	0.672	0.0223218	0.147734	1.01708
E869	0	122250	1.5894	1.3321	1.8965	2.72e-07	0.00663395	0.0811788	1.07813	1.04766	1.1095	52954	8.4452	3.9306	18.145	4.56e-08	0.00236054	0.0485285	1.23008	1.14208	1.32486	42915	2.9872	2.1498	4.1507	7.01e-11	0.00587207	0.076405	1.18202	1.12407	1.24295	13658	1.3971	0.97792	1.996	0.0662	0.0140577	0.117733	1.08192	0.994756	1.17673	12723	1.1111	0.84341	1.4637	0.454	0.0190207	0.136603	1.0292
Asian	0	122250	1.5969	1.3352	1.91	2.98e-07	0.030364	0.171588	1.17425	1.10429	1.24866	52954	0.7292	0.36036	1.4756	0.38	0.0374098	0.189766	0.887047	0.67884	1.15912	42915	1.3657	0.9933	1.8777	0.055	0.0284749	0.166327	1.10924	0.997766	1.23317	13658	1.3107	0.90107	1.9066	0.157	0.0208669	0.142944	1.08043	0.970658	1.2026	12723	2.7375	2.0385	3.6763	2.17e-11	0.0176059	0.131519	1.30329
Bilirubin.direct__mg_dl	1	10110	1.3535	1.2046	1.5208	3.58e-07	-1.7904	0.533541	1.38127	1.21974	1.56418	2955	1.2368	0.70892	2.1576	0.454	-1.88044	0.520713	1.2477	0.698889	2.22744	3788	1.2857	1.0266	1.6102	0.0287	-1.79047	0.531767	1.30637	1.02831	1.65968	1734	1.464	1.1739	1.8259	0.000718	-1.75481	0.528155	1.49581	1.18455	1.88886	1633	1.3373	1.11	1.6111	0.00223	-1.66512	0.537024	1.36639
AlbuminGlobulin__calc	0	1709	0.10953	0.046592	0.25749	3.96e-07	1.57648	0.289451	0.277963	0.169466	0.455919	483	NA	NA	NA	NA	NA	NA	NA	NA	NA	796	NA	NA	NA	NA	NA	NA	NA	NA	NA	256	NA	NA	NA	NA	NA	NA	NA	NA	NA	174	NA	NA	NA	NA	NA	NA	NA
Erythrocyte_distribution_width__fl	1	4902	9.1343	3.8817	21.495	4.06e-07	3.81485	0.118988	1.69285	1.38094	2.07522	1596	11.248	0.088636	1427.5	0.327	3.76787	0.107974	1.68648	0.592568	4.79982	1847	19.008	3.9222	92.113	0.000255	3.81187	0.112935	1.94478	1.36163	2.77766	789	NA	NA	NA	NA	NA	NA	NA	NA	NA	670	NA	NA	NA	NA	NA	NA	NA
Troponin.I_.TNI.__ng_ml	1	8159	1.1875	1.111	1.2692	4.2e-07	-3.89751	0.85504	1.34159	1.19722	1.5033	1472	1.6245	1.1029	2.3928	0.0141	-4.13898	0.750478	2.07146	1.15836	3.70443	2975	1.4069	1.2285	1.6112	8.03e-07	-3.96469	0.824847	1.7563	1.40424	2.19651	1615	1.2048	1.0556	1.3751	0.00574	-3.80661	0.872893	1.3844	1.09907	1.74382	2097	1.0735	0.9755	1.1814	0.146	-3.7027	0.898044	1.13587
Iron__ug_dl	1	7829	0.7356	0.65287	0.8288	4.54e-07	3.99233	0.624622	0.681397	0.587048	0.790904	2344	0.71601	0.43296	1.1841	0.193	4.05945	0.633874	0.654749	0.346025	1.2389	2841	0.60754	0.48224	0.76541	2.35e-05	4.04022	0.604072	0.547685	0.41432	0.723981	1330	0.62423	0.50139	0.77716	2.5e-05	3.92929	0.627086	0.553765	0.420696	0.728922	1314	0.95288	0.78577	1.1555	0.624	3.83286	0.615857	0.942278
INSURANCE_Medicaid	0	122250	1.3846	1.2194	1.572	5.11e-07	0.0769162	0.266459	1.18934	1.1115	1.2726	52954	1.7454	1.1462	2.6579	0.00944	0.109907	0.312776	1.41684	1.08911	1.8432	42915	1.6295	1.3355	1.9883	1.51e-06	0.0649656	0.246468	1.27213	1.15328	1.40324	13658	1.4112	1.0784	1.8466	0.0121	0.0327281	0.17793	1.1304	1.02722	1.24392	12723	1.1661	0.90591	1.5009	0.233	0.027352	0.163113	1.0514
Natriuretic_peptide.B_.BNP.__pg_ml	1	4425	1.1932	1.1131	1.2791	6.36e-07	4.62828	1.36186	1.61792	1.33889	1.95514	540	NA	NA	NA	NA	NA	NA	NA	NA	NA	1564	1.238	1.0897	1.4066	0.00104	4.24216	1.3781	1.80137	1.26714	2.56088	1013	1.1799	1.0365	1.3431	0.0123	4.86376	1.19594	1.48538	1.08953	2.02498	1308	1.0855	0.96574	1.2202	0.169	5.28516	0.982998	1.17512
Hypertension	0	122250	1.1738	1.1012	1.2513	8.78e-07	0.402438	0.490391	1.17023	1.09916	1.24592	52954	2.2601	1.7083	2.9901	1.13e-08	0.155135	0.362036	1.80473	1.47365	2.2102	42915	1.2229	1.093	1.3683	0.000446	0.501759	0.500003	1.22294	1.093	1.3683	13658	1.0805	0.95766	1.2191	0.209	0.704129	0.45645	1.07323	0.961275	1.19824	12723	0.97679	0.88033	1.0838	0.658	0.772852	0.419005	0.980516
INSURANCE_Medicare	0	122250	1.1965	1.1131	1.2861	1.12e-06	0.197153	0.397851	1.15345	1.089	1.22166	52954	4.5645	2.9614	7.0355	6.06e-12	0.0172603	0.130241	1.48511	1.32683	1.66228	42915	1.8009	1.5626	2.0755	4.49e-16	0.149435	0.356521	1.52117	1.37474	1.68315	13658	1.0813	0.94522	1.237	0.255	0.605726	0.488712	1.07942	0.946423	1.23107	12723	0.99723	0.89092	1.1162	0.962	0.668239	0.470864	0.997394
Natriuretic_peptide.proBNP_.NT.proBNP.__pg_ml	1	2897	1.1817	1.1028	1.2662	2.16e-06	6.1562	1.69706	1.76219	1.39392	2.22795	344	NA	NA	NA	NA	NA	NA	NA	NA	NA	983	NA	NA	NA	NA	NA	NA	NA	NA	NA	670	NA	NA	NA	NA	NA	NA	NA	NA	NA	900	NA	NA	NA	NA	NA	NA	NA
ALCOHOL__NA	0	39092	0.99994	0.99991	0.99996	2.98e-06	6223.44	2103.61	0.768065	0.684773	0.845107	15900	0.99991	0.99978	1	0.17	6352.21	2168.77	0.669158	0.385056	1	14285	0.99995	0.9999	1	0.0576	6171.74	2074.04	0.810734	0.660453	1	4704	0.99993	0.99988	0.99998	0.00762	6083.03	2006.75	0.760703	0.617764	0.922866	4203	0.99993	0.99989	0.99997	0.000818	6069.14	2030.49	0.755225
INSURANCE_Commercial	0	122250	0.81026	0.74052	0.88656	4.6e-06	0.338331	0.473144	0.819465	0.752565	0.892312	52954	0.78602	0.56944	1.085	0.143	0.40284	0.490474	0.789636	0.575582	1.08331	42915	0.74448	0.64214	0.86313	9.2e-05	0.396784	0.489236	0.749227	0.648292	0.865869	13658	1.0399	0.86174	1.2549	0.683	0.122126	0.327444	1.02596	0.907149	1.16032	12723	0.97609	0.83079	1.1468	0.768	0.104771	0.30627	0.985283
Glomerular_filtration_rate1.73_sq_M.predicted__ml_min_1.73m2	0	6048	0.98396	0.97706	0.9909	6.58e-06	84.6696	23.4354	0.468639	0.336976	0.6515	2012	1.0013	0.96231	1.0419	0.949	102.996	17.9769	1.04773	0.251252	4.37436	2655	0.97609	0.96482	0.98749	4.39e-05	82.1733	17.6952	0.4246	0.281546	0.640487	848	NA	NA	NA	NA	NA	NA	NA	NA	NA	533	NA	NA	NA	NA	NA	NA	NA
Potassium_.K.__mmol_l	1	53811	0.46095	0.32404	0.65571	1.65e-05	1.41889	0.0981314	0.85899	0.801583	0.920508	16838	9.4962	1.3579	66.411	0.0233	1.39956	0.0946278	1.53111	1.05961	2.21243	21235	0.51541	0.25219	1.0534	0.0692	1.42564	0.0977078	0.878518	0.763991	1.01022	8084	0.36045	0.18728	0.69374	0.00225	1.43139	0.101004	0.813729	0.712915	0.928796	7654	0.39654	0.23299	0.67489	0.000651	1.42948	0.0975707	0.834852
IMM_00006489700	0	122250	3.8758	2.0827	7.2126	1.91e-05	0.00303476	0.0550053	1.16072	1.08406	1.24279	52954	4.3726	0.58838	32.495	0.149	0.00643955	0.0799888	1.26621	0.918651	1.74525	42915	3.1893	1.0264	9.91	0.045	0.000466038	0.0215831	1.05134	1.00113	1.10407	13658	2.4317	0.60591	9.7593	0.21	0.000366086	0.0191306	1.03458	0.981013	1.09108	12723	6.8903	2.5718	18.46	0.000124	0.000392989	0.0198208	1.07952
Sodium_.Na.__mmol_l	0	53717	0.97508	0.96372	0.98658	2.45e-05	139.122	2.66869	0.873986	0.820994	0.930426	16831	0.86752	0.81055	0.9285	4.12e-05	138.717	2.3349	0.51497	0.37499	0.707209	21181	0.91656	0.89504	0.93859	6.56e-13	139.27	2.68494	0.626324	0.551315	0.71154	8065	0.97751	0.95513	1.0004	0.0543	139.385	2.82644	0.87934	0.771428	1.00226	7640	1.0148	0.99738	1.0325	0.0963	139.325	3.01856	1.09262
IMM_49281054505	0	122250	3.1167	1.8065	5.377	4.4e-05	0.00669121	0.081526	1.20364	1.10123	1.31558	52954	4.2003	1.3076	13.492	0.0159	0.0142765	0.11863	1.40565	1.0657	1.85405	42915	2.7104	1.2145	6.0488	0.0149	0.00109519	0.0330759	1.06818	1.01294	1.12644	13658	1.8378	0.45868	7.3637	0.39	0.000805389	0.028369	1.03513	0.956742	1.11995	12723	5.539	1.3787	22.254	0.0158	0.000314391	0.017729	1.06258
Osmolality__mOsm_kg	1	5102	126.08	12.073	1316.7	5.32e-05	5.65205	0.0382952	1.44841	1.2102	1.7335	1402	1254.3	0.017938	NA	0.21	5.64165	0.0340504	1.62557	0.760467	3.4748	2070	762.52	7.3234	79395	0.00511	5.65403	0.0372579	1.63973	1.15994	2.31799	857	NA	NA	NA	NA	NA	NA	NA	NA	NA	773	NA	NA	NA	NA	NA	NA	NA
South_South_Atl_West_South_Crl	0	122250	0.62865	0.50164	0.78782	5.55e-05	0.0800217	0.267126	0.780369	0.691726	0.880371	52954	1.7259	0.60324	4.9382	0.309	0.0831727	0.271536	1.345	0.75996	2.38044	42915	1.0869	0.68683	1.72	0.722	0.077196	0.263353	1.04487	0.820479	1.33062	13658	0.63038	0.41933	0.94765	0.0265	0.0815323	0.270371	0.77918	0.625029	0.971343	12723	0.35424	0.24724	0.50756	1.55e-08	0.0748167	0.257425	0.586082
Vitamin_D._25.OH.total_.VIT_D.__ng_ml	1	13033	0.72594	0.61988	0.85013	7.04e-05	3.30955	0.491056	0.730107	0.625206	0.852603	4078	0.5402	0.26837	1.0873	0.0845	3.12535	0.486149	0.549492	0.27833	1.08478	5439	0.71243	0.51533	0.98491	0.0402	3.34131	0.469094	0.72752	0.536886	0.985836	1918	0.655	0.48738	0.88027	0.00502	3.45176	0.46374	0.675408	0.513456	0.888449	1598	0.81878	0.64166	1.0448	0.108	3.50083	0.453831	0.834041
Drugs	0	122250	1.3084	1.1446	1.4956	8.19e-05	0.0373415	0.189598	1.10729	1.05255	1.1649	52954	1.5059	0.95412	2.3768	0.0787	0.0385807	0.192595	1.17081	0.982072	1.39582	42915	1.1791	0.96511	1.4406	0.107	0.0440638	0.205239	1.06998	0.985528	1.16166	13658	1.2607	0.9856	1.6125	0.0651	0.0331674	0.17908	1.0865	0.994818	1.18664	12723	1.0204	0.72293	1.4404	0.908	0.0139904	0.117455	1.00476
Protein.urine.concentration__mg_dl	1	2032	1.2631	1.1237	1.4199	9.06e-05	3.19861	1.17746	1.7334	1.31606	2.28325	644	NA	NA	NA	NA	NA	NA	NA	NA	NA	683	NA	NA	NA	NA	NA	NA	NA	NA	NA	392	NA	NA	NA	NA	NA	NA	NA	NA	NA	313	NA	NA	NA	NA	NA	NA	NA
BloodLoss	0	122250	1.2373	1.1116	1.3773	9.85e-05	0.0382822	0.191878	1.08515	1.04144	1.13071	52954	1.6078	0.9024	2.8645	0.107	0.0386373	0.192731	1.20086	0.961187	1.50029	42915	1.5744	1.2419	1.996	0.000177	0.0258651	0.158735	1.155	1.0712	1.24535	13658	1.4365	1.1809	1.7473	0.00029	0.0499341	0.217817	1.17091	1.07512	1.27522	12723	1.0354	0.8842	1.2123	0.666	0.0661794	0.248605	1.01742
Aspartate_aminotransferase_.AST.__u_l	1	46162	1.2132	1.1006	1.3374	0.000101	3.04943	0.386338	1.16106	1.07688	1.25187	14495	1.5411	0.95381	2.49	0.0773	3.02547	0.4004	1.41389	0.962838	2.07623	18431	1.1318	0.93521	1.3698	0.203	3.0803	0.380543	1.09884	0.950297	1.2706	6911	1.459	1.2114	1.7573	6.86e-05	3.04003	0.375836	1.32838	1.15506	1.52772	6325	1.1046	0.95067	1.2836	0.194	3.02464	0.375319	1.07757
Eosinophil.percent__.	1	43363	0.908	0.86477	0.95339	0.000105	0.672154	0.732483	0.868156	0.808279	0.932464	14303	1.075	0.82072	1.408	0.6	0.521958	0.755475	1.11541	0.741913	1.67699	16126	0.83551	0.75592	0.92348	0.000434	0.725413	0.69948	0.777701	0.676071	0.894611	6427	0.93795	0.8528	1.0316	0.187	0.78434	0.714163	0.912562	0.796576	1.04544	6507	0.91038	0.84731	0.97814	0.0104	0.759504	0.726771	0.872423
Estimated_average_glucose__mg_dl	1	2334	3.3518	1.7994	6.2435	0.000138	4.82911	0.246461	1.81519	1.33585	2.46652	622	NA	NA	NA	NA	NA	NA	NA	NA	NA	998	NA	NA	NA	NA	NA	NA	NA	NA	NA	401	NA	NA	NA	NA	NA	NA	NA	NA	NA	313	NA	NA	NA	NA	NA	NA	NA
Urobilinogen.urine.dipstick__mg_dl	1	5531	1.2445	1.1085	1.3971	0.00021	-1.10884	0.855672	1.45399	1.19277	1.77229	1872	0.97979	0.41578	2.3089	0.963	-1.13231	0.840456	0.966265	0.22874	4.08181	1956	1.254	0.99181	1.5856	0.0586	-1.13325	0.84187	1.46395	0.986249	2.17307	856	NA	NA	NA	NA	NA	NA	NA	NA	NA	847	NA	NA	NA	NA	NA	NA	NA
Albumin.urine.concentration__mg_dl	1	6159	1.2075	1.0915	1.3357	0.000252	0.430301	1.1009	1.51449	1.21261	1.89141	1083	1.8263	1.0544	3.1633	0.0316	0.363509	1.10918	3.80434	1.12469	12.8675	3191	1.181	0.97097	1.4364	0.0959	0.360207	1.08935	1.43676	0.937833	2.20117	1224	1.2704	1.0686	1.5103	0.0067	0.50917	1.08366	1.67985	1.15465	2.44393	661	NA	NA	NA	NA	NA	NA	NA
Troponin.T_.TNT.__ng_ml	1	2068	1.3391	1.1438	1.5679	0.000284	-3.82991	0.668378	1.47754	1.19674	1.82429	260	NA	NA	NA	NA	NA	NA	NA	NA	NA	767	NA	NA	NA	NA	NA	NA	NA	NA	NA	474	NA	NA	NA	NA	NA	NA	NA	NA	NA	567	NA	NA	NA	NA	NA	NA	NA
Pertussis	0	122250	6.1034	2.2877	16.283	0.000303	0.000204499	0.0142989	1.05309	1.02395	1.08306	52954	3.9485e-05	0	Inf	0.992	0.000151075	0.0122904	0.779393	0	NA	42915	4.4974	1.1186	18.082	0.0342	0.000326226	0.018059	1.05581	1.00406	1.11022	13658	10.725	2.6725	43.044	0.000818	0.000219651	0.0148196	1.07285	1.02956	1.11796	12723	NA	NA	NA	NA	0	0	1
Glomerular_filtration_rate1.73_sq_M.predicted.non_black__ml_min_1.73m2	0	1829	0.9845	0.9761	0.99299	0.00036	52.3072	25.7371	0.447608	0.287891	0.696209	234	NA	NA	NA	NA	NA	NA	NA	NA	NA	794	NA	NA	NA	NA	NA	NA	NA	NA	NA	417	NA	NA	NA	NA	NA	NA	NA	NA	NA	384	NA	NA	NA	NA	NA	NA	NA
Thyroxine.free_.FT4.__ng_dl	0	8760	0.54773	0.39164	0.76603	0.000436	1.11205	0.256548	0.734277	0.618175	0.872181	2734	0.18643	0.029869	1.1636	0.0722	1.08812	0.245341	0.438586	0.178574	1.07718	3488	0.45219	0.21028	0.97241	0.0422	1.10853	0.249511	0.672973	0.459263	0.986135	1356	0.67067	0.36218	1.2419	0.204	1.1397	0.276586	0.801736	0.570177	1.12732	1182	0.56663	0.34632	0.92707	0.0237	1.1461	0.271769	0.734357
Glomerular_filtration_rate1.73_sq_M.predicted.black__ml_min_1.73m2	0	1586	0.98602	0.97826	0.99385	0.000481	67.8639	35.0066	0.373303	0.214623	0.649268	232	NA	NA	NA	NA	NA	NA	NA	NA	NA	730	NA	NA	NA	NA	NA	NA	NA	NA	NA	340	NA	NA	NA	NA	NA	NA	NA	NA	NA	284	NA	NA	NA	NA	NA	NA	NA
HR__bpm	1	15552	2.0213	1.3552	3.0149	0.000561	4.351	0.170379	1.271	1.10913	1.45652	5547	13.273	1.1411	154.4	0.0389	4.40914	0.175242	2.47507	1.04735	5.84905	5751	4.323	1.8936	9.8694	0.000509	4.32902	0.157587	1.5863	1.22291	2.05767	2145	1.8514	0.87296	3.9264	0.108	4.30676	0.162038	1.22093	0.956924	1.55776	2109	1.3062	0.71262	2.3942	0.388	4.30303	0.156218	1.08704
HT__cm	0	61694	0.99133	0.98636	0.99633	0.000689	167.413	10.5686	0.831922	0.748042	0.925227	24297	0.96584	0.9443	0.98788	0.00253	167.21	10.7034	0.475231	0.293215	0.770254	23083	0.97488	0.96549	0.98437	2.65e-07	168.491	10.3262	0.591364	0.484179	0.722278	7754	0.99451	0.98495	1.0042	0.264	167.404	10.5131	0.890657	0.726985	1.09212	6560	1.0027	0.99501	1.0105	0.49	164.387	10.3415	1.05798
Albumincreatinine_ratio.urine__mg_g	1	5329	1.1815	1.0729	1.3012	0.000703	2.65116	1.27139	1.52836	1.19593	1.95322	928	NA	NA	NA	NA	NA	NA	NA	NA	NA	2760	1.1593	0.95829	1.4024	0.128	2.53397	1.25803	1.4504	0.898349	2.34174	1074	1.1788	1.005	1.3826	0.0433	2.83175	1.24899	1.50815	1.01254	2.24625	567	NA	NA	NA	NA	NA	NA	NA
WT__kg	0	65427	1.0032	1.0013	1.0051	0.00095	85.5371	24.4636	1.17062	1.06563	1.28261	26334	1.0088	1.0018	1.0159	0.0142	85.1872	27.1282	1.60727	1.10249	2.35347	24035	1.0028	0.9994	1.0061	0.108	89.6756	22.947	1.13482	0.972831	1.32194	8067	1.0034	0.9999	1.0069	0.0571	84.4562	21.1569	1.15445	0.995777	1.33772	6991	1.0004	0.99686	1.0039	0.827	73.8738	17.4758	1.01393
Triiodothyronine.total_.T3.__ng_dl	0	1147	0.98308	0.97309	0.99318	0.00106	100.264	28.6612	0.376064	0.209364	0.675517	425	NA	NA	NA	NA	NA	NA	NA	NA	NA	434	NA	NA	NA	NA	NA	NA	NA	NA	NA	168	NA	NA	NA	NA	NA	NA	NA	NA	NA	120	NA	NA	NA	NA	NA	NA	NA
Midwest_East_North_Central	0	122250	1.3658	1.1293	1.6518	0.00131	0.304055	0.452886	1.32626	1.11643	1.57551	52954	2.6409	1.06	6.5796	0.0371	0.292592	0.446912	2.38214	1.05346	5.38675	42915	1.7912	1.1929	2.6896	0.00495	0.306086	0.454961	1.69958	1.1741	2.46027	13658	1.2896	0.91476	1.8181	0.147	0.336279	0.466979	1.26813	0.920158	1.74772	12723	1.0294	0.7716	1.3733	0.844	0.310327	0.45337	1.0266
Fibrin_D.Dimer__NA	1	1688	1.0908	1.0339	1.1508	0.00148	2.64626	3.28511	1.76958	1.24488	2.51642	498	NA	NA	NA	NA	NA	NA	NA	NA	NA	659	NA	NA	NA	NA	NA	NA	NA	NA	NA	282	NA	NA	NA	NA	NA	NA	NA	NA	NA	249	NA	NA	NA	NA	NA	NA	NA
Herpes_Zoster	0	122250	0.79497	0.68939	0.91672	0.0016	0.0246217	0.15497	0.931355	0.891115	0.97341	52954	0.57614	0.143	2.3213	0.438	0.010613	0.102472	0.893146	0.67126	1.18838	42915	0.79794	0.57507	1.1072	0.177	0.0283118	0.165864	0.927858	0.832324	1.03436	13658	0.66343	0.48958	0.89902	0.00813	0.0398301	0.195567	0.851724	0.756274	0.959219	12723	0.85388	0.70786	1.03	0.0988	0.0541539	0.22633	0.930991
BMI__NA	1	64941	1.3287	1.1128	1.5866	0.00169	3.38677	0.244161	1.14888	1.05358	1.25283	26189	2.4158	1.1071	5.2715	0.0267	3.37938	0.270008	1.61012	1.05648	2.45389	23871	1.6114	1.1416	2.2745	0.00667	3.42588	0.222313	1.23631	1.06065	1.44106	7996	1.3762	0.98901	1.9151	0.0582	3.38008	0.221757	1.15216	0.995111	1.334	6885	0.9224	0.6923	1.229	0.581	3.28705	0.202576	0.967802
Partial_thromboplastin_time_.PTT.__sec	1	9135	1.413	1.1375	1.7552	0.00178	3.46764	0.233439	1.17516	1.062	1.30038	1746	1.2396	0.34123	4.503	0.744	3.43344	0.208757	1.09381	0.638324	1.87433	3452	1.2868	0.81296	2.0368	0.282	3.4681	0.223645	1.11939	0.911538	1.37464	1935	1.6096	1.0884	2.3804	0.0171	3.48258	0.249371	1.26794	1.04315	1.54117	2002	1.3799	0.99133	1.9208	0.0563	3.48222	0.250859	1.17534
Monocyte.percent__.	0	45076	0.97809	0.96423	0.99215	0.00235	8.24585	2.44987	0.897144	0.836545	0.962121	14945	0.97975	0.89649	1.0707	0.652	7.63236	2.27541	0.911105	0.608196	1.36462	16715	0.98943	0.95956	1.0202	0.497	8.26723	2.33297	0.951646	0.824802	1.09781	6681	0.97301	0.94638	1.0004	0.0533	8.71291	2.54199	0.870153	0.755645	1.00204	6735	0.97511	0.95542	0.9952	0.0154	9.09083	2.64546	0.87514
Ethanol.concentration__mg_dl	1	1650	0.78	0.66362	0.91677	0.00258	2.87453	1.38806	0.501689	0.320351	0.785652	562	NA	NA	NA	NA	NA	NA	NA	NA	NA	651	NA	NA	NA	NA	NA	NA	NA	NA	NA	261	NA	NA	NA	NA	NA	NA	NA	NA	NA	176	NA	NA	NA	NA	NA	NA	NA
Creatinine.urine.concentration__mg_dl	1	10377	0.85067	0.76479	0.94621	0.0029	4.55486	0.690242	0.799906	0.690608	0.926512	2402	0.64305	0.40442	1.0225	0.062	4.6338	0.741552	0.519526	0.261151	1.03355	4780	0.74199	0.61852	0.8901	0.00131	4.57645	0.689578	0.662607	0.515518	0.851664	1963	1.0406	0.84929	1.2751	0.701	4.51558	0.62312	1.0509	0.815806	1.35373	1232	0.85692	0.71315	1.0297	0.0994	4.3798	0.65671	0.816437
Caucasian	0	122250	1.1434	1.044	1.2524	0.00388	0.532843	0.498922	1.14312	1.0439	1.25179	52954	0.6188	0.44165	0.867	0.00528	0.450259	0.497524	0.620272	0.443441	0.867613	42915	0.97869	0.8366	1.1449	0.788	0.544239	0.498045	0.978775	0.837184	1.14429	13658	1.1361	0.9524	1.3553	0.156	0.626666	0.483707	1.13142	0.953915	1.34194	12723	1.5476	1.3058	1.8342	4.72e-07	0.737405	0.440062	1.46865
IMM_00006494300	0	122250	0.91216	0.85567	0.97237	0.00482	0.129857	0.336147	0.94006	0.900513	0.981339	52954	1.5993	1.0547	2.4251	0.027	0.0404313	0.19697	1.20321	1.0212	1.41762	42915	0.9916	0.86497	1.1368	0.904	0.144611	0.351713	0.994083	0.902994	1.09438	13658	0.72153	0.64232	0.81051	3.78e-08	0.32135	0.467012	0.737238	0.661356	0.821823	12723	0.91777	0.83432	1.0096	0.0777	0.246719	0.431118	0.928682
Cholesterol.totalHDL_ratio__no_units	1	23392	1.3536	1.0947	1.6737	0.00518	1.24708	0.305179	1.20296	1.05678	1.36938	6702	2.2986	0.70239	7.522	0.169	1.28697	0.313597	1.6854	0.801263	3.54512	10550	1.8149	1.1962	2.7535	0.00507	1.26948	0.297344	1.42539	1.11242	1.82639	3558	1.2528	0.83813	1.8726	0.272	1.18159	0.293442	1.14142	0.901556	1.44509	2582	1.1169	0.80527	1.5491	0.508	1.14222	0.292576	1.06682
Procalcitonin_.PCT.__ng_ml	1	2481	1.1092	1.0282	1.1966	0.00739	-1.87323	1.22647	1.28947	1.0706	1.55312	344	NA	NA	NA	NA	NA	NA	NA	NA	NA	874	NA	NA	NA	NA	NA	NA	NA	NA	NA	625	NA	NA	NA	NA	NA	NA	NA	NA	NA	638	NA	NA	NA	NA	NA	NA	NA
Testosterone.total__ng_dl	0	1496	0.997	0.9948	0.9992	0.00765	286.335	237.605	0.23979	0.0839496	0.683643	656	NA	NA	NA	NA	NA	NA	NA	NA	NA	639	NA	NA	NA	NA	NA	NA	NA	NA	NA	145	NA	NA	NA	NA	NA	NA	NA	NA	NA	56	NA	NA	NA	NA	NA	NA	NA
Prothrombin_time_.PT.__sec	1	12448	1.2642	1.0635	1.5029	0.00788	2.61939	0.263074	1.13129	1.03292	1.23906	2390	2.7423	1.0571	7.1139	0.0381	2.54263	0.196547	1.48668	1.02207	2.16251	4613	1.7202	1.1908	2.485	0.00384	2.59672	0.240633	1.29832	1.08767	1.54973	2599	1.2545	0.89973	1.7492	0.181	2.65053	0.276269	1.13348	0.94329	1.362	2846	1.077	0.84098	1.3792	0.557	2.69218	0.307915	1.04674
West_Mountain	0	122250	0.62035	0.43609	0.88245	0.00792	0.0143302	0.117007	0.89428	0.823485	0.97116	52954	1.3589	0.2644	6.984	0.713	0.0135786	0.113621	1.07217	0.739117	1.55531	42915	0.89458	0.45596	1.7552	0.746	0.0154665	0.121926	0.973201	0.825712	1.14704	13658	0.63084	0.33897	1.174	0.146	0.0155045	0.122154	0.893551	0.76774	1.03997	12723	0.39757	0.21858	0.72314	0.00251	0.0123656	0.107916	0.819483
Platelet_count_.PLT.__x10.3_ul	0	50511	0.99931	0.99879	0.99982	0.0082	247.245	73.6324	0.90271	0.836693	0.973838	17102	0.99677	0.99403	0.99952	0.0215	267.445	71.8073	0.628394	0.423184	0.933372	18772	0.99852	0.99748	0.99957	0.00575	245.63	71.3811	0.809951	0.697527	0.940446	7324	0.99979	0.99882	1.0008	0.67	229.921	73.0674	0.969542	0.841524	1.12396	7313	0.99972	0.99895	1.0005	0.465	221.5	71.0024	0.960359
Parathyroid_hormone_.PTH.__pg_ml	1	2659	1.1916	1.0441	1.36	0.00931	4.42098	0.928309	1.38474	1.08342	1.76983	414	NA	NA	NA	NA	NA	NA	NA	NA	NA	1081	1.227	0.95112	1.583	0.115	4.4357	0.955986	1.47871	0.908629	2.40659	657	NA	NA	NA	NA	NA	NA	NA	NA	NA	507	NA	NA	NA	NA	NA	NA	NA
Cancer	0	122250	1.094	1.0223	1.1707	0.00935	0.0891288	0.284931	1.05253	1.01265	1.09397	52954	2.8678	1.8349	4.4822	3.76e-06	0.0273634	0.163141	1.41023	1.21902	1.63144	42915	1.3038	1.1274	1.5077	0.000346	0.0992893	0.299054	1.17194	1.07436	1.27835	13658	1.0851	0.95857	1.2284	0.197	0.189413	0.391851	1.06613	0.967383	1.17494	12723	0.97839	0.88603	1.0804	0.666	0.204276	0.403187	0.982536
Cholesterol.in_VLDL__mg_dl	1	4665	1.6842	1.1177	2.5377	0.0127	3.07943	0.489547	1.66591	1.1151	2.48877	1472	4.223	0.67919	26.257	0.122	2.9966	0.529675	4.5999	0.663774	31.8769	2166	2.6777	1.1788	6.0826	0.0186	3.12626	0.479003	2.56919	1.17069	5.63848	650	NA	NA	NA	NA	NA	NA	NA	NA	NA	377	NA	NA	NA	NA	NA	NA	NA
Transferrin_saturation__.	1	6870	0.85217	0.74918	0.96932	0.0149	2.88872	0.639181	0.815058	0.691315	0.960949	2050	1.365	0.82084	2.2699	0.23	2.82987	0.7011	1.54699	0.758182	3.15641	2475	0.76351	0.58912	0.98951	0.0414	2.94181	0.601496	0.72281	0.529124	0.987394	1197	0.7279	0.56715	0.93421	0.0126	2.92932	0.593608	0.685881	0.510019	0.922383	1148	0.92159	0.75218	1.1291	0.431	2.83703	0.635715	0.901383
Chloride_.Cl.__mmol_l	0	53593	1.0109	1.0019	1.02	0.0174	103.387	3.56329	1.08059	1.01362	1.15157	16784	0.97292	0.92138	1.0273	0.323	103.557	3.1364	0.841788	0.598317	1.18406	21120	0.97181	0.95412	0.98982	0.00228	103.148	3.55795	0.81588	0.715908	0.929777	8052	1.0272	1.0091	1.0456	0.00306	103.362	3.8239	1.22807	1.07174	1.40638	7637	1.0285	1.0154	1.0419	1.9e-05	103.7	4.09178	1.25887
Self_Monitored_Blood_Glucose_.SMBG.__NA	0	1370	1.3003	1.0471	1.6147	0.0175	3.29263	1.01472	1.70393	1.0979	2.64429	325	NA	NA	NA	NA	NA	NA	NA	NA	NA	652	NA	NA	NA	NA	NA	NA	NA	NA	NA	261	NA	NA	NA	NA	NA	NA	NA	NA	NA	132	NA	NA	NA	NA	NA	NA	NA
Granulocytes.immature100_leukocytes__.	1	1965	1.9412	1.1169	3.3738	0.0187	0.0263474	0.253959	1.40061	1.05776	1.85456	483	NA	NA	NA	NA	NA	NA	NA	NA	NA	728	NA	NA	NA	NA	NA	NA	NA	NA	NA	378	NA	NA	NA	NA	NA	NA	NA	NA	NA	376	NA	NA	NA	NA	NA	NA	NA
Oxygen_saturation_.SO2..other.performed__.	0	4205	1.0041	1.0006	1.0076	0.0202	67.7902	23.9142	1.21564	1.0291	1.43637	873	NA	NA	NA	NA	NA	NA	NA	NA	NA	1659	1.0045	0.99814	1.011	0.165	67.4849	24.283	1.24577	0.91355	1.70116	871	NA	NA	NA	NA	NA	NA	NA	NA	NA	802	NA	NA	NA	NA	NA	NA	NA
Granulocytes.immature__x10.3_ul	0	1631	53.507	1.8251	1568.7	0.0209	0.105141	0.0397671	1.37236	1.04901	1.79537	428	NA	NA	NA	NA	NA	NA	NA	NA	NA	588	NA	NA	NA	NA	NA	NA	NA	NA	NA	303	NA	NA	NA	NA	NA	NA	NA	NA	NA	312	NA	NA	NA	NA	NA	NA	NA
Basophil.absolute__x10.3_ul	1	33620	1.0776	1.0101	1.1497	0.0235	-2.98162	0.637258	1.09999	1.01289	1.19458	10505	1.4146	0.98163	2.0384	0.0628	-3.0353	0.642926	1.56198	0.976441	2.49862	12727	1.0095	0.88472	1.1519	0.888	-2.96437	0.623769	1.01185	0.858298	1.19294	5150	1.2018	1.0589	1.3639	0.00443	-2.96734	0.642616	1.26644	1.07633	1.49014	5238	1.0086	0.91622	1.1103	0.861	-2.92991	0.645749	1.01115
UROUT__ml	0	9340	0.99961	0.99927	0.99995	0.0247	287.565	194.408	0.860177	0.752812	0.980746	2027	0.99814	0.99653	0.99976	0.0244	321.774	222.414	0.43773	0.213048	0.898731	3324	1	0.9994	1.0006	0.963	300.917	199.718	1.00577	0.786838	1.27073	1842	0.99956	0.9989	1.0002	0.186	269.231	178.778	0.853293	0.674672	1.07412	2147	0.99948	0.99893	1	0.0643	250.326	159.791	0.846678
Alcohol	0	122250	1.1597	1.0189	1.3199	0.0248	0.0314192	0.174449	1.05304	1.00655	1.10168	52954	1.7006	1.0159	2.8467	0.0434	0.0236432	0.151936	1.1751	1.00481	1.37424	42915	1.3159	1.0794	1.6042	0.0066	0.0421065	0.200834	1.11658	1.03117	1.20905	13658	1.0635	0.8378	1.3501	0.613	0.0378533	0.190848	1.02379	0.93468	1.1214	12723	0.78424	0.58669	1.0483	0.101	0.0208284	0.142815	0.932935
Metamyelocyte.percent__.	1	1579	0.73754	0.56404	0.96442	0.0261	0.425923	0.513826	0.731359	0.555179	0.963454	325	NA	NA	NA	NA	NA	NA	NA	NA	NA	610	NA	NA	NA	NA	NA	NA	NA	NA	NA	316	NA	NA	NA	NA	NA	NA	NA	NA	NA	328	NA	NA	NA	NA	NA	NA	NA
Reticulocyte.percent__.	1	1470	1.311	1.0321	1.6653	0.0265	0.589842	0.599076	1.38326	1.03858	1.84239	325	NA	NA	NA	NA	NA	NA	NA	NA	NA	503	NA	NA	NA	NA	NA	NA	NA	NA	NA	325	NA	NA	NA	NA	NA	NA	NA	NA	NA	317	NA	NA	NA	NA	NA	NA	NA
Lactic_acid__mmol_l	1	8392	1.1687	1.0136	1.3476	0.0319	0.341451	0.407786	1.1356	1.01108	1.27546	1636	3.0795	1.4507	6.5368	0.0034	0.281629	0.421667	2.58195	1.36856	4.87108	3029	1.1188	0.85497	1.464	0.413	0.336675	0.415638	1.09779	0.877874	1.37281	1761	1.2191	0.93114	1.596	0.15	0.358453	0.400339	1.17188	0.944476	1.454	1966	1.1437	0.91122	1.4356	0.247	0.383362	0.383873	1.10861
LVEF__.	0	7948	0.99499	0.99012	0.99987	0.0443	55.3693	12.8369	0.878909	0.774979	0.996668	871	NA	NA	NA	NA	NA	NA	NA	NA	NA	3172	0.99887	0.98899	1.0088	0.823	55.4536	13.0613	0.970859	0.748859	1.25718	1871	0.99311	0.98363	1.0027	0.158	55.1737	12.8197	0.837623	0.654955	1.07158	2034	0.99555	0.98819	1.003	0.238	55.0527	12.4207	0.895049
Anion_gap__mmol_l	0	40495	1.0129	1.0002	1.0257	0.0459	9.85422	3.25602	1.08702	1.0013	1.17968	12393	1.0717	1.006	1.1417	0.0318	10.032	3.36453	1.59371	1.04107	2.43933	15355	1.0186	0.99431	1.0436	0.134	9.84361	3.27271	1.12849	0.963339	1.32225	6262	0.99692	0.9733	1.0211	0.801	9.79801	3.17451	0.980581	0.842128	1.14176	6485	1.0108	0.99114	1.0309	0.283	9.59379	3.05777	1.06817
Protein.urine.dipstick__mg_dl	1	4783	1.1378	1.0014	1.2928	0.0476	3.82627	0.622443	1.17433	1.00174	1.37671	1380	2.2125	1.1403	4.2929	0.0189	3.75272	0.589199	2.54919	1.16732	5.56715	1452	1.2681	0.96034	1.6744	0.094	3.87801	0.622597	1.34412	0.950858	1.89998	879	NA	NA	NA	NA	NA	NA	NA	NA	NA	1072	1.0432	0.86079	1.2643	0.666	3.81082	0.651728	1.05671
Northeast_New_England	0	122250	1.2135	0.997	1.4771	0.0536	0.12952	0.330574	1.13651	0.998016	1.29421	52954	2.2806	0.86858	5.9878	0.0941	0.127267	0.327421	1.71577	0.911864	3.2284	42915	1.5654	1.0236	2.3938	0.0387	0.119778	0.320231	1.33243	1.01505	1.74901	13658	1.321	0.92422	1.8881	0.127	0.121029	0.321943	1.19632	0.950524	1.50567	12723	0.86218	0.64179	1.1582	0.325	0.18087	0.378996	0.893683
Immunoglobulin_M_.IgM..quantitative__mg_dl	1	1022	0.82003	0.6693	1.0047	0.0555	4.16149	0.802933	0.727144	0.524772	1.00756	210	NA	NA	NA	NA	NA	NA	NA	NA	NA	428	NA	NA	NA	NA	NA	NA	NA	NA	NA	220	NA	NA	NA	NA	NA	NA	NA	NA	NA	164	NA	NA	NA	NA	NA	NA	NA
Phosphorus_.PO4.__mg_dl	1	9158	1.242	0.98909	1.5595	0.0621	1.22549	0.247234	1.1131	0.99459	1.24573	1517	5.8542	2.1355	16.048	0.000593	1.24362	0.27832	2.67426	1.5255	4.68797	3538	1.4639	0.97895	2.189	0.0634	1.24022	0.255026	1.21455	0.989207	1.49122	2046	0.8603	0.5653	1.3093	0.482	1.21724	0.236743	0.931233	0.763322	1.1361	2057	1.1174	0.75321	1.6578	0.581	1.19498	0.214175	1.04871
Oxygen_saturation_.SO2..other.performed__mm_Hg	1	3742	1.2458	0.98884	1.5694	0.0622	3.72312	0.375866	1.17961	0.991599	1.40326	811	NA	NA	NA	NA	NA	NA	NA	NA	NA	1475	1.2226	0.7886	1.8954	0.369	3.7392	0.365691	1.15834	0.840549	1.59627	749	NA	NA	NA	NA	NA	NA	NA	NA	NA	707	NA	NA	NA	NA	NA	NA	NA
Glucose.urine.dipstick__mg_dl	1	1484	1.1825	0.99128	1.4106	0.0625	5.09104	0.859941	1.33415	0.98505	1.807	375	NA	NA	NA	NA	NA	NA	NA	NA	NA	588	NA	NA	NA	NA	NA	NA	NA	NA	NA	290	NA	NA	NA	NA	NA	NA	NA	NA	NA	231	NA	NA	NA	NA	NA	NA	NA
Hepatitis_C_antibody_sco_ratio_.HCV..quantitative__no_units	1	1190	1.3593	0.98334	1.8791	0.0631	-3.34742	0.97892	1.82404	0.967643	3.43835	534	NA	NA	NA	NA	NA	NA	NA	NA	NA	509	NA	NA	NA	NA	NA	NA	NA	NA	NA	116	NA	NA	NA	NA	NA	NA	NA	NA	NA	31	NA	NA	NA	NA	NA	NA	NA
Vancomycin.trough__ug_ml	0	1380	1.0198	0.99857	1.0415	0.0678	15.4499	6.1519	1.27281	0.982547	1.64921	219	NA	NA	NA	NA	NA	NA	NA	NA	NA	586	NA	NA	NA	NA	NA	NA	NA	NA	NA	330	NA	NA	NA	NA	NA	NA	NA	NA	NA	245	NA	NA	NA	NA	NA	NA	NA
Gamma.glutamyl_transferase_.GGT.__u_l	1	1574	1.1675	0.98748	1.3802	0.0699	3.52447	0.963712	1.34773	0.976009	1.86092	538	NA	NA	NA	NA	NA	NA	NA	NA	NA	656	NA	NA	NA	NA	NA	NA	NA	NA	NA	200	NA	NA	NA	NA	NA	NA	NA	NA	NA	180	NA	NA	NA	NA	NA	NA	NA
Triiodothyronine.free_.FT3.__pg_ml	0	1772	0.69196	0.46106	1.0385	0.0755	2.8955	0.567752	0.658284	0.41514	1.04383	564	NA	NA	NA	NA	NA	NA	NA	NA	NA	752	NA	NA	NA	NA	NA	NA	NA	NA	NA	269	NA	NA	NA	NA	NA	NA	NA	NA	NA	187	NA	NA	NA	NA	NA	NA	NA
Sodium_.Na..urine.concentration__mmol_l	1	1507	0.85939	0.72659	1.0165	0.0768	3.84142	0.710431	0.806288	0.635201	1.02353	168	NA	NA	NA	NA	NA	NA	NA	NA	NA	616	NA	NA	NA	NA	NA	NA	NA	NA	NA	373	NA	NA	NA	NA	NA	NA	NA	NA	NA	350	NA	NA	NA	NA	NA	NA	NA
Carbon_dioxide__mm_Hg	1	1180	0.48571	0.21709	1.0867	0.0788	3.7046	0.192408	0.757377	0.555557	1.03251	251	NA	NA	NA	NA	NA	NA	NA	NA	NA	453	NA	NA	NA	NA	NA	NA	NA	NA	NA	224	NA	NA	NA	NA	NA	NA	NA	NA	NA	252	NA	NA	NA	NA	NA	NA	NA
Epithelial_cells.urine.microscopic__NA	1	1161	1.2294	0.97468	1.5508	0.0812	0.935785	0.994489	1.50808	0.95027	2.39338	311	NA	NA	NA	NA	NA	NA	NA	NA	NA	364	NA	NA	NA	NA	NA	NA	NA	NA	NA	181	NA	NA	NA	NA	NA	NA	NA	NA	NA	305	NA	NA	NA	NA	NA	NA	NA
Human_chorionic_gonadotropin_.HCG..quantitative__u_l	1	1912	0.73559	0.51568	1.0493	0.0902	3.17116	3.77982	0.0981339	0.00669418	1.43878	1746	0.80543	0.57075	1.1366	0.218	3.38867	3.87767	0.186723	0.0129168	2.69933	152	NA	NA	NA	NA	NA	NA	NA	NA	NA	9	NA	NA	NA	NA	NA	NA	NA	NA	NA	5	NA	NA	NA	NA	NA	NA	NA
Red_blood_cells_.RBC..urine.microscopic__NA	1	1399	1.1596	0.97513	1.3791	0.0939	0.956611	0.873318	1.29525	0.956965	1.75317	365	NA	NA	NA	NA	NA	NA	NA	NA	NA	441	NA	NA	NA	NA	NA	NA	NA	NA	NA	236	NA	NA	NA	NA	NA	NA	NA	NA	NA	357	NA	NA	NA	NA	NA	NA	NA
Magnesium_.Mg.__mg_dl	0	13910	1.1652	0.96896	1.4012	0.104	1.97188	0.252419	1.08024	0.984207	1.18566	2651	1.7647	0.61834	5.0363	0.288	1.96629	0.232924	1.3029	0.799363	2.12362	5244	1.3321	0.9394	1.889	0.108	1.97637	0.25934	1.16036	0.968095	1.39084	2860	0.81268	0.57274	1.1531	0.245	1.96059	0.256077	0.899216	0.751687	1.07569	3155	1.3464	1.0116	1.792	0.0414	1.97933	0.252829	1.16231
Acetaminophen__ug_ml	1	1037	0.75869	0.54227	1.0615	0.107	1.48635	0.791248	0.645955	0.379662	1.09905	432	NA	NA	NA	NA	NA	NA	NA	NA	NA	398	NA	NA	NA	NA	NA	NA	NA	NA	NA	126	NA	NA	NA	NA	NA	NA	NA	NA	NA	81	NA	NA	NA	NA	NA	NA	NA
Bands.percent__.	1	2881	1.0877	0.97834	1.2094	0.12	1.065	0.861681	1.15597	0.962965	1.38771	614	NA	NA	NA	NA	NA	NA	NA	NA	NA	1064	1.0866	0.8961	1.3175	0.398	1.0836	0.859677	1.15346	0.828102	1.60655	566	NA	NA	NA	NA	NA	NA	NA	NA	NA	637	NA	NA	NA	NA	NA	NA	NA
pH__no_units	0	1103	7.4247	0.57912	95.19	0.123	7.39854	0.060096	1.27247	0.936454	1.72906	244	NA	NA	NA	NA	NA	NA	NA	NA	NA	411	NA	NA	NA	NA	NA	NA	NA	NA	NA	207	NA	NA	NA	NA	NA	NA	NA	NA	NA	241	NA	NA	NA	NA	NA	NA	NA
Hypothyroid	0	122250	1.0537	0.98581	1.1262	0.124	0.123027	0.328469	1.03495	0.990655	1.08121	52954	2.7983	1.9244	4.069	7.17e-08	0.0536503	0.225329	1.58998	1.34314	1.88222	42915	1.214	1.0469	1.4079	0.0103	0.133566	0.34019	1.14107	1.03168	1.26208	13658	1.0547	0.92742	1.1994	0.417	0.206472	0.404788	1.04404	0.940823	1.15858	12723	0.94439	0.86021	1.0368	0.23	0.286646	0.452213	0.94957
Transferrin.direct__mg_dl	0	1649	0.99817	0.99581	1.0005	0.129	236.764	71.6629	0.768892	0.547826	1.07427	455	NA	NA	NA	NA	NA	NA	NA	NA	NA	573	NA	NA	NA	NA	NA	NA	NA	NA	NA	282	NA	NA	NA	NA	NA	NA	NA	NA	NA	339	NA	NA	NA	NA	NA	NA	NA
Ketones.urine.dipstick__mg_dl	1	1501	0.84722	0.68195	1.0525	0.134	2.76836	0.791529	0.769155	0.545532	1.08437	631	NA	NA	NA	NA	NA	NA	NA	NA	NA	415	NA	NA	NA	NA	NA	NA	NA	NA	NA	230	NA	NA	NA	NA	NA	NA	NA	NA	NA	225	NA	NA	NA	NA	NA	NA	NA
Immunoglobulin_A_.IgA..quantitative__mg_dl	0	1599	0.99911	0.99793	1.0003	0.137	223.28	136.306	0.783713	0.568422	1.08521	521	NA	NA	NA	NA	NA	NA	NA	NA	NA	618	NA	NA	NA	NA	NA	NA	NA	NA	NA	270	NA	NA	NA	NA	NA	NA	NA	NA	NA	190	NA	NA	NA	NA	NA	NA	NA
Cholesterol.non.HDL__mg_dl	1	15193	0.84293	0.6719	1.0575	0.14	4.79286	0.32877	0.89373	0.76992	1.03745	4350	1.0175	0.2567	4.0333	0.98	4.84388	0.298376	1.01042	0.444195	2.29842	6836	0.47058	0.31337	0.70665	0.000279	4.83265	0.323527	0.61401	0.471978	0.79878	2334	1.1153	0.72666	1.7117	0.618	4.695	0.334296	1.07568	0.807769	1.43241	1673	1.1865	0.82947	1.6971	0.349	4.63412	0.338975	1.12289
PUD	0	122250	1.0921	0.97068	1.2287	0.143	0.0263231	0.160095	1.02861	0.990517	1.06817	52954	2.5389	1.3377	4.8189	0.00437	0.0105941	0.102382	1.2102	1.06139	1.37989	42915	1.197	0.93369	1.5346	0.156	0.0297099	0.169788	1.06297	0.976971	1.15654	13658	1.1	0.8875	1.3634	0.384	0.0511788	0.22037	1.0429	0.948759	1.14639	12723	0.94248	0.78894	1.1259	0.514	0.0536823	0.225399	0.973647
Rheumatoid_factor_.RF..quantitative__u_ml	1	1478	1.7086	0.83316	3.5038	0.144	2.51537	0.341638	1.44197	0.882746	2.35543	563	NA	NA	NA	NA	NA	NA	NA	NA	NA	639	NA	NA	NA	NA	NA	NA	NA	NA	NA	185	NA	NA	NA	NA	NA	NA	NA	NA	NA	91	NA	NA	NA	NA	NA	NA	NA
Thyroxine.total_.T4.__ug_dl	0	1611	0.89864	0.77625	1.0403	0.153	7.42101	1.93823	0.660807	0.374624	1.16551	479	NA	NA	NA	NA	NA	NA	NA	NA	NA	652	NA	NA	NA	NA	NA	NA	NA	NA	NA	275	NA	NA	NA	NA	NA	NA	NA	NA	NA	205	NA	NA	NA	NA	NA	NA	NA
PH.arterial_blood__no_units	0	2682	0.38559	0.10348	1.4368	0.156	7.38708	0.0692749	0.87631	0.730312	1.0515	395	NA	NA	NA	NA	NA	NA	NA	NA	NA	1111	0.27215	0.025053	2.9563	0.285	7.38596	0.0681924	0.837367	0.604824	1.15932	647	NA	NA	NA	NA	NA	NA	NA	NA	NA	529	NA	NA	NA	NA	NA	NA	NA
Immunoglobulin_G_.IgG..quantitative__mg_dl	1	1228	0.80799	0.59804	1.0916	0.165	6.93099	0.462167	0.821129	0.621762	1.08438	289	NA	NA	NA	NA	NA	NA	NA	NA	NA	506	NA	NA	NA	NA	NA	NA	NA	NA	NA	249	NA	NA	NA	NA	NA	NA	NA	NA	NA	184	NA	NA	NA	NA	NA	NA	NA
FEV1_FVC_RATIO__.	0	1004	0.99166	0.97966	1.0038	0.178	67.6975	18.6208	0.732041	0.465193	1.15171	140	NA	NA	NA	NA	NA	NA	NA	NA	NA	474	NA	NA	NA	NA	NA	NA	NA	NA	NA	256	NA	NA	NA	NA	NA	NA	NA	NA	NA	134	NA	NA	NA	NA	NA	NA	NA
Uric_acid__mg_dl	1	3859	1.2589	0.89602	1.7687	0.184	1.72041	0.350871	1.17534	0.925847	1.49207	913	NA	NA	NA	NA	NA	NA	NA	NA	NA	1641	0.77317	0.38639	1.5471	0.467	1.75216	0.320261	0.848083	0.543852	1.32248	727	NA	NA	NA	NA	NA	NA	NA	NA	NA	578	NA	NA	NA	NA	NA	NA	NA
Platelet_mean_volume_.MPV.__fl	0	36567	0.97919	0.94891	1.0104	0.189	9.77663	1.33631	0.945344	0.869223	1.02804	12665	1.0207	0.85062	1.2247	0.826	9.78198	1.32456	1.05565	0.65142	1.71081	13091	0.91629	0.85853	0.97794	0.0085	9.79528	1.32731	0.792882	0.66703	0.942503	5292	0.98064	0.92097	1.0442	0.542	9.80324	1.33404	0.94917	0.802794	1.12232	5519	1.0078	0.96301	1.0547	0.737	9.69456	1.38305	1.02176
Midwest_West_North_Central	0	122250	0.86955	0.70431	1.0735	0.194	0.092656	0.28546	0.923297	0.818626	1.04132	52954	3.2005	1.2249	8.3621	0.0176	0.101018	0.296532	1.99354	1.12784	3.52364	42915	1.3593	0.87327	2.1159	0.174	0.0864677	0.277203	1.18553	0.927625	1.51515	13658	0.91045	0.61832	1.3406	0.635	0.0792773	0.266371	0.951249	0.774053	1.16901	12723	0.52862	0.38276	0.73006	0.000109	0.093088	0.284696	0.6956
Oxygen_saturation_.SO2..arterial_blood__.	0	2239	0.98096	0.95059	1.0123	0.231	95.5813	3.11679	0.88708	0.729153	1.07918	304	NA	NA	NA	NA	NA	NA	NA	NA	NA	960	NA	NA	NA	NA	NA	NA	NA	NA	NA	529	NA	NA	NA	NA	NA	NA	NA	NA	NA	446	NA	NA	NA	NA	NA	NA	NA
Basophil.percent__.	0	40458	0.93663	0.83769	1.0473	0.25	0.7372	0.344147	0.955943	0.885235	1.03232	13109	1.3638	0.78079	2.3821	0.276	0.69406	0.347632	1.24076	0.841943	1.82847	15209	0.74129	0.587	0.93614	0.0119	0.765156	0.34107	0.815296	0.69531	0.955984	6059	0.97429	0.78249	1.2131	0.816	0.74533	0.333891	0.982758	0.848921	1.13769	6081	1.0166	0.86246	1.1983	0.845	0.752181	0.345314	1.01143
Casts.urine.microscopic___lpf	1	1847	0.91032	0.77567	1.0683	0.25	1.00952	0.81824	0.857477	0.659871	1.11418	441	NA	NA	NA	NA	NA	NA	NA	NA	NA	612	NA	NA	NA	NA	NA	NA	NA	NA	NA	371	NA	NA	NA	NA	NA	NA	NA	NA	NA	423	NA	NA	NA	NA	NA	NA	NA
Rheumatic	0	122250	1.073	0.95077	1.211	0.253	0.0309121	0.17308	1.0247	0.982677	1.06852	52954	2.1553	1.1289	4.1152	0.0199	0.0138422	0.116837	1.19656	1.02874	1.39177	42915	1.248	0.97094	1.6041	0.0837	0.036817	0.188314	1.08702	0.988954	1.1948	13658	0.77356	0.59655	1.0031	0.0528	0.0525699	0.223181	0.891721	0.794067	1.00138	12723	1.0814	0.91336	1.2803	0.364	0.0587912	0.235243	1.03749
Lymphocyte.atypical.percent__.	1	1296	0.87375	0.68854	1.1088	0.267	0.62069	0.636878	0.842056	0.621672	1.1406	303	NA	NA	NA	NA	NA	NA	NA	NA	NA	486	NA	NA	NA	NA	NA	NA	NA	NA	NA	233	NA	NA	NA	NA	NA	NA	NA	NA	NA	274	NA	NA	NA	NA	NA	NA	NA
Rubella.performed__other_unit	1	1175	0.63562	0.28523	1.4165	0.268	1.66054	1.03216	0.392408	0.0750491	2.05192	882	NA	NA	NA	NA	NA	NA	NA	NA	NA	249	NA	NA	NA	NA	NA	NA	NA	NA	NA	33	NA	NA	NA	NA	NA	NA	NA	NA	NA	11	NA	NA	NA	NA	NA	NA	NA
Prothrombin.INR__no_units	1	13421	1.0893	0.93273	1.2721	0.28	0.179094	0.28606	1.05013	0.960941	1.14762	2503	2.1947	0.86282	5.5824	0.0989	0.0879956	0.203825	1.37772	0.941625	2.01578	4955	1.6027	1.1579	2.2182	0.00445	0.147185	0.262119	1.28051	1.07989	1.5184	2812	1.0071	0.74777	1.3565	0.963	0.216199	0.303395	1.00433	0.838308	1.20324	3151	0.93876	0.75001	1.175	0.581	0.268522	0.328636	0.959315
PH.urine.dipstick__no_units	1	30296	1.1939	0.86411	1.6495	0.283	1.79338	0.131196	1.0476	0.962401	1.14033	10474	1.3767	0.22087	8.5811	0.732	1.81597	0.128747	1.0858	0.677828	1.73933	10551	1.0883	0.54706	2.1651	0.809	1.78417	0.131079	1.02244	0.853737	1.22447	4413	1.0788	0.57822	2.0127	0.812	1.77789	0.130389	1.01998	0.86688	1.2001	4858	1.1859	0.74261	1.8937	0.475	1.77872	0.13091	1.04564
Red_blood_cells_.RBC..urine.microscopic___hpf	1	6593	1.0488	0.96062	1.1451	0.288	0.973214	0.905042	1.09007	0.929859	1.27794	2109	1.0428	0.60609	1.7943	0.88	0.894457	0.890444	1.07755	0.409943	2.83243	2220	1.0847	0.89522	1.3142	0.407	0.957194	0.881975	1.15417	0.822634	1.61925	1040	1.046	0.87398	1.2519	0.624	1.00169	0.893034	1.08365	0.786172	1.49371	1224	1.0407	0.92034	1.1768	0.525	1.11378	0.96322	1.0799
Glucose.fasting__mg_dl	1	2514	1.5656	0.68242	3.5918	0.29	4.60531	0.229562	1.22852	0.839091	1.79869	933	NA	NA	NA	NA	NA	NA	NA	NA	NA	1051	1.4109	0.28535	6.9761	0.673	4.64917	0.239838	1.17953	0.547972	2.53899	315	NA	NA	NA	NA	NA	NA	NA	NA	NA	215	NA	NA	NA	NA	NA	NA	NA
Epithelial_cells.urine.microscopic___hpf	1	4127	0.91731	0.78079	1.0777	0.294	0.668345	0.784353	0.873367	0.678294	1.12455	1447	0.78083	0.35691	1.7083	0.536	0.914224	0.827075	0.664162	0.181913	2.42491	1343	0.73605	0.49629	1.0916	0.127	0.552598	0.75302	0.630309	0.348149	1.1411	618	NA	NA	NA	NA	NA	NA	NA	NA	NA	719	NA	NA	NA	NA	NA	NA	NA
Varicella	0	122250	0.55253	0.17811	1.714	0.304	0.00121881	0.0348904	0.959448	0.886569	1.03832	52954	2.0823e-06	0	Inf	0.992	0.00141632	0.0376078	0.373823	0	NA	42915	1.0083	0.25168	4.0392	0.991	0.001235	0.0351213	1.00058	0.907641	1.10303	13658	4.7837e-06	0	Inf	0.976	0.000732172	0.0270498	0.51544	0	NA	12723	0.54255	0.076354	3.8552	0.541	0.000864576	0.0293921	0.964693
White_blood_cells_.WBC..urine.microscopic__NA	1	1467	1.0674	0.93608	1.2171	0.33	1.46107	1.22289	1.17285	0.85082	1.61692	378	NA	NA	NA	NA	NA	NA	NA	NA	NA	465	NA	NA	NA	NA	NA	NA	NA	NA	NA	260	NA	NA	NA	NA	NA	NA	NA	NA	NA	364	NA	NA	NA	NA	NA	NA	NA
Blood_urea_nitrogencreatinine_ratio_.BUNCREA.__no_units	0	15513	1.0045	0.99516	1.014	0.344	17.4448	6.46113	1.06021	0.939229	1.19681	4543	0.98133	0.91925	1.0476	0.572	15.2786	5.32453	0.818141	0.407946	1.64083	6145	0.99379	0.97462	1.0133	0.531	17.3407	6.22592	0.925359	0.726071	1.17882	2528	1.0114	0.99305	1.0301	0.225	18.3961	6.75572	1.1657	0.910071	1.49286	2297	1.0105	0.99681	1.0244	0.133	20.9605	7.02316	1.15849
Carbon_dioxide.partial_pressure_.PCO2..arterial_blood__mm_Hg	1	2632	1.2	0.82163	1.7527	0.345	3.71675	0.253426	1.09683	0.905219	1.329	394	NA	NA	NA	NA	NA	NA	NA	NA	NA	1097	1.6111	0.79696	3.257	0.184	3.73601	0.247408	1.26617	0.893777	1.7937	629	NA	NA	NA	NA	NA	NA	NA	NA	NA	512	NA	NA	NA	NA	NA	NA	NA
Specific_gravity.urine.dipstick__no_units	1	29803	0.048964	7.0696e-05	33.912	0.366	0.0177384	0.0073199	0.956798	0.869433	1.05294	10382	7.8005e-06	3.5347e-19	NA	0.453	0.0190289	0.00780126	0.832347	0.515357	1.34431	10360	0.00604	1.8226e-08	2001.7	0.431	0.0176316	0.00730451	0.928075	0.77079	1.11746	4309	1.2836e-05	3.3188e-11	4.9649	0.0862	0.0168075	0.00669406	0.860025	0.723945	1.02168	4752	214.33	0.010832	4240900	0.288	0.0159958	0.00621822	1.06903
Lactate_dehydrogenase.total_.LDH.__u_l	1	3116	1.1102	0.87593	1.4072	0.387	5.44343	0.428181	1.09368	0.892756	1.33982	855	NA	NA	NA	NA	NA	NA	NA	NA	NA	1175	1.0766	0.70983	1.6329	0.728	5.4562	0.427705	1.06518	0.745892	1.52113	573	NA	NA	NA	NA	NA	NA	NA	NA	NA	513	NA	NA	NA	NA	NA	NA	NA
Asthma	0	122250	1.0426	0.94615	1.149	0.399	0.0798528	0.271066	1.02289	0.970437	1.07821	52954	1.9561	1.3564	2.8208	0.000328	0.0737432	0.261355	1.42008	1.17274	1.71955	42915	1.1251	0.94259	1.3429	0.192	0.0887801	0.284429	1.06934	0.966926	1.1826	13658	0.86259	0.71095	1.0466	0.134	0.0855176	0.279661	0.920648	0.826286	1.0258	12723	0.97702	0.83239	1.1468	0.776	0.0690875	0.253613	0.988279
Alanine_aminotransferase_.ALT.__u_l	1	46339	0.96858	0.89874	1.0438	0.403	3.00949	0.531103	0.966658	0.892791	1.04659	14498	1.0292	0.70469	1.5033	0.881	3.04825	0.563753	1.03303	0.673933	1.58351	18536	0.7747	0.66511	0.90236	0.00104	3.09654	0.499066	0.775074	0.665617	0.902533	6948	1.0596	0.91836	1.2226	0.428	2.91151	0.494312	1.0589	0.91925	1.21981	6357	1.0412	0.92945	1.1663	0.486	2.77432	0.496804	1.0409
Hispanic	0	122250	1.0507	0.935	1.1807	0.406	0.138421	0.345343	1.03476	0.954641	1.12157	52954	0.58515	0.38851	0.88131	0.0103	0.195623	0.396683	0.653669	0.47233	0.904622	42915	1.0483	0.86972	1.2634	0.621	0.119772	0.324698	1.03108	0.913342	1.16397	13658	1.1182	0.89464	1.3976	0.326	0.0669937	0.25002	1.05744	0.94585	1.18222	12723	1.2194	0.96522	1.5404	0.0963	0.0399277	0.195797	1.08076
Oxygen.partial_pressure_.PO2..arterial_blood__mm_Hg	1	2551	0.90466	0.71231	1.1489	0.411	4.47524	0.427997	0.917808	0.747973	1.12616	373	NA	NA	NA	NA	NA	NA	NA	NA	NA	1059	0.79346	0.50747	1.2406	0.31	4.49494	0.406032	0.828717	0.576467	1.19134	613	NA	NA	NA	NA	NA	NA	NA	NA	NA	506	NA	NA	NA	NA	NA	NA	NA
Amylase.total__u_l	1	1471	1.1517	0.81928	1.6189	0.416	4.02417	0.527132	1.16053	0.810466	1.66178	482	NA	NA	NA	NA	NA	NA	NA	NA	NA	564	NA	NA	NA	NA	NA	NA	NA	NA	NA	218	NA	NA	NA	NA	NA	NA	NA	NA	NA	207	NA	NA	NA	NA	NA	NA	NA
Creatine_kinase.total_.CK.__u_l	1	4995	1.0415	0.94219	1.1512	0.427	4.6409	0.810942	1.06814	0.907937	1.25655	966	NA	NA	NA	NA	NA	NA	NA	NA	NA	1987	0.98123	0.8044	1.1969	0.852	4.70024	0.795901	0.970291	0.707181	1.33123	1052	1.1311	0.93034	1.3753	0.217	4.55681	0.789144	1.21469	0.892293	1.6536	990	NA	NA	NA	NA	NA	NA	NA
ABO_A	0	16593	0.96517	0.87049	1.0702	0.501	0.357259	0.479207	0.966596	0.875526	1.06718	6155	0.89881	0.54423	1.4844	0.677	0.343298	0.474849	0.903648	0.561143	1.4552	5243	0.97101	0.80148	1.1764	0.764	0.353233	0.47802	0.97227	0.809315	1.16803	2660	0.93216	0.76997	1.1285	0.471	0.373684	0.483872	0.934274	0.77649	1.12411	2535	1.0001	0.84362	1.1855	0.999	0.382249	0.486033	1.00006
Ammonia_.NH3.__umol_l	1	1429	1.0857	0.8531	1.3817	0.504	3.48269	0.554849	1.09555	0.83836	1.43158	195	NA	NA	NA	NA	NA	NA	NA	NA	NA	591	NA	NA	NA	NA	NA	NA	NA	NA	NA	360	NA	NA	NA	NA	NA	NA	NA	NA	NA	283	NA	NA	NA	NA	NA	NA	NA
Folate__ng_ml	1	5204	0.93839	0.77617	1.1345	0.511	2.56648	0.473452	0.941565	0.786683	1.12692	1309	0.37828	0.1209	1.1836	0.0948	2.49861	0.459426	0.409333	0.143511	1.16752	1906	0.95964	0.64569	1.4262	0.839	2.56692	0.476159	0.961524	0.659299	1.40226	969	NA	NA	NA	NA	NA	NA	NA	NA	NA	1020	0.93464	0.70966	1.2309	0.63	2.62978	0.482911	0.9368
Prostate_specific_antigen.total_.PSA.__ng_ml	1	5984	0.97324	0.89675	1.0563	0.516	-0.105675	1.1423	0.939911	0.779602	1.1333	529	NA	NA	NA	NA	NA	NA	NA	NA	NA	3804	0.90439	0.76271	1.0724	0.248	-0.0704127	1.0177	0.815026	0.576176	1.15289	1204	0.90789	0.80049	1.0297	0.132	-0.0565248	1.42176	0.759735	0.531118	1.08678	447	NA	NA	NA	NA	NA	NA	NA
ESTIMATED_AVERAGE_GLUCOSE__mg_dl	1	1976	0.79034	0.36135	1.7286	0.556	4.92657	0.23568	0.89502	0.618906	1.29431	532	NA	NA	NA	NA	NA	NA	NA	NA	NA	924	NA	NA	NA	NA	NA	NA	NA	NA	NA	324	NA	NA	NA	NA	NA	NA	NA	NA	NA	196	NA	NA	NA	NA	NA	NA	NA
PAIN__out_of_10	0	33513	0.99541	0.97892	1.0122	0.59	2.82993	3.08912	0.971996	0.876666	1.0778	12483	0.98146	0.91051	1.0579	0.625	3.39583	3.18439	0.88764	0.550419	1.43114	12494	0.98839	0.95875	1.019	0.452	2.84856	3.08589	0.930469	0.771062	1.12318	4596	1.0029	0.97231	1.0344	0.857	2.16374	2.81567	1.0162	0.853738	1.20981	3940	0.99196	0.96456	1.0201	0.572	1.75504	2.62932	0.958426
Mean_corpuscular_volume_.MCV.__fl	0	50454	0.99847	0.99291	1.0041	0.591	89.3756	6.41821	0.980525	0.912713	1.05393	17059	1.0228	0.99258	1.054	0.141	87.4338	6.26416	1.32652	0.910914	1.93266	18761	0.99654	0.98505	1.0082	0.558	89.5045	6.06627	0.958824	0.832976	1.10416	7328	0.99628	0.98546	1.0072	0.504	90.9262	6.28021	0.954306	0.831961	1.0943	7306	0.99866	0.99053	1.0069	0.748	92.0232	6.36731	0.983111
HIV	0	122250	1.1026	0.75471	1.611	0.613	0.00495706	0.0702319	1.01382	0.961242	1.06928	52954	2.0775	0.84574	5.103	0.111	0.00364467	0.0602616	1.09212	0.98001	1.21705	42915	0.88458	0.51147	1.5298	0.661	0.00796924	0.0889152	0.978426	0.887604	1.07853	13658	0.82117	0.34061	1.9797	0.661	0.00388051	0.062175	0.975797	0.874654	1.08863	12723	1.1368	0.42605	3.033	0.798	0.00141476	0.0375882	1.00968
SBP__mm_Hg	1	66718	1.0848	0.79025	1.4891	0.615	4.8309	0.119804	1.01969	0.945156	1.1001	26875	10.049	2.0595	49.032	0.00433	4.78997	0.116577	1.71256	1.18346	2.47822	24391	1.3465	0.70007	2.5897	0.373	4.84966	0.11242	1.06918	0.922957	1.23856	8198	1.1157	0.60215	2.0671	0.728	4.86829	0.114469	1.02537	0.89036	1.18086	7254	0.7281	0.4549	1.1654	0.186	4.87723	0.115095	0.929559
Vitamin_B12__pg_ml	1	9614	1.0333	0.90669	1.1776	0.623	6.30398	0.520095	1.03467	0.903128	1.18536	2552	3.0042	1.3784	6.5476	0.00565	6.23637	0.485743	2.91144	1.36584	6.206	3609	1.2915	0.96174	1.7343	0.089	6.30842	0.51497	1.30144	0.960617	1.76313	1690	1.2576	0.9649	1.639	0.0899	6.3552	0.544164	1.28328	0.96186	1.71211	1763	0.80852	0.67551	0.96772	0.0205	6.34369	0.544553	0.793354
White_blood_cells_.WBC..urine.microscopic___hpf	1	7491	0.98538	0.92407	1.0508	0.653	1.37852	1.20246	0.965196	0.827033	1.12656	2407	1.1249	0.78234	1.6174	0.525	1.18276	1.10423	1.29679	0.581524	2.89179	2531	1.0352	0.89214	1.2012	0.649	1.30708	1.17793	1.08489	0.764235	1.54015	1192	1.0058	0.8853	1.1427	0.929	1.57562	1.25934	1.01469	0.735763	1.39931	1361	0.93853	0.85727	1.0275	0.17	1.68497	1.27697	0.850418
Myelocyte.percent__.	1	1319	1.0651	0.80489	1.4094	0.659	0.40458	0.51404	1.06695	0.799999	1.42305	260	NA	NA	NA	NA	NA	NA	NA	NA	NA	520	NA	NA	NA	NA	NA	NA	NA	NA	NA	278	NA	NA	NA	NA	NA	NA	NA	NA	NA	261	NA	NA	NA	NA	NA	NA	NA
South_East_South_Central	0	122250	1.0594	0.81307	1.3803	0.669	0.0189202	0.134137	1.01559	0.945997	1.09031	52954	0.0057583	1.7788e-09	NA	0.5	0.0185692	0.132623	0.254639	0.00477665	13.5746	42915	1.9709	1.1823	3.2854	0.00926	0.0187521	0.13389	1.19924	1.04586	1.37509	13658	1.0958	0.68165	1.7617	0.706	0.0206673	0.14068	1.02609	0.897782	1.17272	12723	0.64102	0.41737	0.98452	0.0422	0.0190722	0.134035	0.887622
Bicarbonate_.HCO3..arterial_blood__mmol_l	0	2898	1.0032	0.98686	1.0198	0.702	25.1888	5.49392	1.03588	0.864731	1.2404	421	NA	NA	NA	NA	NA	NA	NA	NA	NA	1216	1.0192	0.9894	1.05	0.209	25.5529	5.51755	1.23409	0.889055	1.71327	676	NA	NA	NA	NA	NA	NA	NA	NA	NA	585	NA	NA	NA	NA	NA	NA	NA
West_Pacific	0	122250	0.9365	0.65834	1.3322	0.715	0.0450986	0.20431	0.973549	0.842976	1.12435	52954	0.7359	0.14318	3.7822	0.713	0.0629949	0.2399	0.863175	0.393543	1.89322	42915	0.63343	0.32285	1.2428	0.184	0.0358727	0.182991	0.846109	0.661155	1.0828	13658	1.5852	0.85175	2.9501	0.146	0.0281125	0.162105	1.16109	0.949307	1.42012	12723	2.5153	1.3829	4.5751	0.00251	0.019966	0.133568	1.27942
Thyroid_stimulating_hormone_.TSH.__uu_ml	1	27817	0.98837	0.92801	1.0527	0.716	0.466167	0.759746	0.982386	0.892681	1.08116	9003	1.2199	0.79932	1.8617	0.357	0.426666	0.689945	1.31555	0.734117	2.35747	10899	1.0858	0.93939	1.2551	0.265	0.444051	0.776572	1.1364	0.907456	1.42319	4006	0.99211	0.8775	1.1217	0.899	0.485712	0.799274	0.98742	0.81148	1.20152	3909	0.94569	0.86591	1.0328	0.214	0.598775	0.807815	0.913735
Lipase__u_l	1	8517	1.0151	0.92892	1.1092	0.741	3.58697	0.849728	1.02577	0.882227	1.19259	3078	1.2621	0.85319	1.8669	0.244	3.54462	0.816225	1.46221	0.771677	2.77071	2989	0.97618	0.82893	1.1496	0.773	3.63018	0.864292	0.959176	0.723022	1.27251	1226	1.0033	0.85004	1.1843	0.969	3.57244	0.874381	1.00583	0.752673	1.34421	1224	1.0188	0.8802	1.1791	0.803	3.60251	0.866686	1.03276
Bilirubin.total__mg_dl	1	45332	0.98712	0.91061	1.0701	0.753	-0.758535	0.490351	0.987366	0.912257	1.0687	14217	0.5787	0.38311	0.87416	0.00935	-0.828571	0.512042	0.571131	0.374359	0.871333	18095	0.87431	0.74551	1.0254	0.0985	-0.751474	0.479054	0.879242	0.754739	1.02432	6798	1.0634	0.91037	1.2423	0.438	-0.704539	0.471624	1.05974	0.915235	1.2271	6222	1.0848	0.95938	1.2267	0.194	-0.678033	0.470523	1.07963
Hepatitis_B_surface_antibody_.HBsAb.__mu_ml	1	1400	1.0161	0.91168	1.1324	0.773	3.35476	2.20907	1.07298	0.664627	1.73212	734	NA	NA	NA	NA	NA	NA	NA	NA	NA	474	NA	NA	NA	NA	NA	NA	NA	NA	NA	134	NA	NA	NA	NA	NA	NA	NA	NA	NA	58	NA	NA	NA	NA	NA	NA	NA
Calcium.ionized__mg_dl	0	3659	0.96904	0.76549	1.2267	0.794	4.66979	0.393608	0.975545	0.81028	1.17451	780	NA	NA	NA	NA	NA	NA	NA	NA	NA	1407	0.99682	0.65625	1.5141	0.988	4.64337	0.400351	0.997454	0.713719	1.39396	769	NA	NA	NA	NA	NA	NA	NA	NA	NA	703	NA	NA	NA	NA	NA	NA	NA
Northeast_Middle_Atlantic	0	122250	0.97643	0.80626	1.1825	0.807	0.315398	0.457479	0.978409	0.821162	1.16576	52954	2.7217	1.1006	6.7305	0.0302	0.300808	0.450466	2.46473	1.0902	5.57205	42915	1.4934	0.99404	2.2435	0.0535	0.340381	0.467976	1.4555	0.994421	2.13034	13658	0.89097	0.62982	1.2604	0.514	0.317598	0.459886	0.899258	0.653619	1.23721	12723	0.64163	0.47899	0.85951	0.00293	0.289494	0.443879	0.674401
Eosinophil.absolute__x10.3_ul	1	41886	0.99542	0.94156	1.0524	0.872	-1.92925	0.667043	0.993898	0.922807	1.07051	13607	1.0738	0.79972	1.4417	0.636	-2.02953	0.675932	1.10101	0.73924	1.63975	15685	0.84843	0.75866	0.94882	0.00397	-1.91655	0.652589	0.806921	0.697333	0.933729	6266	1.1613	1.0403	1.2963	0.00774	-1.84065	0.655506	1.21655	1.05316	1.40527	6328	0.97054	0.89436	1.0532	0.473	-1.83279	0.665411	0.96098
Base_excessdeficit.arterial_blood__mmol_l	1	2273	0.9913	0.88253	1.1135	0.883	1.07825	0.852745	0.985209	0.808057	1.20124	309	NA	NA	NA	NA	NA	NA	NA	NA	NA	956	NA	NA	NA	NA	NA	NA	NA	NA	NA	527	NA	NA	NA	NA	NA	NA	NA	NA	NA	481	NA	NA	NA	NA	NA	NA	NA
Bicarbonate_.HCO3.__mmol_l	0	6260	0.99859	0.97998	1.0175	0.883	25.5162	4.02923	0.988666	0.849619	1.15005	1708	0.88377	0.80466	0.97066	0.00981	24.5977	3.28938	0.443587	0.239357	0.822087	2360	0.99257	0.95897	1.0273	0.671	25.7411	4.1541	0.939883	0.706045	1.25079	1160	1.0027	0.96813	1.0385	0.881	25.9004	4.36496	1.02375	0.753707	1.39068	1032	1.0087	0.97831	1.04	0.58	26.0904	4.21091	1.0755
TEMP__deg_c	1	57223	0.80637	0.0035887	181.19	0.938	3.60306	0.0077927	0.996651	0.915994	1.08441	23358	5.2135e-07	5.7223e-18	NA	0.261	3.60466	0.00813141	0.790356	0.524311	1.1914	20510	0.60406	1.9381e-05	18827	0.924	3.60256	0.00758755	0.99238	0.848175	1.1611	6967	262.57	0.0057034	NA	0.309	3.60136	0.00698262	1.0809	0.930388	1.25576	6388	0.32729	7.6192e-05	1405.9	0.794	3.60062	0.00670402	0.985136
Reticulocyte.absolute__x10.3_ul	0	1052	1.0001	0.99583	1.0043	0.98	73.1483	42.953	1.0047	0.69839	1.44572	270	NA	NA	NA	NA	NA	NA	NA	NA	NA	354	NA	NA	NA	NA	NA	NA	NA	NA	NA	218	NA	NA	NA	NA	NA	NA	NA	NA	NA	210	NA	NA	NA	NA	NA	NA	NA
[truncated: 2 more columns]
