# Supplementary material for: Fluid, pH and electrolyte imbalance associated with COVID-19 mortality
Source: Research Square preprint supplement (doi:10.21203/rs.3.rs-145823/v1), 2021-03-08
Supplement: Supplementary file 14 [file f2c3f953709f54041d699a64.xlsx]

## Sheet: comorbidities - icd10 map
R-package("icd"): categories	Short_name	Long_name	ICD10 codes
charlson	MI	Myocardial Infarction	I21	I210	I2101	I2102	I2109	I211	I2111	I2119	I212	I2121	I2129	I213	I214	I219	I21A	I21A1	I21A9	I22	I220	I221	I222	I228	I229	I252
	CHF	Congestive Heart Failure	I099	I110	I130	I132	I255	I420	I425	I426	I427	I428	I429	I43	I50	I501	I502	I5020	I5021	I5022	I5023	I503	I5030	I5031	I5032	I5033	I504	I5040	I5041	I5042	I5043	I508	I5081	I50810	I50811	I50812	I50813	I50814	I5082	I5083	I5084	I5089	I509	P290
	PVD	Periphral Vascular Disease	I70	I700	I701	I702	I7020	I70201	I70202	I70203	I70208	I70209	I7021	I70211	I70212	I70213	I70218	I70219	I7022	I70221	I70222	I70223	I70228	I70229	I7023	I70231	I70232	I70233	I70234	I70235	I70238	I70239	I7024	I70241	I70242	I70243	I70244	I70245	I70248	I70249	I7025	I7026	I70261	I70262	I70263	I70268	I70269	I7029	I70291
	Stroke	Cerebrovascular Disease	G45	G450	G451	G452	G453	G454	G458	G459	G46	G460	G461	G462	G463	G464	G465	G466	G467	G468	H340	H3400	H3401	H3402	H3403	I60	I600	I6000	I6001	I6002	I601	I6010	I6011	I6012	I602	I6020	I6021	I6022	I603	I6030	I6031	I6032	I604	I605	I6050	I6051	I6052	I606	I607
	Dementia	Dementia	F00	F01	F015	F0150	F0151	F02	F028	F0280	F0281	F03	F039	F0390	F0391	F051	G30	G300	G301	G308	G309	G311
	Pulmonary	Chronic Pulmonary Disease	I278	I2781	I2782	I2783	I2789	I279	J40	J41	J410	J411	J418	J42	J43	J430	J431	J432	J438	J439	J44	J440	J441	J449	J45	J452	J4520	J4521	J4522	J453	J4530	J4531	J4532	J454	J4540	J4541	J4542	J455	J4550	J4551	J4552	J459	J4590	J45901	J45902	J45909	J4599	J45990	J45991
	Rheumatic	Connective Tissue Disease-Rheumatic Disease	M05	M050	M0500	M0501	M05011	M05012	M05019	M0502	M05021	M05022	M05029	M0503	M05031	M05032	M05039	M0504	M05041	M05042	M05049	M0505	M05051	M05052	M05059	M0506	M05061	M05062	M05069	M0507	M05071	M05072	M05079	M0509	M051	M0510	M0511	M05111	M05112	M05119	M0512	M05121	M05122	M05129	M0513	M05131	M05132	M05139	M0514
	PUD	Peptic Ulcer Disease	K25	K250	K251	K252	K253	K254	K255	K256	K257	K259	K26	K260	K261	K262	K263	K264	K265	K266	K267	K269	K27	K270	K271	K272	K273	K274	K275	K276	K277	K279	K28	K280	K281	K282	K283	K284	K285	K286	K287	K289
	LiverMild	Mild Liver Disease	B18	B180	B181	B182	B188	B189	K700	K701	K7010	K7011	K702	K703	K7030	K7031	K709	K713	K714	K715	K7150	K7151	K717	K73	K730	K731	K732	K738	K739	K74	K740	K741	K742	K743	K744	K745	K746	K7460	K7469	K760	K762	K763	K764	K768	K7681	K7689	K769	Z944
	DM	Diabetes without complications	E100	E101	E1010	E1011	E106	E1061	E10610	E10618	E1062	E10620	E10621	E10622	E10628	E1063	E10630	E10638	E1064	E10641	E10649	E1065	E1069	E108	E109	E110	E1100	E1101	E111	E1110	E1111	E116	E1161	E11610	E11618	E1162	E11620	E11621	E11622	E11628	E1163	E11630	E11638	E1164	E11641	E11649	E1165	E1169	E118
	DMcx	Diabetes with complications	E102	E1021	E1022	E1029	E103	E1031	E10311	E10319	E1032	E10321	E103211	E103212	E103213	E103219	E10329	E103291	E103292	E103293	E103299	E1033	E10331	E103311	E103312	E103313	E103319	E10339	E103391	E103392	E103393	E103399	E1034	E10341	E103411	E103412	E103413	E103419	E10349	E103491	E103492	E103493	E103499	E1035	E10351	E103511	E103512	E103513	E103519
	Paralysis	Paraplegia and Hemiplegia	G041	G114	G801	G802	G81	G810	G8100	G8101	G8102	G8103	G8104	G811	G8110	G8111	G8112	G8113	G8114	G819	G8190	G8191	G8192	G8193	G8194	G82	G822	G8220	G8221	G8222	G825	G8250	G8251	G8252	G8253	G8254	G830	G831	G8310	G8311	G8312	G8313	G8314	G832	G8320	G8321	G8322	G8323	G8324
	Renal	Renal Disease	I120	I131	I1310	I1311	N032	N033	N034	N035	N036	N037	N052	N053	N054	N055	N056	N057	N18	N181	N182	N183	N184	N185	N186	N189	N19	N250	Z490	Z4901	Z4902	Z491	Z492	Z940	Z992
	Cancer	Cancer	C00	C000	C001	C002	C003	C004	C005	C006	C008	C009	C01	C02	C020	C021	C022	C023	C024	C028	C029	C03	C030	C031	C039	C04	C040	C041	C048	C049	C05	C050	C051	C052	C058	C059	C06	C060	C061	C062	C068	C0680	C0689	C069	C07	C08	C080	C081	C089
	LiverSevere	Moderate or Severe Liver Disease	I850	I8500	I8501	I859	I864	I982	K704	K7040	K7041	K711	K7110	K7111	K721	K7210	K7211	K729	K7290	K7291	K765	K766	K767
	Mets	Metastatic Carcinoma	C77	C770	C771	C772	C773	C774	C775	C778	C779	C78	C780	C7800	C7801	C7802	C781	C782	C783	C7830	C7839	C784	C785	C786	C787	C788	C7880	C7889	C79	C790	C7900	C7901	C7902	C791	C7910	C7911	C7919	C792	C793	C7931	C7932	C794	C7940	C7949	C795	C7951	C7952	C796	C7960
	HIV	HIV/AIDS	B20	B21	B22	B24
ahrq	Valvular	Valvular disease	A5203	I050	I051	I052	I058	I059	I060	I061	I062	I068	I069	I070	I071	I072	I078	I079	I080	I081	I082	I083	I088	I089	I091	I0989	I340	I341	I342	I348	I349	I350	I351	I352	I358	I359	I360	I361	I362	I368	I369	I370	I371	I372	I378	I379	I38	I39	Q230
	PHTN	Pulmonary circulation disorders	I2601	I2602	I2609	I2690	I2692	I2699	I270	I271	I2781	I2782	I2789	I279	I289	T800XXA	T82817A	T82818A
	HTN	Hypertension, combined	I10	O10011	O10012	O10013	O10019	O1002	O1003	O10911	O10912	O10913	O10919	O1092	O1093
	NeuroOther	Other neurological disorders	E7500	E7501	E7502	E7509	E7510	E7511	E7519	E7523	E7525	E7529	E754	F842	G10	G110	G111	G112	G113	G114	G118	G119	G120	G121	G1220	G1221	G1222	G1229	G128	G129	G132	G138	G20	G214	G2401	G2402	G2409	G242	G248	G254	G255	G2581	G300	G301	G308	G309	G3101	G3109	G311
	Hypothyroid	Hypothyroidism	E000	E001	E002	E009	E018	E02	E030	E031	E032	E033	E038	E039	E890
	Lymphoma	Lymphoma	C8100	C8101	C8102	C8103	C8104	C8105	C8106	C8107	C8108	C8109	C8110	C8111	C8112	C8113	C8114	C8115	C8116	C8117	C8118	C8119	C8120	C8121	C8122	C8123	C8124	C8125	C8126	C8127	C8128	C8129	C8130	C8131	C8132	C8133	C8134	C8135	C8136	C8137	C8138	C8139	C8140	C8141	C8142	C8143	C8144	C8145	C8146
	Tumor	Solid tumor without metastasis	C000	C001	C002	C003	C004	C005	C006	C008	C009	C01	C020	C021	C022	C023	C024	C028	C029	C030	C031	C039	C040	C041	C048	C049	C050	C051	C052	C058	C059	C060	C061	C062	C0680	C0689	C069	C07	C080	C081	C089	C090	C091	C098	C099	C100	C101	C102	C103
	Coagulopathy	Coagulopathy	D65	D66	D67	D680	D681	D682	D68311	D68312	D68318	D6832	D684	D688	D689	D691	D693	D6941	D6942	D6949	D6951	D6959	D696	D7582	O99111	O99112	O99113	O99119	O9912	O9913
	Obesity	Obesity	E6601	E6609	E661	E662	E668	E669	O99210	O99211	O99212	O99213	O99214	O99215	R939	Z6830	Z6831	Z6832	Z6833	Z6834	Z6835	Z6836	Z6837	Z6838	Z6839	Z6841	Z6842	Z6843	Z6844	Z6845	Z6854
	WeightLoss	Weight loss	E40	E41	E42	E43	E440	E441	E45	E46	E640	R634	R636
	FluidsLytes	Fluid and electrolye disorders	E860	E861	E869	E870	E871	E872	E873	E874	E875	E876	E8770	E8771	E8779	E878
	BloodLoss	Blood loss anemia	D500	O9081	O99011	O99012	O99013	O99019	O9902	O9903
	Anemia	Deficiency anemias	D501	D508	D509	D510	D511	D512	D513	D518	D519	D520	D521	D528	D529	D530	D531	D532	D538	D539	D630	D631	D638	D649
	Alcohol	Alcohol abuse	F1010	F10120	F10121	F10129	F1014	F10150	F10151	F10159	F10180	F10181	F10182	F10188	F1019	F1020	F1021	F10220	F10221	F10229	F10230	F10231	F10232	F10239	F1024	F10250	F10251	F10259	F1026	F1027	F10280	F10281	F10282	F10288	F1029	F10921	F1094	F10950	F10951	F10959	F1096	F1097	F10980	F10981	F10982	F10988	F1099
	Drugs	Drug abuse	F1110	F11120	F11122	F11129	F1114	F11159	F11181	F11182	F11188	F1119	F1120	F1121	F11220	F11221	F11222	F11229	F1123	F1124	F11250	F11251	F11259	F11281	F11282	F11288	F1129	F1190	F11922	F1193	F1194	F11959	F11981	F11982	F11988	F1199	F1210	F12122	F12159	F12180	F12188	F1219	F1220	F1221	F12220	F12221	F12222	F12229	F12250
	Psychoses	Psychoses	F200	F201	F202	F203	F205	F2081	F2089	F209	F22	F23	F24	F250	F251	F258	F259	F28	F29	F3010	F3011	F3012	F3013	F302	F303	F304	F308	F309	F310	F3110	F3111	F3112	F3113	F312	F3130	F3131	F3132	F314	F315	F3160	F3161	F3162	F3163	F3164	F3170	F3171	F3172	F3173	F3174
	Depression	Depression	F320	F321	F322	F323	F328	F329	F330	F331	F332	F333	F338	F339	F341	F4321
elix	Arrhythmia	Cardiac arrhythmias	I441	I442	I443	I4430	I4439	I456	I459	I47	I470	I471	I472	I479	I48	I480	I481	I482	I483	I484	I489	I4891	I4892	I49	I490	I4901	I4902	I491	I492	I493	I494	I4940	I4949	I495	I498	I499	R000	R001	R008	T821	T8211	T82110	T82110A	T82110D	T82110S	T82111	T82111A	T82111D	T82111S
custom	COPD	Chronic obstructive pulmonary disease	J44	J440	J441	J448	J449
	Varicella	Varicella	B01	B010	B011	B012	B018	B019
	Herpes Zoster	Herpes Zoster	B02	B020	B021	B022	B023	B027	B028	B029
	Asthma	Asthma	J45	J450	J451	J458	J459
	HF	Heart failure	I50	I500	I501	I509
	VolumeUp	Volume up	E871	E8770	E8779
	VolumeDown	Volume down	E860	E861	E869	E870
	AcidBaseBalance	Acid base balance	E872	E873	E874	E875	E876
[truncated: 1,173 more columns]

## Sheet: icd10_map_short
R-package("icd"): categories	Short_name	Long_name	ICD10 codes
charlson	MI	Myocardial Infarction	I21.x,I22.x,I25.2
	CHF	Congestive Heart Failure	I09.9,I11.0,I13.0,I13.2,I25.5,I42.0,I42.5-I42.9,I43,I50.x,P29
	PVD	Periphral Vascular Disease	I70.x,I71.x,I73.1,I173.8,I173.9,I77.1,I79.0,I179.2,K55.1,K55.8,K55.9,Z95.8,Z95.9
	Stroke	Cerebrovascular Disease	G45.x,G46.x,H34.0,I60.x-I69.x
	Dementia	Dementia	F00.x-F03.x,F05.1,G30.x,G31.1
	Pulmonary	Chronic Pulmonary Disease	I27.8,I27.9,J40.x-J47.x,J60.x-J67.x,J68.4,J70.1,J70.3
	Rheumatic	Connective Tissue Disease-Rheumatic Disease	M05.x,M06.x,M31.5,M32.x-M34.x,M35.1,M35.3,M36.0
	PUD	Peptic Ulcer Disease	K25.x-K28.x
	LiverMild	Mild Liver Disease	B18.x,K70.0-K70.3,K70.9,K71.3-K71.5,K71.7,K73.x,K74.x,K76.0,K76.2-K76.4,K76.8,K76.9,Z94.4
	DM	Diabetes without complications	E10.0,E10.1,E10.6,E10.8,E10.9,E11.0,E11.1,E11.6,E11.8,E11.9,E12.0,E12.1,E12.6,E12.8,E12.9,E13.0,E13.1,E13.6,E13.8,E13.9,E14.0,E14.1,E14.6,E14.8,E14.9
	DMcx	Diabetes with complications	E10.2-E10.5,E10.7,E11.2-E11.5,E11.7,E12.2-E12.5,E12.7,E13.2-E13.5,E13.7,E14.2-E14.5,E14.7
	Paralysis	Paraplegia and Hemiplegia	G04.1,G11.4,G80.1,G80.2,G81.x,G82.x,G83.0-G83.4,G83.9
	Renal	Renal Disease	I12.0,I13.1,N03.2-N03.7,N05.2-N05.7,N18.x,N19.x,N25.0,Z49.0-Z49.2,Z94.0,Z99.2
	Cancer	Cancer	C00.x-C26.x,C30.x-C34.x,C37.x-C41.x,C43.x,C45.x-C58.x,C60.x-C76.x,C81.x-C85.x,C88.x,C90.x-C97.x
	LiverSevere	Moderate or Severe Liver Disease	I85.0,I85.9,I86.4,I98.2,K70.4,K71.1,K72.1,K72.9,K76.5,K76.6,K76.7
	Mets	Metastatic Carcinoma	C77.x-C80.x
	HIV	HIV/AIDS	B20.x-B22.x,B24.x
ahrq	Valvular	Valvular disease	A52.0,I05.x-I08.x,I09.1,I09.8,I34.x-I39.x,Q23.0-Q23.3,Z95.2-Z95.4
	PHTN	Pulmonary circulation disorders	I26.0,I26.9,I27.0,I27.1,I27.8,I27.9,I28.9,T80.0XXA,T82.817A,T82.818A
	HTN	Hypertension, combined	I10,O10.x
	NeuroOther	Other neurological disorders	E75.0-E75.2,E75.4,F84.2,G10.x-G13.x,G20,G21.4,G24.0,G24.2,G24.8,G25.4,G25,8,G30.x,G31.x,G32.8,G35.x-G37.x,G40.x,G47.4,G80.3,G91.x,G93.7-G93.9,G94.0,O99.3,P91.6,R41,R47.0,R56.x
	Hypothyroid	Hypothyroidism	E00.x-E03.x,E89.0
	Lymphoma	Lymphoma	C81.x-C85.x,C88.x,C90.0,C90.2,C96.x,D47.Z9
	Tumor	Solid tumor without metastasis	C00.x-C26.x,C30.x-C34.x,C37.x-C41.x,C43.x,C45.x,C58.x,C60.x-C76.x,C7A.x,D03.x,E31.2
	Coagulopathy	Coagulopathy	D65.x-D68.x,D69.1,D69.3-D96.6,D75.82,O99.1
	Obesity	Obesity	E66.x,O99.2,R93.9,Z68.3-Z68.5
	WeightLoss	Weight loss	E40.x-E46.x,E64.0,R63.4,R63.6
	FluidsLytes	Fluid and electrolye disorders	E86.x,E87.x
	BloodLoss	Blood loss anemia	D50.0,O90.81,O99.0
	Anemia	Deficiency anemias	D50.1-D50.9,D51.x-D53.x,D63.x,D64.9
	Alcohol	Alcohol abuse	F10.1,F10.2,F10.9
	Drugs	Drug abuse	F11.x-F16.x,F18.x,F19.x,F55.x,O99.32
	Psychoses	Psychoses	F20.x,F22.x-F25.x,F28.x-F34.x,F39.x,F44.89,F84.3
	Depression	Depression	F32.x-F33,F34.1,F43.21
elix	Arrhythmia	Cardiac arrhythmias	I44.1-144.3,I45.6,I45.9,I47.x-I49.x,R00.0,R00.1,R00.8,T82.1,Z45.0,Z95.0
custom	COPD	Chronic obstructive pulmonary disease	J44.x
	Varicella	Varicella	B01.x
	Herpes Zoster	Herpes Zoster	B02.x
	Asthma	Asthma	J45.x
	VolumeUp	Volume up	E87.1,E87.70,E87.79
	VolumeDown	Volume down	E86.x,E87.0
	AcidBaseBalance	Acid base balance	E87.2-E87.6
	HF	Heart failure	I50.x
